# Supplementary material
Source: PubMed Central journal article supplement (PMC2933352)
Supplement: mmc1.pdf [file mmc1.pdf]

The American Journal of Human Genetics, Volume 87

## **Supplemental Data**

### **Mutability of Y-Chromosomal Microsatellites:**

**Rates, Characteristics, Molecular Bases,**

**and Forensic Implications**

**Kaye N. Ballantyne, Miriam Goedbloed, Rixun Fang, Onno Schaap, Oscar Lao, Andreas Wollstein, Ying Choi, Kate van Duijn, Mark Vermeulen, Silke Brauer, Ronny Decorte, Micaela Poetsch, Nicole von Wurmb-Schwark, Peter de Knijff, Damian Labuda, H el ene V ezina, Hans Knoblauch, R udiger Lessig, Lutz Roewer, Rafal Ploski, Tadeusz Dobosz, Lotte Henke, J urgen Henke, Manohar R. Furtado, and Manfred Kayser**

**Table S1. Bayesian Median Mutation Rates, Mutation Summaries, Repeat Structures, and Genotyping Details of 186 Y-STRs from Analysing DNA-Confirmed Father-Son Pairs (See Footnote for Explanation)**

| GBD ID        | Repeat Structure (as defined in Methods and Materials)                                                                                                                                                                                          | Bayesian median mutation rate | Bayesian 95% credible interval                 | Gains/Losses | Total Mutations | Total Meioses | Primer 1 Sequence 5' - 3'   | Primer 2 Sequence 5' - 3'    | Ta in °C    | Multiplex | Ref  |
|---------------|-------------------------------------------------------------------------------------------------------------------------------------------------------------------------------------------------------------------------------------------------|-------------------------------|------------------------------------------------|--------------|-----------------|---------------|-----------------------------|------------------------------|-------------|-----------|------|
| DYF380S1      | (AAT) <sub>8-11</sub>                                                                                                                                                                                                                           | 3.84x10 <sup>-4</sup>         | 1.42x10 <sup>-5</sup> – 2.06x10 <sup>-3</sup>  | 0/0          | 0               | 1790          | AGCCATGTGGAT<br>TCACCACT    | GACAAACCCATC<br>CTGTCTCC     | TD<br>70-50 | 28        | [29] |
| DYF381S1      | (TTG) <sub>7-8</sub>                                                                                                                                                                                                                            | 3.95 x10 <sup>-4</sup>        | 1.43 x10 <sup>-5</sup> – 2.07x10 <sup>-3</sup> | 0/0          | 0               | 1774          | TCCATCCATCAA<br>TCCATCAA    | CAACCCAAACA<br>CTTGCAGAA     | TD<br>60-50 | 45        | [29] |
| DYF381S2      | (AAC) <sub>7-8</sub>                                                                                                                                                                                                                            | 3.91 x10 <sup>-4</sup>        | 1.44 x10 <sup>-5</sup> – 2.11x10 <sup>-3</sup> | 0/0          | 0               | 1756          | CAACCCAAACA<br>CTTGCAGAA    | TCCATCCATCAA<br>TCCATCAA     | TD<br>60-50 | 20        | [29] |
| DYF382S1      | (GGAT) <sub>9-16</sub> (AGAT) <sub>1</sub><br>(GGAT) <sub>3</sub> N <sub>8</sub> (GGAC) <sub>3</sub>                                                                                                                                            | 1.05 x10 <sup>-3</sup>        | 1.52 x10 <sup>-4</sup> – 3.47x10 <sup>-3</sup> | 1/0          | 1               | 1609          | TTGTAAAATGGG<br>CATGTGGA    | CCCAAAGTGCTA<br>CCCACCTA     | TD<br>70-50 | 54        | [29] |
| DYF386S1      | (AAT) <sub>7-16</sub>                                                                                                                                                                                                                           | 6.02 x10 <sup>-3</sup>        | 3.10 x10 <sup>-3</sup> – 1.04x10 <sup>-2</sup> | 3/7          | 10              | 1772          | GACTGCTCAACT<br>GCACTCCA    | CCAATGTTACTC<br>ACTATGCTGCTT | TD<br>70-50 | 29        | [29] |
| DYF387S1      | (AAAG) <sub>3</sub> (GTAG) <sub>1</sub> (GAAG) <sub>4</sub> N <sub>16</sub><br>(GAAG) <sub>9</sub> (AAAG) <sub>13</sub>                                                                                                                         | 1.59 x10 <sup>-2</sup>        | 1.08 x10 <sup>-2</sup> – 2.24x10 <sup>-2</sup> | 15/13        | 28              | 1804          | GCCTGGGTGAC<br>AGAGCTAGA    | GCCACAGTGTGA<br>GAAGTGTGA    | TD<br>70-50 | 49        | [29] |
| DYF388S1      | (CTTC) <sub>6</sub> (CTTT) <sub>5-19</sub> N <sub>18</sub> (CTTC) <sub>3</sub><br>(TTTC) <sub>1</sub> (CTTC) <sub>3</sub> N <sub>8</sub> (CTTC) <sub>3</sub><br>N <sub>32</sub> (CTTC) <sub>3</sub>                                             | 6.85 x10 <sup>-3</sup>        | 3.64 x10 <sup>-3</sup> – 1.15x10 <sup>-2</sup> | 5/6          | 11              | 1702          | TTCTAGGAAGAT<br>TAGCCACAACA | CCCAGACAACA<br>GAGCAAAAC     | TD<br>65-50 | 52        | [29] |
| DYF390S1      | (TTTA) <sub>9-14</sub>                                                                                                                                                                                                                          | 9.95 x10 <sup>-4</sup>        | 1.42 x10 <sup>-4</sup> – 3.34x10 <sup>-3</sup> | 0/1          | 1               | 1680          | AGCATTCCCTTT<br>CTCATTGC    | TGACGAGTTAGT<br>GGGTGCAG     | TD<br>70-50 | 12        | [29] |
| DYF393S1      | (AAG) <sub>4</sub> (AA) <sub>1</sub> (AAG) <sub>16-30</sub> (CAG) <sub>1-2</sub>                                                                                                                                                                | 8.57 x10 <sup>-3</sup>        | 4.91 x10 <sup>-3</sup> – 1.37x10 <sup>-2</sup> | 9/5          | 14              | 1712          | GCAACCAAAAAG<br>GTTTGGAGA   | GTGGAGCCTGCT<br>TAAAGGAA     | TD<br>70-50 | 31        | [29] |
| DYF394S1      | (ATT) <sub>3</sub> (GTT) <sub>1</sub> (ATT) <sub>6-9</sub>                                                                                                                                                                                      | 3.91 x10 <sup>-4</sup>        | 1.40 x10 <sup>-5</sup> – 2.09x10 <sup>-3</sup> | 0/0          | 0               | 1768          | GCCCTGAACAA<br>AATCTGGAG    | GCAGTGAGCTG<br>AGATGGTGA     | TD<br>70-50 | 24        | [29] |
| DYF396S1      | (TCT) <sub>6-9</sub>                                                                                                                                                                                                                            | 3.86 x10 <sup>-4</sup>        | 1.37 x10 <sup>-5</sup> – 2.06x10 <sup>-3</sup> | 0/0          | 0               | 1785          | TGCACGTCTTCA<br>TACATAGAGC  | TTGAATGCCAAG<br>TTATGTAGCA   | TD<br>70-50 | 36        | [29] |
| DYF399S1      | (GAAA) <sub>3</sub> N <sub>7-8</sub> (GAAA) <sub>10-23</sub>                                                                                                                                                                                    | 7.73 x10 <sup>-2</sup>        | 6.51 x10 <sup>-2</sup> – 9.09x10 <sup>-2</sup> | 55/84        | 139             | 1794          | GGGTTTTACCA<br>GTTTGCAT     | CCATGTTTTGGG<br>ACATTCCT     | TD<br>70-50 | 49        | [29] |
| DYF401S1      | (AAGG) <sub>3</sub> (AAGC) <sub>1</sub> (AAGG) <sub>3</sub> N <sub>39</sub><br>(AAGG) <sub>3</sub> N <sub>8</sub> (AAGG) <sub>3</sub> (AAAG) <sub>1</sub><br>(AAGG) <sub>3</sub> N <sub>13</sub> (AAAG) <sub>8-23</sub><br>G(AAGG) <sub>6</sub> | 6.50 x10 <sup>-3</sup>        | 3.08 x10 <sup>-3</sup> – 1.18x10 <sup>-2</sup> | 3/5          | 8               | 1333          | TCGCAACATA<br>GCACTTCAG     | TTCTAGGAAGAT<br>TAGCCACAACA  | TD<br>70-50 | 48        | [29] |
| DYF403S1<br>a | (TTCT) <sub>10-17</sub> N <sub>2-3</sub> (TTCT) <sub>3-17</sub>                                                                                                                                                                                 | 3.10 x10 <sup>-2</sup>        | 2.30 x10 <sup>-2</sup> – 4.07x10 <sup>-2</sup> | 29/17        | 46              | 1504          | CAAAATTCATGT<br>GGATAATGAG  | ACAGAGCAGGA<br>TTCCATCTA     | TD<br>70-50 | 54        | [29] |
| DYF403S1<br>b | (TTCT) <sub>12</sub> N <sub>2</sub> (TTCT) <sub>8</sub> (TTCC) <sub>9</sub><br>(TTCT) <sub>14</sub> N <sub>2</sub> (TTCT) <sub>3</sub>                                                                                                          | 1.19 x10 <sup>-2</sup>        | 7.05 x10 <sup>-3</sup> – 1.86x10 <sup>-2</sup> | 5/11         | 16              | 1402          | CAAAATTCATGT<br>GGATAATGAG  | ACAGAGCAGGA<br>TTCCATCTA     | TD<br>70-50 | 54        | [29] |
| DYF404S1      | (TTTC) <sub>10-20</sub> N <sub>42</sub> (TTTC) <sub>3</sub>                                                                                                                                                                                     | 1.25 x10 <sup>-2</sup>        | 7.92 x10 <sup>-3</sup> – 1.84x10 <sup>-2</sup> | 14/7         | 21              | 1739          | GGCTTAAGAAA<br>TTTCAACGCATA | CCATGATGGAAC<br>AATTGCAG     | TD<br>70-50 | 38        | [29] |
| DYF405S1      | (GGAA) <sub>4-14</sub> N <sub>115</sub> (GGAA) <sub>3</sub><br>(GAAA) <sub>1</sub> (GGAA) <sub>3</sub>                                                                                                                                          | 1.52 x10 <sup>-3</sup>        | 3.54 x10 <sup>-4</sup> – 4.13x10 <sup>-3</sup> | 1/1          | 2               | 1756          | CCGTGGTGTCTG<br>AAGCATAG    | CACATCAAGTTG<br>CCTGTTTCA    | TD<br>70-50 | 26        | [29] |
| DYF406S1      | (TATC) <sub>8-14</sub>                                                                                                                                                                                                                          | 3.82 x10 <sup>-3</sup>        | 1.61 x10 <sup>-3</sup> – 7.48x10 <sup>-3</sup> | 3/3          | 6               | 1744          | CCTGGGTGACAC<br>AGTGAGACT   | TCCACCAAAATT<br>CCATGACA     | TD<br>70-50 | 28        | [29] |

|                   |                                                                                                                                                                |                         |                                                    |      |    |      |                                 |                             |             |        |      |
|-------------------|----------------------------------------------------------------------------------------------------------------------------------------------------------------|-------------------------|----------------------------------------------------|------|----|------|---------------------------------|-----------------------------|-------------|--------|------|
| DYF410S1          | (AAAT) <sub>7-13</sub>                                                                                                                                         | 2.04 x 10 <sup>-3</sup> | 4.82 x 10 <sup>-4</sup> –<br>5.52x10 <sup>-3</sup> | 2/0  | 2  | 1309 | TGACGAGTTAGT<br>GGGTGCAG        | GCGGCTAGGGT<br>AGAATCCAT    | TD<br>70-50 | 48     | [29] |
| DYS19/<br>DYS394  | (TAGA) <sub>3</sub> (TAGG) <sub>1</sub> (TAGA) <sub>6-16</sub>                                                                                                 | 4.37 x 10 <sup>-3</sup> | 1.98 x 10 <sup>-3</sup> –<br>8.23x10 <sup>-3</sup> | 4/3  | 7  | 1756 | Yfiler                          | Yfiler                      | Yfiler      | Yfiler | [29] |
| DYS385a           | (AAGG) <sub>4</sub> N <sub>14</sub> (AAAG) <sub>3</sub> N <sub>12</sub> (AAA<br>G) <sub>3</sub> N <sub>29</sub> (AAGG) <sub>6-7</sub> (GAAA) <sub>7-23</sub>   | 2.08 x 10 <sup>-3</sup> | 6.24 x 10 <sup>-4</sup> –<br>5.06x10 <sup>-3</sup> | 2/1  | 3  | 1762 | Yfiler                          | Yfiler                      | Yfiler      | Yfiler | [29] |
| DYS385b           | (AAGG) <sub>4</sub> N <sub>14</sub> (AAAG) <sub>3</sub> N <sub>12</sub><br>(AAAG) <sub>3</sub> N <sub>29</sub><br>(AAGG) <sub>6-7</sub> (GAAA) <sub>7-23</sub> | 4.14 x 10 <sup>-3</sup> | 1.75 x 10 <sup>-3</sup> –<br>8.09x10 <sup>-3</sup> | 6/0  | 6  | 1615 | Yfiler                          | Yfiler                      | Yfiler      | Yfiler | [29] |
| DYS388            | (ATT) <sub>9-18</sub>                                                                                                                                          | 4.25 x 10 <sup>-4</sup> | 1.51 x 10 <sup>-5</sup> –<br>2.26x10 <sup>-3</sup> | 0/0  | 0  | 1635 | GTGAGTTAGCCG<br>TTTAGCGA        | CAGATCGCAACC<br>ACTGCG      | TD<br>60-50 | 50     | [29] |
| DYS389I           | (TCTG) <sub>3</sub> (TCTA) <sub>6-14</sub>                                                                                                                     | 5.51 x 10 <sup>-3</sup> | 2.72 x 10 <sup>-3</sup> –<br>9.74x10 <sup>-3</sup> | 4/5  | 9  | 1751 | Yfiler                          | Yfiler                      | Yfiler      | Yfiler | [29] |
| DYS389II          | (TCTG) <sub>4-5</sub> (TCTA) <sub>10-14</sub> N <sub>28</sub><br>(TCTG) <sub>3</sub> (TCTA) <sub>6-14</sub>                                                    | 3.83 x 10 <sup>-3</sup> | 1.61 x 10 <sup>-3</sup> –<br>7.49x10 <sup>-3</sup> | 2/4  | 6  | 1743 | Yfiler                          | Yfiler                      | Yfiler      | Yfiler | [29] |
| DYS390            | (TCTG) <sub>8</sub> (TCTA) <sub>9-4</sub> (TCTG) <sub>1</sub><br>(TCTG) <sub>4</sub>                                                                           | 1.52 x 10 <sup>-3</sup> | 3.52 x 10 <sup>-4</sup> –<br>4.09x10 <sup>-3</sup> | 0/2  | 2  | 1758 | Yfiler                          | Yfiler                      | Yfiler      | Yfiler | [29] |
| DYS391            | (TCTG) <sub>3</sub> (TCTA) <sub>6-15</sub>                                                                                                                     | 3.23 x 10 <sup>-3</sup> | 1.26 x 10 <sup>-3</sup> –<br>6.65x10 <sup>-3</sup> | 3/2  | 5  | 1759 | Yfiler                          | Yfiler                      | Yfiler      | Yfiler | [29] |
| DYS392            | (TAT) <sub>4-20</sub>                                                                                                                                          | 9.70 x 10 <sup>-4</sup> | 1.43 x 10 <sup>-4</sup> –<br>3.23x10 <sup>-3</sup> | 1/0  | 1  | 1728 | Yfiler                          | Yfiler                      | Yfiler      | Yfiler | [29] |
| DYS393/<br>DYS395 | (AGAT) <sub>7-18</sub>                                                                                                                                         | 2.11 x 10 <sup>-3</sup> | 6.21 x 10 <sup>-4</sup> –<br>5.00x10 <sup>-3</sup> | 2/1  | 3  | 1750 | Yfiler                          | Yfiler                      | Yfiler      | Yfiler | [29] |
| DYS425/<br>DYF371 | (TGT) <sub>8-14</sub>                                                                                                                                          | 1.51 x 10 <sup>-3</sup> | 3.48 x 10 <sup>-4</sup> –<br>4.08x10 <sup>-3</sup> | 1/1  | 2  | 1778 | TGGAGAGAAGA<br>AGAGAGAAAT       | AGTAATTCTGGA<br>GGTAAAAATGG | TD<br>60-50 | 20     | [29] |
| DYS426            | (GTT) <sub>9-12</sub>                                                                                                                                          | 3.98 x 10 <sup>-4</sup> | 1.49 x 10 <sup>-5</sup> –<br>2.11x10 <sup>-3</sup> | 0/0  | 0  | 1735 | CTCAAAGTATGA<br>AAGCATGACCA     | GGTGACAAGAC<br>GAGACTTTGTG  | TD<br>70-50 | 38     | [29] |
| DYS434            | (ATCT) <sub>9-12</sub>                                                                                                                                         | 4.04 x 10 <sup>-4</sup> | 1.47 x 10 <sup>-5</sup> –<br>2.14x10 <sup>-3</sup> | 0/0  | 0  | 1715 | CACTCCCTGAGT<br>GCTGGATT        | GGAGATGAATG<br>AATGGATGGA   | TD<br>60-50 | 40     | [29] |
| DYS435            | (TGGA) <sub>10-12</sub>                                                                                                                                        | 1.00 x 10 <sup>-3</sup> | 1.47 x 10 <sup>-4</sup> –<br>3.33x10 <sup>-3</sup> | 0/1  | 1  | 1676 | AGCATCTCCACA<br>CAGCACAC        | TTCTCTCTCCCC<br>CTCCTCTC    | TD<br>60-50 | 41     | [29] |
| DYS436            | (GTT) <sub>11-13</sub>                                                                                                                                         | 3.84 x 10 <sup>-4</sup> | 1.38 x 10 <sup>-5</sup> –<br>2.05x10 <sup>-3</sup> | 0/0  | 0  | 1798 | CCAGGAGAGCA<br>CACACAAAA        | GCAATCCAACCT<br>CAGCCAAT    | TD<br>60-50 | 18     | [29] |
| DYS437            | (TCTA) <sub>4-12</sub> (TCTG) <sub>2</sub> (TCTA) <sub>4</sub>                                                                                                 | 1.53 x 10 <sup>-3</sup> | 3.54 x 10 <sup>-4</sup> –<br>4.10x10 <sup>-3</sup> | 2/0  | 2  | 1760 | Yfiler                          | Yfiler                      | Yfiler      | Yfiler | [29] |
| DYS438            | (TTTTTC) <sub>7-16</sub>                                                                                                                                       | 9.56 x 10 <sup>-4</sup> | 1.37 x 10 <sup>-4</sup> –<br>3.18x10 <sup>-3</sup> | 0/1  | 1  | 1751 | Yfiler                          | Yfiler                      | Yfiler      | Yfiler | [29] |
| DYS439            | (GATA) <sub>3</sub> N <sub>32</sub> (GATA) <sub>5-19</sub>                                                                                                     | 3.84 x 10 <sup>-3</sup> | 1.63 x 10 <sup>-3</sup> –<br>7.54x10 <sup>-3</sup> | 2/4  | 6  | 1736 | Yfiler                          | Yfiler                      | Yfiler      | Yfiler | [29] |
| DYS441            | (TTCC) <sub>12-21.2</sub>                                                                                                                                      | 1.18 x 10 <sup>-3</sup> | 1.66 x 10 <sup>-4</sup> –<br>3.93x10 <sup>-3</sup> | 1/0  | 1  | 1419 | ATGTACCTGTAG<br>CCCCAGTGAAC     | AAGTTGCAGTGA<br>GCGAAGATTG  | TD<br>70-50 | 27     | [45] |
| DYS442            | (GATA) <sub>9-16</sub> (GACA) <sub>3</sub>                                                                                                                     | 9.78 x 10 <sup>-3</sup> | 5.59 x 10 <sup>-3</sup> –<br>1.57x10 <sup>-2</sup> | 2/12 | 14 | 1497 | AAACGCCCATC<br>AATCAATGAGT<br>G | CCCCAAGTCCCC<br>AAAGTGTGT   | TD<br>70-50 | 16     | [45] |
| DYS443            | (TTCC) <sub>11-17</sub> (CTT) <sub>3</sub>                                                                                                                     | 2.10 x 10 <sup>-3</sup> | 6.24 x 10 <sup>-4</sup> –<br>5.01x10 <sup>-3</sup> | 2/1  | 3  | 1745 | GAGTTCATGCTG<br>ATGACAAGC       | TCATTGGCCACC<br>TGACATTA    | TD<br>70-50 | 29     | [29] |
| DYS444            | (TAGA) <sub>9-16</sub>                                                                                                                                         | 5.45 x 10 <sup>-3</sup> | 2.68 x 10 <sup>-3</sup> –<br>9.65x10 <sup>-3</sup> | 3/6  | 9  | 1775 | TGTGAACCATTT<br>GGCATGTT        | TCACGTTGTTCA<br>AGGGTCAA    | TD<br>60-50 | 45     | [29] |

|        |                                                                                                                                                                                                                   |                         |                                                    |      |    |      |                                      |                                    |                  |                  |      |
|--------|-------------------------------------------------------------------------------------------------------------------------------------------------------------------------------------------------------------------|-------------------------|----------------------------------------------------|------|----|------|--------------------------------------|------------------------------------|------------------|------------------|------|
| DYS445 | (TTTA) <sub>6-14</sub>                                                                                                                                                                                            | 2.16 x 10 <sup>-3</sup> | 6.38 x 10 <sup>-4</sup> –<br>5.15x10 <sup>-3</sup> | 2/1  | 3  | 1704 | GAGCTGAGATT<br>ATGCCACCAAA<br>A      | AGTTAAGAGCCC<br>CACCTTCCTG         | TD<br>70-50      | 32               | [45] |
| DYS446 | (TCTCT) <sub>8-21</sub>                                                                                                                                                                                           | 2.67 x 10 <sup>-3</sup> | 9.38 x 10 <sup>-4</sup> –<br>5.87x10 <sup>-3</sup> | 2/2  | 4  | 1747 | TATTTTCAGTCT<br>TGTCCCTGTC           | AAATGTATGGCC<br>AACATAGCAAA<br>ACC | TD<br>70-50      | 30               | [45] |
| DYS447 | (TTATA) <sub>6-7</sub> (TTATT) <sub>1</sub><br>(TTATA) <sub>8-13</sub> (TTATT) <sub>1</sub><br>(TTATA) <sub>5-9</sub>                                                                                             | 2.12 x 10 <sup>-3</sup> | 6.28 x 10 <sup>-4</sup> –<br>5.11x10 <sup>-3</sup> | 1/2  | 3  | 1722 | GGGCTTGCTTTG<br>CGTTATCT             | GGTCACAGCATG<br>GCTTGGTT           | TD<br>70-50      | 27               | [45] |
| DYS448 | (AGAGAT) <sub>11-13</sub> N <sub>42</sub><br>(AGAGAT) <sub>8,9</sub>                                                                                                                                              | 3.94 x 10 <sup>-4</sup> | 1.41 x 10 <sup>-5</sup> –<br>2.11x10 <sup>-3</sup> | 0/0  | 0  | 1747 | Yfiler                               | Yfiler                             | Yfiler<br>Yfiler | Yfiler<br>Yfiler | [45] |
| DYS449 | (TTCT) <sub>13-9</sub> N <sub>22</sub> (TTCT) <sub>3</sub> N <sub>12</sub><br>(TTCT) <sub>13-19</sub>                                                                                                             | 1.22 x 10 <sup>-2</sup> | 7.54 x 10 <sup>-3</sup> –<br>1.85x10 <sup>-2</sup> | 14/5 | 19 | 1617 | TGGAGTCTCTCA<br>AGCCTGTTC            | CCATTGCACTCT<br>AGGTTGGAC          | TD<br>60-50      | 46               | [29] |
| DYS450 | (TTTTA) <sub>7-11</sub> N <sub>12</sub> (TTTTA) <sub>3</sub>                                                                                                                                                      | 1.04 x 10 <sup>-3</sup> | 1.54 x 10 <sup>-4</sup> –<br>3.50x10 <sup>-3</sup> | 0/1  | 1  | 1598 | GCCTTTCCAATT<br>TCAATTTCTGA          | TGGAATATGATG<br>CAGCTGTTTGT        | TD<br>70-50      | 39               | [45] |
| DYS452 | (TATAC) <sub>5-4</sub><br>[(CATAC) <sub>1</sub> (TATAC) <sub>1</sub> ] <sub>2-4</sub><br>N <sub>20</sub> (TATAC) <sub>3</sub> (CATAC) <sub>1</sub><br>(TATAC) <sub>3</sub>                                        | 4.02 x 10 <sup>-3</sup> | 1.56 x 10 <sup>-3</sup> –<br>8.28x10 <sup>-3</sup> | 2/3  | 5  | 1411 | TTTATTATACTC<br>AGCTAATTAATT<br>GGTT | GTGGTGTCTGA<br>TGAGGATAAT          | TD<br>70-50      | 16               | [45] |
| DYS453 | (AAAT) <sub>9-15</sub>                                                                                                                                                                                            | 3.89 x 10 <sup>-4</sup> | 1.43 x 10 <sup>-5</sup> –<br>2.08x10 <sup>-3</sup> | 0/0  | 0  | 1782 | GGGTAACAGAA<br>CAAGACAGT             | CTAAAAGTATGG<br>ATATTCTTCG         | TD<br>60-50      | 45               | [45] |
| DYS454 | (AAAT) <sub>7-13</sub>                                                                                                                                                                                            | 4.75 x 10 <sup>-4</sup> | 1.71 x 10 <sup>-5</sup> –<br>2.55x10 <sup>-3</sup> | 0/0  | 0  | 1458 | TCACAATGACCC<br>TTTTGTGC             | GTTCTTTGGCCC<br>TGCATTTA           | TD<br>60-50      | 46               | [29] |
| DYS455 | (ATTT) <sub>6,2-11</sub>                                                                                                                                                                                          | 4.26 x 10 <sup>-4</sup> | 1.59 x 10 <sup>-5</sup> –<br>2.28x10 <sup>-3</sup> | 0/0  | 0  | 1618 | ATCTGAGCCGA<br>GAGAATGATA            | GGGGTGGAAAC<br>GAGTGTT             | TD<br>70-50      | 39               | [45] |
| DYS456 | (AGAT) <sub>11-23</sub>                                                                                                                                                                                           | 4.94 x 10 <sup>-3</sup> | 2.35 x 10 <sup>-3</sup> –<br>8.97x10 <sup>-3</sup> | 6/2  | 8  | 1757 | Yfiler                               | Yfiler                             | Yfiler<br>Yfiler | Yfiler<br>Yfiler | [45] |
| DYS458 | (GAAA) <sub>11-24</sub>                                                                                                                                                                                           | 8.36 x 10 <sup>-3</sup> | 4.80 x 10 <sup>-3</sup> –<br>1.34x10 <sup>-2</sup> | 7/7  | 14 | 1756 | Yfiler                               | Yfiler                             | Yfiler<br>Yfiler | Yfiler<br>Yfiler | [45] |
| DYS459 | (ATTT) <sub>6-11</sub>                                                                                                                                                                                            | 2.67 x 10 <sup>-3</sup> | 9.36 x 10 <sup>-4</sup> –<br>5.86x10 <sup>-3</sup> | 2/2  | 4  | 1741 | CAGGTGAACTG<br>GGGTAAATAAT           | TTGAGCAACAG<br>AGCAAGACTTA         | TD<br>70-50      | 27               | [45] |
| DYS460 | (TAGA) <sub>8-13</sub>                                                                                                                                                                                            | 6.22 x 10 <sup>-3</sup> | 3.19 x 10 <sup>-3</sup> –<br>1.07x10 <sup>-2</sup> | 2/8  | 10 | 1717 | GCCAAACTCTTT<br>CCAAGAAG             | TCTATCCTCTGC<br>CTATCATTTATT<br>A  | TD<br>60-50      | 20               | [29] |
| DYS461 | (TAGA) <sub>8-13</sub>                                                                                                                                                                                            | 9.89 x 10 <sup>-4</sup> | 1.40 x 10 <sup>-4</sup> –<br>3.29x10 <sup>-3</sup> | 0/1  | 1  | 1695 | AGGCAGAGGAT<br>AGATGATATGG<br>AT     | TTCAGGTAAATC<br>TGTCCAGTAGTG<br>A  | TD<br>60-50      | 19               | [29] |
| DYS462 | (CATA) <sub>9-14</sub>                                                                                                                                                                                            | 2.65 x 10 <sup>-3</sup> | 9.20 x 10 <sup>-4</sup> –<br>5.80x10 <sup>-3</sup> | 1/3  | 4  | 1771 | TGTGCTGTACCA<br>GTTGCCTA             | CCAGCCTGAGCA<br>AGAGAGTA           | TD<br>70-50      | 30               | [45] |
| DYS463 | (AAAGG) <sub>6-7</sub> (AAGGG) <sub>9-19</sub>                                                                                                                                                                    | 1.51 x 10 <sup>-3</sup> | 3.49 x 10 <sup>-4</sup> –<br>4.07x10 <sup>-3</sup> | 2/0  | 2  | 1776 | AATTCTAGGTTT<br>GAGCAAAGACA          | ATGAGGTTGTGT<br>GACTTGACTG         | TD<br>70-50      | 33               | [45] |
| DYS464 | (CCTT) <sub>9-20</sub> N <sub>46</sub><br>(CCTT) <sub>3</sub> N <sub>8</sub> (CCTT) <sub>4</sub>                                                                                                                  | 7.27 x 10 <sup>-3</sup> | 3.96 x 10 <sup>-3</sup> –<br>1.20x10 <sup>-2</sup> | 5/7  | 12 | 1745 | TTACGAGCTTTG<br>GGCTATG              | CCTGGGTAACAG<br>AGAGACTCTT         | TD<br>70-50      | 31               | [45] |
| DYS468 | (CTG) <sub>4</sub> N <sub>44</sub> (CCT) <sub>3</sub> N <sub>40</sub> (CTT) <sub>3</sub> N <sub>35</sub><br>(CCT) <sub>4</sub> N <sub>8</sub> (CTC) <sub>4</sub><br>(CTT) <sub>7-9</sub> (ATTCAT) <sub>8-10</sub> | 1.74 x 10 <sup>-3</sup> | 4.03 x 10 <sup>-4</sup> –<br>4.69x10 <sup>-3</sup> | 1/1  | 2  | 1535 | GGGAGTTCCAA<br>ACTTTTTTCA            | GGGGGAAGATG<br>ACAATGATG           | TD<br>70-50      | 37               | [29] |
| DYS469 | (CTT) <sub>3</sub> N <sub>39</sub> (CTT) <sub>4</sub> (GTT) <sub>1</sub> (CTT) <sub>10</sub>                                                                                                                      | 2.99 x 10 <sup>-3</sup> | 1.04 x 10 <sup>-3</sup> –                          | 3/1  | 4  | 1555 | TTTGGGGACTGA                         | CCCCAGCTGGTA                       | TD               | 41               | [29] |

|        |                                                                                                                                                                                                                                        |                       |                                                  |     |   |      |                            |                             |             |    |      |
|--------|----------------------------------------------------------------------------------------------------------------------------------------------------------------------------------------------------------------------------------------|-----------------------|--------------------------------------------------|-----|---|------|----------------------------|-----------------------------|-------------|----|------|
|        | ${}_{30}\text{T}(\text{CTT})_3\text{N}_{17}(\text{CTT})_5\text{N}_{37}(\text{CTT})_3$<br>$\text{N}_{12}(\text{CTT})_4\text{N}_{12}(\text{CTT})_3\text{N}_{12}(\text{CTT})_5$<br>$(\text{CCT})_4\text{N}_9(\text{CTT})_3(\text{CCT})_3$ |                       | $6.54 \times 10^{-3}$                            |     |   |      | ATTCAAAA                   | AAATGAGT                    | 60-50       |    |      |
| DYS470 | $(\text{GTT})_{8-12}\text{N}_{33}(\text{GTT})_3$                                                                                                                                                                                       | $4.20 \times 10^{-4}$ | $1.51 \times 10^{-5}$ –<br>$2.23 \times 10^{-3}$ | 0/0 | 0 | 1651 | GGTCCTTCAGGA<br>ACCAGTTG   | TGGCTGTAAAAC<br>AAATATCAGCA | TD<br>60-50 | 44 | [29] |
| DYS472 | $(\text{AAT})_{7-9}$                                                                                                                                                                                                                   | $4.46 \times 10^{-4}$ | $1.62 \times 10^{-5}$ –<br>$2.37 \times 10^{-3}$ | 0/0 | 0 | 1549 | AGATTGTCCAC<br>CTGCACTC    | GAGGCACTGTGT<br>TCAGCAAA    | TD<br>70-50 | 1  | [29] |
| DYS473 | $(\text{AAT})_8\text{N}_{12}(\text{AAT})_{9-13}$                                                                                                                                                                                       | $4.13 \times 10^{-4}$ | $1.47 \times 10^{-5}$ –<br>$2.21 \times 10^{-3}$ | 0/0 | 0 | 1676 | CAGCCTGGATA<br>GCAGAGTGA   | CCTCTTTTCTTTG<br>CTGGTTCCTT | TD<br>60-50 | 44 | [29] |
| DYS474 | $(\text{AAC})_{9-10}$                                                                                                                                                                                                                  | $3.92 \times 10^{-4}$ | $1.41 \times 10^{-5}$ –<br>$2.08 \times 10^{-3}$ | 0/0 | 0 | 1766 | CCCCTGAACTTA<br>AAAGGTGGA  | GGCATCTAGGTT<br>TACTGTGAGGA | TD<br>60-50 | 22 | [29] |
| DYS475 | $(\text{TAA})_{7-9}(\text{CAA})_1(\text{TAA})_3$                                                                                                                                                                                       | $4.14 \times 10^{-4}$ | $1.54 \times 10^{-5}$ –<br>$2.21 \times 10^{-3}$ | 0/0 | 0 | 1681 | CCCACCAAGGG<br>TTTTCAGA    | CCCACAGAAAG<br>ATGTTGAGG    | TD<br>60-50 | 23 | [29] |
| DYS476 | $(\text{TGA})_{7-13}$                                                                                                                                                                                                                  | $9.40 \times 10^{-4}$ | $1.35 \times 10^{-4}$ –<br>$3.12 \times 10^{-3}$ | 1/0 | 1 | 1779 | CGACTATGATTT<br>GGGCTGTG   | AGCTGGGAAGT<br>ACTCAATGCTC  | TD<br>70-50 | 7  | [29] |
| DYS477 | $(\text{TTG})_{8-9}$                                                                                                                                                                                                                   | $3.91 \times 10^{-4}$ | $1.37 \times 10^{-5}$ –<br>$2.07 \times 10^{-3}$ | 0/0 | 0 | 1765 | TAACTTACAGAA<br>AAGCTCAGGG | AAGTGAATCGA<br>GTGCCTAGC    | TD<br>60-50 | 42 | [29] |
| DYS478 | $(\text{CAG})_4(\text{CAA})_1(\text{CAG})_8$                                                                                                                                                                                           | $4.04 \times 10^{-4}$ | $1.46 \times 10^{-5}$ –<br>$2.17 \times 10^{-3}$ | 0/0 | 0 | 1718 | ACAGGCAACAA<br>ATTGGGTA    | TCAGGATAAGCT<br>AGCAGTCTATG | TD<br>60-50 | 20 | [29] |
| DYS480 | $(\text{TTA})_{6-10}$                                                                                                                                                                                                                  | $3.91 \times 10^{-4}$ | $1.44 \times 10^{-5}$ –<br>$2.09 \times 10^{-3}$ | 0/0 | 0 | 1783 | CCAGCACCTAG<br>GTTGAGGTA   | CAGCACTCCAAA<br>ATGACAGA    | TD<br>70-50 | 9  | [29] |
| DYS481 | $(\text{CTT})_{22-32}$                                                                                                                                                                                                                 | $4.97 \times 10^{-3}$ | $2.36 \times 10^{-3}$ –<br>$9.03 \times 10^{-3}$ | 3/5 | 8 | 1744 | AGGAATGTGGC<br>TAACGTGTG   | ACAGCTCACCAG<br>AAGTTGC     | TD<br>70-50 | 12 | [29] |
| DYS484 | $(\text{AAT})_{10-16}\text{N}_{12}(\text{AAT})_3(\text{TAT})_3$                                                                                                                                                                        | $2.61 \times 10^{-3}$ | $9.09 \times 10^{-4}$ –<br>$5.73 \times 10^{-3}$ | 2/2 | 4 | 1792 | CCTATCATCCGC<br>ATGGACTT   | CCTGGTTGACAA<br>AGCCAGAT    | TD<br>60-50 | 21 | [29] |
| DYS485 | $(\text{TTT})_{0-1}(\text{TAA})_{11-21}$                                                                                                                                                                                               | $4.04 \times 10^{-4}$ | $1.53 \times 10^{-5}$ –<br>$2.13 \times 10^{-3}$ | 0/0 | 0 | 1730 | AAAGCAGACTT<br>CGCCACTACA  | AAAAATTAGCTG<br>GGCCTGGT    | TD<br>70-50 | 9  | [29] |
| DYS487 | $(\text{AAT})_{10-16}$                                                                                                                                                                                                                 | $1.77 \times 10^{-3}$ | $4.08 \times 10^{-4}$ –<br>$4.78 \times 10^{-3}$ | 1/1 | 2 | 1511 | TGTGGGAGGCC<br>TAAGAAAA    | CCTGGGCAACA<br>GAGAAAGAC    | TD<br>70-50 | 1  | [29] |
| DYS488 | $(\text{ATA})_{10-16}$                                                                                                                                                                                                                 | $4.40 \times 10^{-4}$ | $1.60 \times 10^{-5}$ –<br>$2.32 \times 10^{-3}$ | 0/0 | 0 | 1576 | GGGGAGGGATA<br>GCATTAGGA   | TACCCTGGTCCA<br>CTTCAACC    | TD<br>70-50 | 3  | [29] |
| DYS489 | $(\text{TAA})_{10-15}$                                                                                                                                                                                                                 | $4.48 \times 10^{-4}$ | $1.66 \times 10^{-5}$ –<br>$2.38 \times 10^{-3}$ | 0/0 | 0 | 1552 | ACCCAAAGATTT<br>GTCGGCTA   | AAAATTAGCCG<br>AGCATGGTG    | TD<br>70-50 | 37 | [29] |
| DYS490 | $(\text{TAA})_{8-16}$                                                                                                                                                                                                                  | $3.95 \times 10^{-4}$ | $1.48 \times 10^{-5}$ –<br>$2.10 \times 10^{-3}$ | 0/0 | 0 | 1759 | CCTGGCAGGAA<br>TTATCCAGA   | GCAGAGCTTGCA<br>CTGAGCT     | TD<br>70-50 | 10 | [29] |
| DYS491 | $(\text{ATA})_{8-14}$                                                                                                                                                                                                                  | $4.09 \times 10^{-4}$ | $1.45 \times 10^{-5}$ –<br>$2.17 \times 10^{-3}$ | 0/0 | 0 | 1706 | GGAATGGGGAG<br>GGATAACAT   | GGAGAAAATTC<br>AATGCAGATACC | TD<br>70-50 | 15 | [29] |
| DYS492 | $(\text{ATA})_{9-15}$                                                                                                                                                                                                                  | $3.92 \times 10^{-4}$ | $1.45 \times 10^{-5}$ –<br>$2.09 \times 10^{-3}$ | 0/0 | 0 | 1770 | AGATGAGCCAG<br>GCTTCAGAC   | AGTAGGGGTCA<br>GGCACAATG    | TD<br>70-50 | 7  | [29] |
| DYS493 | $(\text{AAC})_{8-11}$                                                                                                                                                                                                                  | $3.86 \times 10^{-4}$ | $1.45 \times 10^{-5}$ –<br>$2.06 \times 10^{-3}$ | 0/0 | 0 | 1800 | ACTCCAGTCTGG<br>GTGGACAG   | CCCTGGGATTAT<br>AGGCATGA    | TD<br>70-50 | 36 | [29] |
| DYS494 | $(\text{TA})_{4-6}(\text{TAA})_{7-11}$                                                                                                                                                                                                 | $3.89 \times 10^{-4}$ | $1.43 \times 10^{-5}$ –<br>$2.07 \times 10^{-3}$ | 0/0 | 0 | 1783 | TTGCAACACTGT<br>TCATTTGGA  | AACAAACCTGC<br>ATGTTCTTCAA  | TD<br>70-50 | 11 | [29] |
| DYS495 | $(\text{AAT})_{12-19}$                                                                                                                                                                                                                 | $2.09 \times 10^{-3}$ | $6.19 \times 10^{-4}$ –<br>$4.97 \times 10^{-3}$ | 2/1 | 3 | 1755 | CCCAGCTATTCA<br>GGAGGTTG   | GCCAGAAAGTG<br>TGAGTCATCC   | TD<br>70-50 | 10 | [29] |
| DYS497 | $(\text{TAA})_{9-16}$                                                                                                                                                                                                                  | $1.49 \times 10^{-3}$ | $3.46 \times 10^{-4}$ –<br>$4.05 \times 10^{-3}$ | 1/1 | 2 | 1786 | AACATGTGCGTT<br>TTCAACCA   | GCATGTTGTGCA<br>CATGTAACC   | TD<br>70-50 | 13 | [29] |

|         |                                                                                                                                                                                                                                                                                              |                         |                                                    |      |    |      |                            |                            |             |    |      |
|---------|----------------------------------------------------------------------------------------------------------------------------------------------------------------------------------------------------------------------------------------------------------------------------------------------|-------------------------|----------------------------------------------------|------|----|------|----------------------------|----------------------------|-------------|----|------|
| DYS499  | (TTG) <sub>8</sub>                                                                                                                                                                                                                                                                           | 3.93 x 10 <sup>-4</sup> | 1.40 x 10 <sup>-5</sup> –<br>2.09x10 <sup>-3</sup> | 0/0  | 0  | 1771 | TGGGTCAGAGA<br>AAGGATTGC   | GGAGGAAGAGG<br>TTGCAATGA   | TD<br>70-50 | 47 | [29] |
| DYS502  | (AAT) <sub>4</sub> (TGC) <sub>1</sub> (CAT) <sub>6-9</sub>                                                                                                                                                                                                                                   | 3.85 x 10 <sup>-4</sup> | 1.43 x 10 <sup>-5</sup> –<br>2.05x10 <sup>-3</sup> | 0/0  | 0  | 1792 | CAGCAAGCCAC<br>CATACCATA   | TGTGCTTTTGGGA<br>GTTTGGAG  | TD<br>70-50 | 34 | [29] |
| DYS504  | (CCTT) <sub>10-20</sub> N <sub>7</sub> (CCCT) <sub>3</sub>                                                                                                                                                                                                                                   | 3.24 x 10 <sup>-3</sup> | 1.26 x 10 <sup>-3</sup> –<br>6.62x10 <sup>-3</sup> | 1/4  | 5  | 1746 | TCTACACCACTG<br>TGCCAAGC   | GGCAACAGAGC<br>AACCTCT     | TD<br>70-50 | 8  | [29] |
| DYS505  | (TCCT) <sub>9-15</sub>                                                                                                                                                                                                                                                                       | 1.51 x 10 <sup>-3</sup> | 3.50 x 10 <sup>-4</sup> –<br>4.07x10 <sup>-3</sup> | 1/1  | 2  | 1760 | TCTGGCGAAGTA<br>ACCCAAAC   | TCGAGTCAGTTC<br>ACCAGAAGG  | TD<br>70-50 | 6  | [29] |
| DYS508  | (TATC) <sub>8-15</sub>                                                                                                                                                                                                                                                                       | 3.03 x 10 <sup>-3</sup> | 1.05 x 10 <sup>-3</sup> –<br>6.63x10 <sup>-3</sup> | 2/2  | 4  | 1544 | ACAATGGCAAT<br>CCCAAATTC   | GAACAAATAAG<br>GTGGGATGGAT | TD<br>70-50 | 1  | [29] |
| DYS509  | (AAAT) <sub>7-11</sub> (AATAA) <sub>1</sub> (AAAT) <sub>3</sub>                                                                                                                                                                                                                              | 1.06 x 10 <sup>-3</sup> | 1.55 x 10 <sup>-4</sup> –<br>3.53x10 <sup>-3</sup> | 0/1  | 1  | 1590 | AACATGGTGAA<br>TCCCTGTCTCT | TGTCCCCAGGGC<br>TTTTTAAT   | TD<br>70-50 | 37 | [29] |
| DYS510  | (GATA) <sub>3</sub> N <sub>12</sub> (GATA) <sub>9-15</sub> N <sub>13</sub><br>(GGAT) <sub>4</sub> N <sub>9</sub> (GATA) <sub>3</sub>                                                                                                                                                         | 5.99 x 10 <sup>-3</sup> | 3.09 x 10 <sup>-3</sup> –<br>1.03x10 <sup>-2</sup> | 4/6  | 10 | 1779 | TTTTTCCTCCCTT<br>ACCACAGA  | TCTGGAGAAGA<br>CAGAACTGTCA | TD<br>70-50 | 34 | [29] |
| DYS511  | (GATA) <sub>9-14</sub>                                                                                                                                                                                                                                                                       | 1.52 x 10 <sup>-3</sup> | 3.51 x 10 <sup>-4</sup> –<br>4.11x10 <sup>-3</sup> | 1/1  | 2  | 1760 | GATAGGATGGG<br>GTGGATGTG   | TGTGAATCCCC<br>TTCTACATCTC | TD<br>70-50 | 13 | [29] |
| DYS512  | (AGAT) <sub>7-13</sub>                                                                                                                                                                                                                                                                       | 3.96 x 10 <sup>-4</sup> | 1.44 x 10 <sup>-5</sup> –<br>2.11x10 <sup>-3</sup> | 0/0  | 0  | 1738 | CACGCCAGCTA<br>ATTTTTGT    | GGGAGGAATAA<br>AGGAAGGTTG  | TD<br>70-50 | 26 | [29] |
| DYS513  | (TCTA) <sub>4</sub> (TCCA) <sub>1</sub> (TATC) <sub>3</sub><br>(CGTA) <sub>1</sub> (TCTA) <sub>9-15</sub>                                                                                                                                                                                    | 6.09 x 10 <sup>-3</sup> | 3.14 x 10 <sup>-3</sup> –<br>1.05x10 <sup>-2</sup> | 6/4  | 10 | 1751 | ATTGATCCATCC<br>GTCTGTCC   | GTTGGATGAAG<br>GGAGAGCAG   | TD<br>70-50 | 32 | [29] |
| DYS516  | (TTCT) <sub>4</sub> N <sub>30</sub> (TTCT) <sub>9-18</sub>                                                                                                                                                                                                                                   | 6.66 x 10 <sup>-3</sup> | 3.55 x 10 <sup>-3</sup> –<br>1.12x10 <sup>-2</sup> | 7/4  | 11 | 1753 | TTTCCAATGACC<br>AAGACGTG   | CGAACCTGCAA<br>ATTGTTTCC   | TD<br>60-50 | 22 | [29] |
| DYS517  | (AAAG) <sub>10-18</sub> N <sub>8</sub> (AAAG) <sub>3</sub>                                                                                                                                                                                                                                   | 3.21 x 10 <sup>-3</sup> | 1.25 x 10 <sup>-3</sup> –<br>6.62x10 <sup>-3</sup> | 3/2  | 5  | 1766 | TAATCGTCCCAT<br>TTTGAGCA   | TGCAATCCAAA<br>CTCAGAAA    | TD<br>60-50 | 22 | [29] |
| DYS518  | (AAAG) <sub>3</sub> (GAAG) <sub>1</sub> (AAAG) <sub>14-22</sub><br>(GGAG) <sub>1</sub> (AAAG) <sub>4</sub> N <sub>6</sub><br>(AAAG) <sub>11-19</sub> N <sub>27</sub> (AAGG) <sub>4</sub>                                                                                                     | 1.84 x 10 <sup>-2</sup> | 1.25 x 10 <sup>-2</sup> –<br>2.60x10 <sup>-2</sup> | 8/20 | 28 | 1556 | GGCAACACAAG<br>TGAAACTGC   | TCAGCTCTTACC<br>ATGGGTGAT  | TD<br>70-50 | 54 | [29] |
| DYS520  | (GATA) <sub>10-13</sub> (CATA) <sub>10-11</sub>                                                                                                                                                                                                                                              | 2.66 x 10 <sup>-3</sup> | 9.22 x 10 <sup>-4</sup> –<br>5.80x10 <sup>-3</sup> | 2/2  | 4  | 1760 | AACAGCCTGCC<br>AACATAGT    | ACCATCATGCC<br>TGCAATA     | TD<br>70-50 | 24 | [29] |
| DYS521  | (CTTT) <sub>5</sub> (TCTT) <sub>3</sub> (TTTT) <sub>1</sub><br>(CTTT) <sub>5</sub> T (CTTT) <sub>4-14</sub>                                                                                                                                                                                  | 9.54 x 10 <sup>-4</sup> | 1.37 x 10 <sup>-4</sup> –<br>3.18x10 <sup>-3</sup> | 0/1  | 1  | 1751 | GCCACGACACCT<br>GTTCAGTA   | GCTGGGAGTGA<br>GACCTGTA    | TD<br>70-50 | 24 | [29] |
| DYS522  | (ATAG) <sub>8-15</sub>                                                                                                                                                                                                                                                                       | 1.04 x 10 <sup>-3</sup> | 1.53 x 10 <sup>-4</sup> –<br>3.44x10 <sup>-3</sup> | 1/0  | 1  | 1620 | CCTTTGAAATCA<br>TTCATAATGC | TCATAAACAGA<br>GGGTTCTGG   | TD<br>70-50 | 4  | [29] |
| DYS525  | (AGAT) <sub>8-13</sub>                                                                                                                                                                                                                                                                       | 9.78 x 10 <sup>-4</sup> | 1.42 x 10 <sup>-4</sup> –<br>3.26x10 <sup>-3</sup> | 0/1  | 1  | 1712 | ATTCACACCATT<br>GCACTCCA   | CCATCTGTTTAT<br>CTTCCCATCA | TD<br>70-50 | 2  | [29] |
| DYS526a | (CCTT) <sub>10-17</sub>                                                                                                                                                                                                                                                                      | 2.72 x 10 <sup>-3</sup> | 9.52 x 10 <sup>-4</sup> –<br>5.97x10 <sup>-3</sup> | 2/2  | 4  | 1716 | TCTGGTGAAGT<br>ATCCAAACC   | GGGTTACTTCGC<br>CAGAAGGT   | TD<br>65-50 | 51 | [29] |
| DYS526b | (CCCT) <sub>3</sub> N <sub>20</sub> (CTTT) <sub>11-17</sub><br>(CCTT) <sub>6-10</sub> N <sub>13</sub> (CCTT) <sub>10-17</sub>                                                                                                                                                                | 1.25 x 10 <sup>-2</sup> | 7.88 x 10 <sup>-3</sup> –<br>1.87x10 <sup>-2</sup> | 9/11 | 20 | 1651 | TCTGGTGAAGT<br>ATCCAAACC   | GGGTTACTTCGC<br>CAGAAGGT   | TD<br>65-50 | 51 | [29] |
| DYS530  | (AAAC) <sub>8-11</sub>                                                                                                                                                                                                                                                                       | 3.94 x 10 <sup>-4</sup> | 1.45 x 10 <sup>-5</sup> –<br>2.10x10 <sup>-3</sup> | 0/0  | 0  | 1760 | CAGGGTCAAAA<br>TACCCCTCC   | CTGCGGGACAAT<br>GAAACAC    | TD<br>70-50 | 15 | [29] |
| DYS531  | (AAAT) <sub>9-13</sub>                                                                                                                                                                                                                                                                       | 1.00 x 10 <sup>-3</sup> | 1.45 x 10 <sup>-4</sup> –<br>3.50x10 <sup>-3</sup> | 0/1  | 1  | 1682 | GACCCACTGGC<br>ATTCAAATC   | TGCTCCCTTCT<br>TTGTAGACG   | TD<br>70-50 | 3  | [29] |
| DYS532  | (TCCC) <sub>3</sub> N <sub>5</sub> (TTCC) <sub>5</sub> N <sub>9</sub> (TTCT) <sub>3</sub><br>(TTCC) <sub>1</sub> (TTCT) <sub>6-17</sub> N <sub>17</sub><br>(TTCT) <sub>3</sub> N <sub>13</sub> (TTCC) <sub>4</sub> N <sub>70</sub> (TTCT) <sub>3</sub><br>N <sub>6</sub> (TTCT) <sub>3</sub> | 3.24 x 10 <sup>-3</sup> | 1.13 x 10 <sup>-3</sup> –<br>7.10x10 <sup>-3</sup> | 3/1  | 4  | 1441 | TTGGTTTTATGC<br>CTTTCCT    | TAGGTGACAGA<br>GCAGGATTC   | TD<br>70-50 | 39 | [29] |

|        |                                                                                                                                                                                                                |                        |                                                   |       |    |      |                                |                                   |             |    |      |
|--------|----------------------------------------------------------------------------------------------------------------------------------------------------------------------------------------------------------------|------------------------|---------------------------------------------------|-------|----|------|--------------------------------|-----------------------------------|-------------|----|------|
| DYS533 | (TATC) <sub>9,14</sub>                                                                                                                                                                                         | 5.01 x10 <sup>-3</sup> | 2.39 x10 <sup>-3</sup> –<br>9.11x10 <sup>-3</sup> | 4/4   | 8  | 1730 | CATCTAACATCT<br>TTGTCATCTACC   | TGATCAGTTCTT<br>AACTCAACCA        | TD<br>70-50 | 5  | [29] |
| DYS534 | (CTTT) <sub>3</sub> N <sub>8</sub> (CTTT) <sub>9-20</sub> N <sub>9</sub> (CTTT) <sub>3</sub>                                                                                                                   | 6.51 x10 <sup>-3</sup> | 3.44 x10 <sup>-3</sup> –<br>1.10x10 <sup>-2</sup> | 9/2   | 11 | 1794 | CATCTACCCAAC<br>ATCCATCTA      | GACAAAGATGTT<br>AGATGAATAGA<br>CA | TD<br>60-50 | 18 | [29] |
| DYS536 | (TCCT) <sub>7-19</sub> N <sub>8</sub> (TTCT) <sub>4</sub>                                                                                                                                                      | 1.15 x10 <sup>-3</sup> | 1.66 x10 <sup>-4</sup> –<br>3.83x10 <sup>-3</sup> | 1/0   | 1  | 1453 | TTGCTTTTCTGC<br>TTCCCTTC       | ATCGCATTCCCC<br>TCTCCTAC          | 52          | 53 | [29] |
| DYS537 | (TCTA) <sub>8-13</sub>                                                                                                                                                                                         | 2.38 x10 <sup>-3</sup> | 7.12 x10 <sup>-4</sup> –<br>5.70x10 <sup>-3</sup> | 2/1   | 3  | 1539 | GGTCTCCAATTC<br>CATCCAGA       | TGGAACATGCC<br>ATTAATCA           | TD<br>70-50 | 3  | [29] |
| DYS538 | (GATA) <sub>9-13</sub>                                                                                                                                                                                         | 3.94 x10 <sup>-4</sup> | 1.47 x10 <sup>-5</sup> –<br>2.10x10 <sup>-3</sup> | 0/0   | 0  | 1765 | CCCCTGAATCAC<br>CAGAGTTC       | AACCAGCCCAA<br>ATACCCATC          | TD<br>70-50 | 31 | [29] |
| DYS539 | (TAGA) <sub>8-14</sub>                                                                                                                                                                                         | 1.00 x10 <sup>-3</sup> | 1.46 x10 <sup>-4</sup> –<br>3.32x10 <sup>-3</sup> | 0/1   | 1  | 1676 | GTTGAAGCCCTC<br>AATCTGGT       | GGTGCAGATCTC<br>CCAAATTC          | TD<br>60-50 | 19 | [29] |
| DYS540 | (TTAT) <sub>9,14</sub>                                                                                                                                                                                         | 3.30 x10 <sup>-3</sup> | 1.28 x10 <sup>-3</sup> –<br>6.79x10 <sup>-3</sup> | 2/3   | 5  | 1718 | GACCGTGACTC<br>TGGCCAAT        | CAGGAGGCTAG<br>CTCAGGAGA          | TD<br>70-50 | 7  | [29] |
| DYS541 | (TATC) <sub>10-15</sub> (TTC) <sub>1</sub> (TATC) <sub>3</sub>                                                                                                                                                 | 3.92 x10 <sup>-3</sup> | 1.65 x10 <sup>-3</sup> –<br>7.68x10 <sup>-3</sup> | 2/4   | 6  | 1700 | TTCTATCTGTTC<br>ATCCATCTAGG    | ACCTTTAAGAAG<br>CCTTCACC          | TD<br>60-50 | 20 | [29] |
| DYS543 | (AGAT) <sub>3</sub> (GATA) <sub>7,2-16</sub> N <sub>42</sub><br>(ATGT) <sub>3-4</sub> (ATGG) <sub>2,3</sub> N <sub>35</sub><br>(GAAA) <sub>3</sub>                                                             | 7.10 x10 <sup>-3</sup> | 3.77 x10 <sup>-3</sup> –<br>3.53x10 <sup>-3</sup> | 4/7   | 11 | 1645 | CAAGGGCCAAT<br>TATGTATGT       | TGATCTTCCTGG<br>TCACCTTT          | TD<br>60-50 | 23 | [29] |
| DYS544 | (TAGA) <sub>3</sub> N <sub>15</sub> (TAGA) <sub>3</sub> (TGGA) <sub>1</sub><br>(TAGA) <sub>6-12</sub>                                                                                                          | 3.96 x10 <sup>-4</sup> | 1.44 x10 <sup>-5</sup> –<br>1.20x10 <sup>-2</sup> | 0/0   | 0  | 1748 | CTGGGCAACAG<br>AGCAAGATT       | AATGCTGGCCAA<br>AACAAAGT          | TD<br>70-50 | 32 | [29] |
| DYS545 | (TGTT) <sub>8-11</sub>                                                                                                                                                                                         | 3.90 x10 <sup>-4</sup> | 1.39 x10 <sup>-5</sup> –<br>2.09x10 <sup>-3</sup> | 0/0   | 0  | 1779 | GAGGGGAGTGT<br>AGAAAAGATGC     | GATCCAAGATG<br>GTGCCATTG          | TD<br>70-50 | 30 | [29] |
| DYS546 | (TTCC) <sub>3</sub> N <sub>23</sub> (TTCT) <sub>3</sub> N <sub>33</sub> (TTCC) <sub>3</sub><br>N <sub>16</sub> (TTCT) <sub>9,19</sub>                                                                          | 4.35 x10 <sup>-3</sup> | 1.85 x10 <sup>-3</sup> –<br>8.56x10 <sup>-3</sup> | 2/4   | 6  | 1531 | CCTGAGCTATTT<br>TCCCTTTGC      | TGCAGTACATCC<br>TGGGGAAT          | TD<br>70-50 | 35 | [29] |
| DYS547 | (CCTT) <sub>9-13</sub> T(CTTC) <sub>4-5</sub> N <sub>56</sub><br>(TTTC) <sub>10-22</sub> N <sub>10</sub> (CCTT) <sub>4</sub> (TCTC) <sub>1</sub><br>(TTTC) <sub>9-16</sub> N <sub>14</sub> (TTTC) <sub>3</sub> | 2.36 x10 <sup>-2</sup> | 1.70 x10 <sup>-2</sup> –<br>3.18x10 <sup>-2</sup> | 22/17 | 39 | 1679 | TCCATGTTACTG<br>CAAAATACAC     | TGACAGAGCAT<br>AAACGTGTC          | TD<br>60-50 | 17 | [29] |
| DYS549 | (GATA) <sub>9-15</sub>                                                                                                                                                                                         | 4.55 x10 <sup>-3</sup> | 2.05 x10 <sup>-3</sup> –<br>8.58x10 <sup>-3</sup> | 1/6   | 7  | 1684 | AACCAAATTC<br>GGGATGTACTG<br>A | GTCCCCTTTTCC<br>ATTTGTGA          | TD<br>70-50 | 15 | [29] |
| DYS550 | (AAGG) <sub>4</sub> N <sub>16</sub> (AAGG) <sub>4</sub> (AAAG) <sub>1</sub><br>(AAGG) <sub>6-11</sub>                                                                                                          | 3.87 x10 <sup>-4</sup> | 1.41 x10 <sup>-5</sup> –<br>2.06x10 <sup>-3</sup> | 0/0   | 0  | 1794 | GCCTGGGTAAC<br>AGGAGTGAA       | AGCTGAAAAC<br>GTGCTGCTG           | TD<br>70-50 | 34 | [29] |
| DYS551 | (AGAT) <sub>10-16</sub> N <sub>8</sub> (AGAC) <sub>3</sub><br>(AGGT) <sub>1</sub> (AGAT) <sub>4</sub>                                                                                                          | 3.26 x10 <sup>-3</sup> | 1.26 x10 <sup>-3</sup> –<br>6.72x10 <sup>-3</sup> | 1/4   | 5  | 1737 | CCAGCCTGGGTG<br>ACAAAGTA       | AAAGTTCCTCCC<br>AGTTGCAC          | TD<br>70-50 | 38 | [29] |
| DYS552 | (TCTA) <sub>3</sub> (TCTG) <sub>1</sub> (TCTA) <sub>7-12</sub> N <sub>40</sub><br>(TCTA) <sub>11-16</sub>                                                                                                      | 2.69 x10 <sup>-3</sup> | 9.21 x10 <sup>-4</sup> –<br>5.87x10 <sup>-3</sup> | 3/1   | 4  | 1742 | CCATAGTGCCGA<br>GGTCAAGT       | AACACCTGATGC<br>CTGGTTG           | TD<br>70-50 | 38 | [29] |
| DYS554 | (TAAA) <sub>8-11</sub>                                                                                                                                                                                         | 9.41 x10 <sup>-4</sup> | 1.36 x10 <sup>-4</sup> –<br>3.15x10 <sup>-3</sup> | 1/0   | 1  | 1777 | CTGGGCCACAG<br>AGTGAGAC        | GGGCCAGTCTTT<br>GCAATATC          | TD<br>70-50 | 13 | [29] |
| DYS556 | (AAAT) <sub>8-12</sub>                                                                                                                                                                                         | 1.59 x10 <sup>-3</sup> | 3.70 x10 <sup>-4</sup> –<br>4.30x10 <sup>-3</sup> | 1/1   | 2  | 1683 | TGCTGTACATC<br>ACCAATGA        | TTTGGTTGCTGA<br>AGCATTGA          | TD<br>70-50 | 14 | [29] |
| DYS557 | (TTTC) <sub>4</sub> (TTCTC) <sub>1</sub> (TTTC) <sub>4</sub><br>(TTC) <sub>1</sub> (TTTC) <sub>12-21</sub>                                                                                                     | 3.80 x10 <sup>-3</sup> | 1.60 x10 <sup>-3</sup> –<br>7.45x10 <sup>-3</sup> | 3/3   | 6  | 1758 | TTTTCTGTGCCA<br>AGCCTACA       | TCTAATGCACCT<br>TGAGGGATG         | TD<br>60-50 | 21 | [29] |
| DYS558 | (TTTG) <sub>3</sub> (TTTA) <sub>5-10</sub>                                                                                                                                                                     | 3.98 x10 <sup>-4</sup> | 1.42 x10 <sup>-5</sup> –<br>2.13x10 <sup>-3</sup> | 0/0   | 0  | 1741 | GGTGGTCAGAA<br>AATCCCTCA       | GCAGGCCAATAT<br>TCACCATT          | TD<br>70-50 | 26 | [29] |
| DYS559 | (TAAA) <sub>7,9</sub>                                                                                                                                                                                          | 9.63 x10 <sup>-4</sup> | 1.40 x10 <sup>-4</sup> –<br>3.19x10 <sup>-3</sup> | 1/0   | 1  | 1750 | AGCCAAGGTCA<br>TACCACTGC       | TCGGTGAAGGC<br>ACCAATAAT          | TD<br>70-50 | 25 | [29] |

|        |                                                                                      |                        |                                                   |       |    |      |                             |                                  |             |    |      |
|--------|--------------------------------------------------------------------------------------|------------------------|---------------------------------------------------|-------|----|------|-----------------------------|----------------------------------|-------------|----|------|
| DYS561 | (GATA) <sub>9-13</sub> (GACA) <sub>4</sub>                                           | 9.41 x10 <sup>-4</sup> | 1.36 x10 <sup>-4</sup> –<br>3.11x10 <sup>-3</sup> | 0/1   | 1  | 1783 | GCCTGATGCCAT<br>CTGAAAAT    | TGATCCCAACAA<br>CTGCACTC         | TD<br>60-50 | 17 | [29] |
| DYS565 | (ATAA) <sub>9-14</sub>                                                               | 2.09 x10 <sup>-3</sup> | 6.20 x10 <sup>-4</sup> –<br>4.95x10 <sup>-3</sup> | 1/2   | 3  | 1757 | AAACCCAGGAA<br>GCAGTGTG     | CCTGGCTCAGCA<br>CATGAATA         | TD<br>70-50 | 11 | [29] |
| DYS567 | (ATAA) <sub>7-13</sub>                                                               | 4.08 x10 <sup>-4</sup> | 1.48 x10 <sup>-5</sup> –<br>2.14x10 <sup>-3</sup> | 0/0   | 0  | 1713 | GGAAAGCTGAGG<br>AAGGAGGAG   | TTATGACCGGGA<br>TCAAGTGC         | TD<br>70-50 | 10 | [29] |
| DYS568 | (AAAT) <sub>9-13</sub>                                                               | 1.08 x10 <sup>-3</sup> | 1.56 x10 <sup>-4</sup> –<br>3.60x10 <sup>-3</sup> | 0/1   | 1  | 1547 | GTGGCAGACAA<br>AACCCAGTT    | TTGAAAAGGGA<br>TGGGACTCA         | TD<br>70-50 | 3  | [29] |
| DYS569 | (ATTT) <sub>8,2-13</sub>                                                             | 1.58 x10 <sup>-3</sup> | 3.66 x10 <sup>-4</sup> –<br>4.24x10 <sup>-3</sup> | 0/2   | 2  | 1696 | TCCATGGGATAT<br>GATGAGCA    | GGCAGCCTGTAG<br>GACAGAGA         | TD<br>70-50 | 12 | [29] |
| DYS570 | (TTTC) <sub>14-24</sub>                                                              | 1.24 x10 <sup>-2</sup> | 7.52 x10 <sup>-3</sup> –<br>1.91x10 <sup>-2</sup> | 8/9   | 17 | 1426 | GAACTGTCTACA<br>ATGGCTCACG  | TCAGCATAGTCA<br>AGAAACCAGAC<br>A | TD<br>70-50 | 1  | [29] |
| DYS571 | (TTTT) <sub>4</sub> N <sub>7</sub> (TTTA) <sub>9-12</sub>                            | 4.13 x10 <sup>-4</sup> | 1.51 x10 <sup>-5</sup> –<br>2.20x10 <sup>-3</sup> | 0/0   | 0  | 1682 | AGCCTTCAGCGA<br>CTGCTTTA    | AGCTGAGATCAT<br>CCCATTGC         | TD<br>70-50 | 47 | [29] |
| DYS572 | (AAAT) <sub>8-13</sub>                                                               | 2.07 x10 <sup>-3</sup> | 6.17 x10 <sup>-4</sup> –<br>4.96x10 <sup>-3</sup> | 0/3   | 3  | 1770 | CTAAGGACGCCT<br>CCCATAACA   | CTCATTCCCTAT<br>GGTTTGCAC        | TD<br>70-50 | 9  | [29] |
| DYS573 | (TTTA) <sub>8-13</sub>                                                               | 4.10 x10 <sup>-4</sup> | 1.51 x10 <sup>-5</sup> –<br>2.17x10 <sup>-3</sup> | 0/0   | 0  | 1698 | GGGGGAGAAAA<br>AGTTTGGTG    | AAAAATGGGGA<br>GGTGGAAT          | TD<br>70-50 | 14 | [29] |
| DYS574 | (TTAT) <sub>8-12</sub>                                                               | 9.77 x10 <sup>-4</sup> | 1.43 x10 <sup>-4</sup> –<br>3.25x10 <sup>-3</sup> | 0/1   | 1  | 1721 | GGTGGGGCTTCC<br>ATATTTTT    | AATGTAGACGA<br>CGGGTTGATG        | TD<br>60-50 | 43 | [29] |
| DYS575 | (AAAT) <sub>8-11</sub>                                                               | 3.91 x10 <sup>-4</sup> | 1.47 x10 <sup>-5</sup> –<br>2.09x10 <sup>-3</sup> | 0/0   | 0  | 1764 | GGTGGTGGACA<br>TCCGTAATC    | AGTAATGGGAT<br>GCTGGGTCA         | TD<br>70-50 | 11 | [29] |
| DYS576 | (AAAG) <sub>13-22</sub>                                                              | 1.43 x10 <sup>-2</sup> | 9.41 x10 <sup>-3</sup> –<br>2.07x10 <sup>-2</sup> | 12/12 | 24 | 1727 | TTGGGCTGAGG<br>AGTTCAATC    | GGCAGTCTCATT<br>TCCTGGAG         | TD<br>70-50 | 12 | [29] |
| DYS577 | (ATTC) <sub>6-10</sub>                                                               | 4.11 x10 <sup>-4</sup> | 1.51 x10 <sup>-5</sup> –<br>2.19x10 <sup>-3</sup> | 0/0   | 0  | 1691 | TCAATGCATGTT<br>TTTCTACGTG  | GGAGGATGGTTT<br>GAACCTGA         | TD<br>60-50 | 40 | [29] |
| DYS578 | (AAAT) <sub>7-10</sub>                                                               | 9.95 x10 <sup>-4</sup> | 1.43 x10 <sup>-4</sup> –<br>3.30x10 <sup>-3</sup> | 1/0   | 1  | 1686 | GAGGCGGAACT<br>TTCAGTGAG    | GCTTCAACAACC<br>CTGGACAT         | TD<br>70-50 | 4  | [29] |
| DYS579 | (TATT) <sub>7-10</sub>                                                               | 3.94 x10 <sup>-4</sup> | 1.40 x10 <sup>-5</sup> –<br>2.10x10 <sup>-3</sup> | 0/0   | 0  | 1755 | GCCAGCAGTAG<br>ACCCAGACT    | AGGCAGAGGTT<br>GCAGTGAGT         | TD<br>70-50 | 2  | [29] |
| DYS580 | (AATA) <sub>8-10</sub>                                                               | 4.05 x10 <sup>-4</sup> | 1.47 x10 <sup>-5</sup> –<br>2.13x10 <sup>-3</sup> | 0/0   | 0  | 1725 | GCAGTGAGCCG<br>AGATCAGG     | GGAGCAAACAC<br>TGCAATTTCC        | TD<br>70-50 | 4  | [29] |
| DYS581 | (TAGG) <sub>7,9</sub>                                                                | 3.84 x10 <sup>-4</sup> | 1.43 x10 <sup>-5</sup> –<br>2.04x10 <sup>-3</sup> | 0/0   | 0  | 1807 | GTAGGGTCTTGA<br>ACAGCATACG  | CGAGCCAAGCT<br>GCTGTTAT          | TD<br>70-50 | 36 | [29] |
| DYS583 | (AAAC) <sub>7,9</sub>                                                                | 3.99 x10 <sup>-4</sup> | 1.44 x10 <sup>-5</sup> –<br>2.12x10 <sup>-3</sup> | 0/0   | 0  | 1730 | GCAGGAAAATT<br>GCTTGAACC    | CCTCATCCAATA<br>GCTCTTCCT        | TD<br>70-50 | 2  | [29] |
| DYS584 | (CAAT) <sub>7-8</sub>                                                                | 3.90 x10 <sup>-4</sup> | 1.43 x10 <sup>-5</sup> –<br>2.10x10 <sup>-3</sup> | 0/0   | 0  | 1777 | TGCAGAATGTAT<br>GGTCTTTTTGA | CTGCCAGTCTAT<br>TGCCCTTC         | TD<br>60-50 | 45 | [29] |
| DYS585 | (TTATG) <sub>8-12</sub>                                                              | 2.12 x10 <sup>-3</sup> | 6.33 x10 <sup>-4</sup> –<br>5.06x10 <sup>-3</sup> | 2/1   | 3  | 1734 | TGGAAGTATTCC<br>ACTCACTTGCT | CTCAAGTGGGG<br>AAGTCAAGG         | TD<br>60-50 | 42 | [29] |
| DYS587 | (CAATA) <sub>8-16</sub><br>[(CAGTA) <sub>1</sub> (CAATA) <sub>1</sub> ] <sub>3</sub> | 2.62 x10 <sup>-3</sup> | 9.16 x10 <sup>-4</sup> –<br>5.75x10 <sup>-3</sup> | 2/2   | 4  | 1782 | CCTAAAGCGAA<br>GAGACCATGA   | TGAAGGCCAAA<br>GAGTGAAAGA        | TD<br>60-50 | 18 | [29] |
| DYS588 | (GCATT) <sub>9-16</sub>                                                              | 3.92 x10 <sup>-4</sup> | 1.47 x10 <sup>-5</sup> –<br>2.10x10 <sup>-3</sup> | 0/0   | 0  | 1747 | GAATGCAGAAC<br>CCTCAAGGA    | AGCCTGGGTGAC<br>AGAAACAC         | TD<br>60-50 | 42 | [29] |
| DYS590 | (TTTTG) <sub>5,9</sub>                                                               | 3.91 x10 <sup>-4</sup> | 1.45 x10 <sup>-5</sup> –<br>2.06x10 <sup>-3</sup> | 0/0   | 0  | 1780 | GGGAACATAGT<br>CGGGCTGTA    | GGGTGACAGAG<br>CAAGAATCC         | TD<br>70-50 | 5  | [29] |

|        |                                                                                                                                                                                                                                                                                                                                                                                                                                                                                                                                                                                                                                      |                         |                                                    |       |    |      |                             |                            |             |    |      |
|--------|--------------------------------------------------------------------------------------------------------------------------------------------------------------------------------------------------------------------------------------------------------------------------------------------------------------------------------------------------------------------------------------------------------------------------------------------------------------------------------------------------------------------------------------------------------------------------------------------------------------------------------------|-------------------------|----------------------------------------------------|-------|----|------|-----------------------------|----------------------------|-------------|----|------|
| DYS593 | (AAAAC) <sub>4</sub> (AAAAT) <sub>7-10</sub>                                                                                                                                                                                                                                                                                                                                                                                                                                                                                                                                                                                         | 1.51 x 10 <sup>-3</sup> | 3.47 x 10 <sup>-4</sup> –<br>4.06x10 <sup>-3</sup> | 1/1   | 2  | 1775 | CTTGAACCCAGG<br>AAGCAGAC    | TTATGCCCAAGT<br>GACTGTGC   | TD<br>70-50 | 29 | [29] |
| DYS594 | (AAATA) <sub>8-13</sub>                                                                                                                                                                                                                                                                                                                                                                                                                                                                                                                                                                                                              | 1.03 x 10 <sup>-3</sup> | 1.46 x 10 <sup>-4</sup> –<br>3.41x10 <sup>-3</sup> | 1/0   | 1  | 1635 | GATGTGCCTAAT<br>GCCACAGA    | CCCTGGTGTTAA<br>TCGTGTCC   | TD<br>70-50 | 5  | [29] |
| DYS595 | (ATTTA) <sub>6-9</sub>                                                                                                                                                                                                                                                                                                                                                                                                                                                                                                                                                                                                               | 3.96 x 10 <sup>-4</sup> | 1.46 x 10 <sup>-5</sup> –<br>2.10x10 <sup>-3</sup> | 0/0   | 0  | 1750 | TGTTTTCGGTTC<br>CTCTGTCC    | AGGGGAACAAC<br>ACACACTGG   | TD<br>70-50 | 28 | [29] |
| DYS596 | (GGA) <sub>5</sub> (GTA) <sub>1</sub> (GGA) <sub>3</sub> (GAA) <sub>3</sub><br>[(GGA) <sub>1</sub> (GAA) <sub>1</sub> ] <sub>8-10</sub>                                                                                                                                                                                                                                                                                                                                                                                                                                                                                              | 4.24 x 10 <sup>-4</sup> | 1.52 x 10 <sup>-5</sup> –<br>2.28x10 <sup>-3</sup> | 0/0   | 0  | 1630 | ATAACCGTGCCC<br>TTTACTGC    | TTTTGACAAGCC<br>CAAAGTTCT  | TD<br>60-50 | 44 | [29] |
| DYS611 | (TTC) <sub>5</sub> N <sub>9</sub> (TTC) <sub>4</sub> (CTC) <sub>1</sub> (TTC) <sub>3</sub> N <sub>9</sub><br>(TTC) <sub>5</sub> (CTC) <sub>1</sub> (TTC) <sub>3</sub> N <sub>15</sub> (TTC) <sub>4</sub><br>(CT) <sub>1</sub> (TTC) <sub>3</sub> (CTC) <sub>1</sub> (TTC) <sub>3</sub> N <sub>20</sub><br>(TTC) <sub>3</sub> T(TTC) <sub>4</sub> N <sub>7</sub> (TTC) <sub>3</sub> N <sub>9</sub><br>(TTC) <sub>4</sub> (TCC) <sub>1</sub> (TTC) <sub>7-21</sub> N <sub>23</sub><br>(TTC) <sub>4</sub> N <sub>4</sub><br>[(TTC) <sub>1</sub> (CTC) <sub>1</sub> ] <sub>2</sub> [(CTC) <sub>1</sub> (TTC) <sub>1</sub> ] <sub>3</sub> | 8.89 x 10 <sup>-3</sup> | 4.86 x 10 <sup>-3</sup> –<br>1.47x10 <sup>-2</sup> | 3/9   | 12 | 1426 | TACAGGTGTGCA<br>CCATGAGG    | CTTGGCAACATA<br>GCAGATCC   | TD<br>70-50 | 35 | [29] |
| DYS612 | (CCT) <sub>5</sub> (CTT) <sub>1</sub> (TCT) <sub>3</sub> (CCT) <sub>1</sub><br>(TCT) <sub>19-31</sub>                                                                                                                                                                                                                                                                                                                                                                                                                                                                                                                                | 1.45 x 10 <sup>-2</sup> | 9.61 x 10 <sup>-3</sup> –<br>2.09x10 <sup>-2</sup> | 11/14 | 25 | 1767 | CCCCATGCCAG<br>TAAGAATA     | TGAGGGAAGGC<br>AAAAGAAAA   | TD<br>60-50 | 42 | [29] |
| DYS613 | (ATG) <sub>8</sub> (ATA) <sub>1</sub> (ATG) <sub>8-9</sub>                                                                                                                                                                                                                                                                                                                                                                                                                                                                                                                                                                           | 4.35 x 10 <sup>-4</sup> | 1.60 x 10 <sup>-5</sup> –<br>2.32x10 <sup>-3</sup> | 0/0   | 0  | 1588 | ATAGAAGGCAA<br>ATTCCTTATCAA | AAAGTTAATGAC<br>GCCTTGTC   | TD<br>60-50 | 23 | [29] |
| DYS614 | (CTT) <sub>4</sub> (CCT) <sub>1</sub> (CTT) <sub>3</sub> N <sub>15</sub> (CCT) <sub>4</sub><br>(CTT) <sub>4</sub> (CCT) <sub>1</sub> (CTT) <sub>3</sub> N <sub>18</sub> (CCT) <sub>3</sub><br>(CTT) <sub>5</sub> N <sub>20</sub> [(CTT) <sub>1</sub> (CTG) <sub>1</sub> ] <sub>3</sub> (CT) <sub>1</sub><br>(CTT) <sub>12-22</sub> N <sub>8</sub> (CTT) <sub>4</sub><br>[(CTC) <sub>1</sub> (CTT) <sub>1</sub> ] <sub>3</sub><br>[(CTC) <sub>1</sub> (TTT) <sub>1</sub> ] <sub>1</sub> (CTT) <sub>5</sub>                                                                                                                            | 4.32 x 10 <sup>-3</sup> | 1.94 x 10 <sup>-3</sup> –<br>8.14x10 <sup>-3</sup> | 2/5   | 7  | 1776 | GTGGCGATGTTG<br>TGAGTGTT    | GCCACAAAAG<br>GTTTTCAGA    | TD<br>70-50 | 33 | [29] |
| DYS615 | (TTG) <sub>7-8</sub>                                                                                                                                                                                                                                                                                                                                                                                                                                                                                                                                                                                                                 | 3.91 x 10 <sup>-4</sup> | 1.43 x 10 <sup>-5</sup> –<br>2.09x10 <sup>-3</sup> | 0/0   | 0  | 1766 | GGTCGAAGAAG<br>GTGTCACAGA   | TGATTCTGCTAA<br>TTCCCATGC  | TD<br>70-50 | 25 | [29] |
| DYS616 | (TAT) <sub>8-16</sub> (CAT) <sub>1</sub> (TAT) <sub>3</sub>                                                                                                                                                                                                                                                                                                                                                                                                                                                                                                                                                                          | 1.72 x 10 <sup>-3</sup> | 4.03 x 10 <sup>-4</sup> –<br>4.64x10 <sup>-3</sup> | 1/1   | 2  | 1564 | GGCAAACAGAT<br>AGCAATTTACA  | TTGTTCTGCCCA<br>GCAGTAT    | TD<br>70-50 | 35 | [29] |
| DYS617 | (TTA) <sub>11-15</sub>                                                                                                                                                                                                                                                                                                                                                                                                                                                                                                                                                                                                               | 4.13 x 10 <sup>-4</sup> | 1.53 x 10 <sup>-5</sup> –<br>2.21x10 <sup>-3</sup> | 0/0   | 0  | 1684 | AGCATGTGCCCT<br>TCAGCTTT    | GGATTGGGGAG<br>TGATAGCAT   | TD<br>70-50 | 5  | [29] |
| DYS618 | (TAT) <sub>8-14</sub>                                                                                                                                                                                                                                                                                                                                                                                                                                                                                                                                                                                                                | 3.95 x 10 <sup>-4</sup> | 1.46 x 10 <sup>-5</sup> –<br>2.09x10 <sup>-3</sup> | 0/0   | 0  | 1766 | CCCATACCCTTG<br>GTGTTGTC    | GAGGGCTATGG<br>GAGGGATAG   | TD<br>70-50 | 13 | [29] |
| DYS619 | (AAT) <sub>6-10</sub>                                                                                                                                                                                                                                                                                                                                                                                                                                                                                                                                                                                                                | 4.69 x 10 <sup>-4</sup> | 1.70 x 10 <sup>-5</sup> –<br>2.50x10 <sup>-3</sup> | 0/0   | 0  | 1479 | GGCGACAGAGC<br>GAGACTCTA    | GGCATGTGAGTT<br>GAGGAACA   | TD<br>70-50 | 16 | [29] |
| DYS620 | (ATA) <sub>8-9</sub>                                                                                                                                                                                                                                                                                                                                                                                                                                                                                                                                                                                                                 | 4.11 x 10 <sup>-4</sup> | 1.47 x 10 <sup>-5</sup> –<br>2.22x10 <sup>-3</sup> | 0/0   | 0  | 1678 | TGACGAGTTAAT<br>GGGTGCAG    | TGAGTTTGCTCC<br>TCTAGCTTTC | TD<br>60-50 | 40 | [29] |
| DYS621 | (TTA) <sub>7-9</sub>                                                                                                                                                                                                                                                                                                                                                                                                                                                                                                                                                                                                                 | 4.44 x 10 <sup>-4</sup> | 1.70 x 10 <sup>-5</sup> –<br>2.38x10 <sup>-3</sup> | 0/0   | 0  | 1543 | GCCCAAATTA<br>AAGGCACAA     | TGACGAGTTAGT<br>GGGTGCAG   | TD<br>70-50 | 35 | [29] |
| DYS622 | (GAAA) <sub>6</sub> (AGAAG) <sub>1</sub> (GAAA) <sub>8-16</sub>                                                                                                                                                                                                                                                                                                                                                                                                                                                                                                                                                                      | 3.40 x 10 <sup>-3</sup> | 1.32 x 10 <sup>-3</sup> –<br>7.01x10 <sup>-3</sup> | 2/3   | 5  | 1663 | TCCAGCCTCGGT<br>GATAAGAG    | GGCTGAAGTGG<br>GTTGTGTTA   | TD<br>60-50 | 44 | [29] |
| DYS624 | (GGAT) <sub>8-10</sub><br>(G/AGAT) <sub>1</sub> N <sub>35</sub> (GGAT) <sub>3</sub>                                                                                                                                                                                                                                                                                                                                                                                                                                                                                                                                                  | 4.06 x 10 <sup>-4</sup> | 1.55 x 10 <sup>-5</sup> –<br>2.18x10 <sup>-3</sup> | 0/0   | 0  | 1699 | GCATCTCAAATC<br>CTTTGTGGA   | TCCACCTGCTTT<br>TCTCTCA    | TD<br>60-50 | 43 | [29] |
| DYS625 | (CTTT) <sub>4</sub> (TTCT) <sub>1</sub> (CTTT) <sub>3</sub> (TTT) <sub>1</sub><br>(CTTT) <sub>4</sub> (TT) <sub>1</sub> (CTTT) <sub>3</sub> N <sub>47</sub><br>(CTTT) <sub>3-5</sub> (CT) <sub>1</sub> (CTTT) <sub>4</sub> (CCTT) <sub>1</sub><br>(CTTT) <sub>3</sub> N <sub>10</sub> (CTTT) <sub>3</sub>                                                                                                                                                                                                                                                                                                                            | 9.58 x 10 <sup>-4</sup> | 1.40 x 10 <sup>-4</sup> –<br>3.18x10 <sup>-3</sup> | 0/1   | 1  | 1746 | TCATCACACATG<br>GCCTAATTG   | GGCAAGTCACAT<br>GCATTACAA  | TD<br>60-50 | 22 | [29] |
| DYS626 | (GAAA) <sub>14-23</sub> N <sub>24</sub> (GAAA) <sub>3</sub> N <sub>6</sub>                                                                                                                                                                                                                                                                                                                                                                                                                                                                                                                                                           | 1.22 x 10 <sup>-2</sup> | 7.70 x 10 <sup>-3</sup> –                          | 13/7  | 20 | 1689 | GCAAGACCCCA                 | AAGAAGAATTTT               | TD          | 23 | [29] |

|            |                                                                                                                                                      |                              |                                                        |             |           |             |                                               |                                           |                     |           |             |
|------------|------------------------------------------------------------------------------------------------------------------------------------------------------|------------------------------|--------------------------------------------------------|-------------|-----------|-------------|-----------------------------------------------|-------------------------------------------|---------------------|-----------|-------------|
|            | <b>(GAAA)<sub>5</sub>(AAA)<sub>1</sub>(GAAA)<sub>2-3</sub><br/>(GAAG)<sub>1</sub>(GAAA)<sub>3</sub></b>                                              |                              | <b>1.82x10<sup>-2</sup></b>                            |             |           |             | <b>TAGCAAAAG</b>                              | <b>GGGACATGTTT</b>                        | <b>60-50</b>        |           |             |
| DYS627     | <b>(AGAA)<sub>3</sub>N<sub>16</sub>(AGAG)<sub>3</sub><br/>(AAAG)<sub>12-24</sub>N<sub>81</sub>(AAGG)<sub>3</sub></b>                                 | <b>1.23 x10<sup>-2</sup></b> | <b>7.80 x10<sup>-3</sup>–<br/>1.81x10<sup>-2</sup></b> | <b>12/9</b> | <b>21</b> | <b>1766</b> | <b>CTAGGTGACAG<br/>CGCAGGATT</b>              | <b>GGATAATGAGC<br/>AAATGGCAAG</b>         | <b>TD<br/>60-50</b> | <b>21</b> | <b>[29]</b> |
| DYS629     | <b>(TATC)<sub>5-12</sub></b>                                                                                                                         | <b>9.91 x10<sup>-4</sup></b> | <b>1.41 x10<sup>-4</sup>–<br/>3.31x10<sup>-3</sup></b> | <b>1/0</b>  | <b>1</b>  | <b>1689</b> | <b>GGGATTATTACA<br/>ATTC AAGGTC</b>           | <b>TATGGGTA AATG<br/>GCAAAAGT</b>         | <b>TD<br/>60-50</b> | <b>19</b> | <b>[29]</b> |
| DYS630     | <b>(AAAG)<sub>4</sub>(AGAG)<sub>3</sub>N<sub>18</sub><br/>(AAAG)<sub>12-21</sub></b>                                                                 | <b>4.86 x10<sup>-3</sup></b> | <b>2.31 x10<sup>-3</sup>–<br/>8.85x10<sup>-3</sup></b> | <b>5/3</b>  | <b>8</b>  | <b>1784</b> | <b>GCCTTTGGACAG<br/>AGCAAGAC</b>              | <b>AGCCATGGAAA<br/>GCTGTGAGT</b>          | <b>TD<br/>70-50</b> | <b>25</b> | <b>[29]</b> |
| DYS631     | <b>(AATA)<sub>4</sub>(CATA)<sub>1</sub>(AATA)<sub>7-11</sub></b>                                                                                     | <b>9.77 x10<sup>-4</sup></b> | <b>1.40 x10<sup>-4</sup>–<br/>3.25x10<sup>-3</sup></b> | <b>0/1</b>  | <b>1</b>  | <b>1721</b> | <b>CACTCCAGCCTC<br/>GGAGATAG</b>              | <b>GCGCTCTGTGGA<br/>CATTATCA</b>          | <b>TD<br/>60-50</b> | <b>43</b> | <b>[29]</b> |
| DYS632     | <b>(CATT)<sub>8-10</sub></b>                                                                                                                         | <b>3.97 x10<sup>-4</sup></b> | <b>1.47 x10<sup>-5</sup>–<br/>2.13x10<sup>-3</sup></b> | <b>0/0</b>  | <b>0</b>  | <b>1745</b> | <b>GGCCGTTGCAA<br/>AATAAACTG</b>              | <b>TCTGGGCAACAG<br/>AAGGAGAC</b>          | <b>TD<br/>70-50</b> | <b>24</b> | <b>[29]</b> |
| DYS633     | <b>(AAAT)<sub>5</sub>N<sub>16</sub>(AAAT)<sub>7-9</sub></b>                                                                                          | <b>3.81 x10<sup>-4</sup></b> | <b>1.38 x10<sup>-5</sup>–<br/>2.02x10<sup>-3</sup></b> | <b>0/0</b>  | <b>0</b>  | <b>1814</b> | <b>GGCAACAAGAG<br/>CAAAACTCC</b>              | <b>CCACCAGGGAA<br/>GTGTCTTTC</b>          | <b>TD<br/>60-50</b> | <b>46</b> | <b>[29]</b> |
| DYS634     | <b>(GGAA)<sub>6</sub>N<sub>10</sub>(AAGG)<sub>7-10</sub><br/>N<sub>12</sub>(AGGG)<sub>3</sub></b>                                                    | <b>4.20 x10<sup>-4</sup></b> | <b>1.51 x10<sup>-5</sup>–<br/>2.25x10<sup>-3</sup></b> | <b>0/0</b>  | <b>0</b>  | <b>1646</b> | <b>TCAGAAGCATG<br/>CTAGAACCCTA</b>            | <b>TTGCTCCTTACA<br/>GAAGAGGTGA</b>        | <b>TD<br/>60-50</b> | <b>19</b> | <b>[29]</b> |
| DYS635     | <b>(TCTA)<sub>4</sub>(TGTA)<sub>2</sub>(TCTA)<sub>2</sub><br/>(TGTA)<sub>2</sub>(TCTA)<sub>2</sub>(TATG)<sub>0-2</sub><br/>(TCTA)<sub>4-17</sub></b> | <b>3.85 x10<sup>-3</sup></b> | <b>1.63 x10<sup>-3</sup>–<br/>7.55x10<sup>-3</sup></b> | <b>1/5</b>  | <b>6</b>  | <b>1732</b> | Yfiler                                        | Yfiler                                    | Yfiler              | Yfiler    | [29]        |
| DYS637     | <b>(AAAT)<sub>4</sub>(ACAT)<sub>8-14</sub></b>                                                                                                       | <b>1.04 x10<sup>-3</sup></b> | <b>1.53 x10<sup>-4</sup>–<br/>3.42x10<sup>-3</sup></b> | <b>0/1</b>  | <b>1</b>  | <b>1623</b> | <b>AAGCCAGTCAA<br/>CCAAACACA</b>              | <b>TGCTGGGGTTGA<br/>AGGTAAAA</b>          | <b>TD<br/>60-50</b> | <b>41</b> | <b>[29]</b> |
| DYS638     | <b>(TTTA)<sub>8-13</sub></b>                                                                                                                         | <b>1.04 x10<sup>-3</sup></b> | <b>1.47 x10<sup>-4</sup>–<br/>3.45x10<sup>-3</sup></b> | <b>1/0</b>  | <b>1</b>  | <b>1617</b> | <b>ACAATTTCCCTT<br/>GGGGCTAC</b>              | <b>CATGGTGGTAGG<br/>CACCTGTA</b>          | <b>TD<br/>70-50</b> | <b>6</b>  | <b>[29]</b> |
| DYS640     | <b>(AAAT)<sub>9-13</sub></b>                                                                                                                         | <b>3.98 x10<sup>-4</sup></b> | <b>1.41 x10<sup>-5</sup>–<br/>2.16x10<sup>-3</sup></b> | <b>0/0</b>  | <b>0</b>  | <b>1716</b> | <b>TGGGAAAAACC<br/>ATGAGATCC</b>              | <b>TAGGGTCAAGCC<br/>CGTTCATA</b>          | <b>TD<br/>70-50</b> | <b>15</b> | <b>[29]</b> |
| DYS641     | <b>(TAAA)<sub>8-12</sub></b>                                                                                                                         | <b>3.90 x10<sup>-4</sup></b> | <b>1.41 x10<sup>-5</sup>–<br/>2.09x10<sup>-3</sup></b> | <b>0/0</b>  | <b>0</b>  | <b>1768</b> | <b>CTTGAGCCCAGG<br/>AAGCATAG</b>              | <b>CCACACGATGCA<br/>ATTTTGTC</b>          | <b>TD<br/>70-50</b> | <b>6</b>  | <b>[29]</b> |
| DYS642     | <b>(TAAA)<sub>6-10</sub></b>                                                                                                                         | <b>3.91 x10<sup>-4</sup></b> | <b>1.45 x10<sup>-5</sup>–<br/>2.07x10<sup>-3</sup></b> | <b>0/0</b>  | <b>0</b>  | <b>1785</b> | <b>CATTGTGCACGT<br/>GTACCCTAA</b>             | <b>AAAGGTTGTGC<br/>TGCATGAT</b>           | <b>TD<br/>70-50</b> | <b>33</b> | <b>[29]</b> |
| DYS643     | <b>(CTTTT)<sub>6-15</sub></b>                                                                                                                        | <b>1.50 x10<sup>-3</sup></b> | <b>3.49 x10<sup>-4</sup>–<br/>4.05x10<sup>-3</sup></b> | <b>2/0</b>  | <b>2</b>  | <b>1773</b> | <b>AAGCCATGCCTG<br/>GTTAAACT</b>              | <b>TGTAACCAAAACA<br/>CCACCCATT</b>        | <b>TD<br/>70-50</b> | <b>14</b> | <b>[29]</b> |
| DYS644     | <b>(TTTTA)<sub>10-11</sub>(TTTA)<sub>0-1</sub><br/>(TTTTA)<sub>0-13</sub></b>                                                                        | <b>3.22 x10<sup>-3</sup></b> | <b>1.25 x10<sup>-3</sup>–<br/>6.62x10<sup>-3</sup></b> | <b>3/2</b>  | <b>5</b>  | <b>1761</b> | <b>TGACTTCGGGGT<br/>AGTTCCAG</b>              | <b>CCTGGGCAAAA<br/>GAGTGAGAC</b>          | <b>TD<br/>70-50</b> | <b>8</b>  | <b>[29]</b> |
| DYS645     | <b>(TGTTT)<sub>7-9</sub></b>                                                                                                                         | <b>4.07 x10<sup>-4</sup></b> | <b>1.49 x10<sup>-5</sup>–<br/>2.14x10<sup>-3</sup></b> | <b>0/0</b>  | <b>0</b>  | <b>1698</b> | <b>GGTTACGGGTG<br/>GCAATCATA</b>              | <b>ACTGCCAGACTC<br/>ACACATGG</b>          | <b>TD<br/>60-50</b> | <b>40</b> | <b>[29]</b> |
| Y-GATA-A10 | <b>(ATCT)<sub>11-16</sub></b>                                                                                                                        | <b>3.32 x10<sup>-3</sup></b> | <b>1.25 x10<sup>-3</sup>–<br/>6.80x10<sup>-3</sup></b> | <b>3/2</b>  | <b>5</b>  | <b>1713</b> | <b>CCTGCCATCTCT<br/>ATTTATCTTGCA<br/>TATA</b> | <b>ATAAATGGAGA<br/>TAGTGGGTGGAT<br/>T</b> | <b>TD<br/>60-50</b> | <b>41</b> | <b>[29]</b> |
| Y-GATA-H4  | <b>(TAGA)<sub>3</sub>N<sub>12</sub>(TAGG)<sub>3</sub>(TAGA)<sub>8-15</sub><br/>N<sub>22</sub>(TAGA)<sub>4</sub></b>                                  | <b>3.22 x10<sup>-3</sup></b> | <b>1.28 x10<sup>-3</sup>–<br/>6.62x10<sup>-3</sup></b> | <b>1/4</b>  | <b>5</b>  | <b>1755</b> | Yfiler                                        | Yfiler                                    | Yfiler              | Yfiler    | [29]        |

Markers with median mutation rates above 10<sup>-2</sup> (the RM Y-STR set) are highlighted in red. Additionally included are PCR primers, PCR annealing temperature and locus assignment to the 54 multiplexes used for genotyping.

Notes: The repeat nomenclature used is in accordance with rules defined by Kayser *et al.* (2004). Separation of repeat blocks by "N" represents the break point between the separate loci present within complex markers (as described in Methods and Materials). Repeat arrays observed to be variable through sequence analysis are highlighted in bold. The allele ranges given are those seen with the 1966 father-son pairs of European origin.

The "Total number of Meioses" reported is the number of meioses for the marker, and is not the number of allele transmissions for multicopy markers.

The mutations reported for the Yfiler loci have been previously reported in Reference 28.

PCR Protocols:

| TD60-50 |         |     | TD65-50 |         |     | TD65-55 |         |     | TD70-50 |         |     |
|---------|---------|-----|---------|---------|-----|---------|---------|-----|---------|---------|-----|
| 95C     | 10 min  |     | 95C     | 15 min  |     | 95C     | 10 min  |     | 95C     | 15 min  |     |
| 94C     | 30s     | X10 | 94C     | 30s     | X20 | 94C     | 30s     | X10 | 94C     | 30s     | X20 |
| 60-1C   | 30s     |     | 65-1C   | 45s     |     | 65-1C   | 30s     |     | 70-1C   | 45s     |     |
| 72C     | 45s     |     | 72C     | 1 min   |     | 72C     | 45s     |     | 72C     | 1 min   |     |
| 94C     | 30s     | X25 | 94C     | 30s     | X15 | 94C     | 30s     | X25 | 94C     | 30s     | X15 |
| 50C     | 30s     |     | 50C     | 30s     |     | 55C     | 30s     |     | 50C     | 30s     |     |
| 72C     | 45s     |     | 72C     | 45s     |     | 72C     | 45s     |     | 72C     | 45s     |     |
| 60C     | 45min   |     | 60C     | 45min   |     | 60C     | 45min   |     | 60C     | 45min   |     |
| 15C     | forever |     | 15C     | forever |     | 15C     | forever |     | 15C     | forever |     |

PCR Protocols for Extra Genotyping of RM Y-STRs:

| RM 1<br>(DYF387S1, DYF399S1, DYS570, DYS576) |         | RM 2<br>(DYS518, DYS526a/b, DYS626, DYS627) |         | RM 3<br>(DYF403S1a/b, DYF404S1, DYS449, DYS547, DYS612) |         |
|----------------------------------------------|---------|---------------------------------------------|---------|---------------------------------------------------------|---------|
| PCR Buffer                                   | 1x      | PCR Buffer                                  | 1x      | PCR Buffer                                              | 1x      |
| MgCl <sub>2</sub>                            | 2.27mM  | MgCl <sub>2</sub>                           | 1.5mM   | MgCl <sub>2</sub>                                       | 2.0mM   |
| dNTPs                                        | 220µM   | dNTPs                                       | 250µM   | dNTPs                                                   | 250µM   |
| DYF387S1 Primer                              | 0.09µM  | DYS518 Primer                               | 0.5µM   | DYF403S1a/b Primer                                      | 0.6µM   |
| DYF399S1 Primer                              | 0.36µM  | DYS526a/b Primer                            | 0.35µM  | DYSF404S1 Primer                                        | 0.1µM   |
| DYS570 Primer                                | 0.09µM  | DYS626 Primer                               | 0.2µM   | DYS449 Primer                                           | 0.1µM   |
| DYS576 Primer                                | 0.09µM  | DYS627Primer                                | 0.15µM  | DYS547 Primer                                           | 0.6µM   |
|                                              |         |                                             |         | DYS612 Primer                                           | 0.2µM   |
| Taq                                          | 0.25U   | Taq                                         | 0.35U   | Taq                                                     | 0.5U    |
| DNA                                          | 2ng     | DNA                                         | 2ng     | DNA                                                     | 2ng     |
| PCR Protocol                                 | TD70-50 | PCR Protocol                                | TD65-55 | PCR Protocol                                            | TD65-55 |

**Table S2. Details of the 924 Y-STR Mutations Observed among DNA-Confirmed Father-Son Pairs (See Footnote for Explanation)**

| Locus    | Father Allele                                                                                   | Son Allele                                                                                      | Father's Age | Father Reference # |
|----------|-------------------------------------------------------------------------------------------------|-------------------------------------------------------------------------------------------------|--------------|--------------------|
| DYF382S1 | (GGAT) <sub>13</sub> (AGAT) <sub>1</sub> (GGAT) <sub>3</sub> N <sub>8</sub> (GGAC) <sub>3</sub> | (GGAT) <sub>14</sub> (AGAT) <sub>1</sub> (GGAT) <sub>3</sub> N <sub>8</sub> (GGAC) <sub>3</sub> | 59           | 1953               |
| DYF386S1 | (AAT) <sub>12</sub>                                                                             | (AAT) <sub>13</sub>                                                                             | 27           | 20                 |
| DYF386S1 | (AAT) <sub>14</sub>                                                                             | (AAT) <sub>13</sub>                                                                             | 32           | 84                 |
| DYF386S1 | (AAT) <sub>13</sub>                                                                             | (AAT) <sub>12</sub>                                                                             | 38           | 94                 |
| DYF386S1 | (AAT) <sub>15</sub>                                                                             | (AAT) <sub>13</sub>                                                                             | 20           | 208                |
| DYF386S1 | (AAT) <sub>14</sub>                                                                             | (AAT) <sub>13</sub>                                                                             | 25           | 317                |
| DYF386S1 | (AAT) <sub>11</sub>                                                                             | (AAT) <sub>12</sub>                                                                             | 19           | 641                |
| DYF386S1 | (AAT) <sub>14</sub>                                                                             | (AAT) <sub>13</sub>                                                                             | 27           | 1195               |
| DYF386S1 | (AAT) <sub>14</sub>                                                                             | (AAT) <sub>15</sub>                                                                             | 40           | 1558               |
| DYF386S1 | (AAT) <sub>14</sub>                                                                             | (AAT) <sub>13</sub>                                                                             | 42           | 1644               |
| DYF386S1 | (AAT) <sub>14</sub>                                                                             | (AAT) <sub>13</sub>                                                                             | 52           | 1864               |
| DYF387S1 | 21                                                                                              | 24                                                                                              | 21           | 46                 |
| DYF387S1 | 23                                                                                              | 22                                                                                              | 48           | 74                 |
| DYF387S1 | 23                                                                                              | 24                                                                                              | 36           | 150                |
| DYF387S1 | 20                                                                                              | 21                                                                                              | 29           | 155                |
| DYF387S1 | 24                                                                                              | 23                                                                                              | 24           | 259                |
| DYF387S1 | 22                                                                                              | 21                                                                                              | 28           | 677                |
| DYF387S1 | 24                                                                                              | 23                                                                                              | 40           | 738                |
| DYF387S1 | 25                                                                                              | 24                                                                                              | 22           | 817                |
| DYF387S1 | 25                                                                                              | 26                                                                                              | 36           | 830                |
| DYF387S1 | 25                                                                                              | 26                                                                                              | 18           | 852                |
| DYF387S1 | 23                                                                                              | 24                                                                                              | 28           | 880                |
| DYF387S1 | 24                                                                                              | 23                                                                                              | 19           | 916                |
| DYF387S1 | 21                                                                                              | 22                                                                                              | 33           | 955                |
| DYF387S1 | 22                                                                                              | 23                                                                                              | 43           | 1159               |
| DYF387S1 | 23                                                                                              | 24                                                                                              | Unknown      | 1202               |

|          |                                                                                                                                                                                                |                                                                                                                                                                                                |         |      |
|----------|------------------------------------------------------------------------------------------------------------------------------------------------------------------------------------------------|------------------------------------------------------------------------------------------------------------------------------------------------------------------------------------------------|---------|------|
| DYF387S1 | 24                                                                                                                                                                                             | 23                                                                                                                                                                                             | 30      | 1274 |
| DYF387S1 | 23                                                                                                                                                                                             | 22                                                                                                                                                                                             | 37      | 1319 |
| DYF387S1 | 23                                                                                                                                                                                             | 21                                                                                                                                                                                             | Unknown | 1328 |
| DYF387S1 | 24                                                                                                                                                                                             | 25                                                                                                                                                                                             | 31      | 1390 |
| DYF387S1 | 23                                                                                                                                                                                             | 24                                                                                                                                                                                             | 39      | 1451 |
| DYF387S1 | 22                                                                                                                                                                                             | 21                                                                                                                                                                                             | 24      | 1469 |
| DYF387S1 | 22                                                                                                                                                                                             | 23                                                                                                                                                                                             | 38      | 1494 |
| DYF387S1 | 21                                                                                                                                                                                             | 22                                                                                                                                                                                             | 39      | 1552 |
| DYF387S1 | 21                                                                                                                                                                                             | 22                                                                                                                                                                                             | 20      | 1592 |
| DYF387S1 | 23                                                                                                                                                                                             | 22                                                                                                                                                                                             | 42      | 1644 |
| DYF387S1 | 23                                                                                                                                                                                             | 22                                                                                                                                                                                             | 23      | 1710 |
| DYF387S1 | 23                                                                                                                                                                                             | 22                                                                                                                                                                                             | 18      | 1750 |
| DYF387S1 | 23                                                                                                                                                                                             | 25                                                                                                                                                                                             | 54      | 1911 |
| DYF388S1 | (CTTC) <sub>6</sub> (CTTT) <sub>12</sub> N <sub>18</sub> (CTTC) <sub>3</sub> (TTTC) <sub>1</sub><br>(CTTC) <sub>3</sub> N <sub>8</sub> (CTTC) <sub>3</sub> N <sub>32</sub> (CTTC) <sub>3</sub> | (CTTC) <sub>6</sub> (CTTT) <sub>13</sub> N <sub>18</sub> (CTTC) <sub>3</sub> (TTTC) <sub>1</sub><br>(CTTC) <sub>3</sub> N <sub>8</sub> (CTTC) <sub>3</sub> N <sub>32</sub> (CTTC) <sub>3</sub> | 37      | 36   |
| DYF388S1 | (CTTC) <sub>6</sub> (CTTT) <sub>14</sub> N <sub>18</sub> (CTTC) <sub>3</sub> (TTTC) <sub>1</sub><br>(CTTC) <sub>3</sub> N <sub>8</sub> (CTTC) <sub>3</sub> N <sub>32</sub> (CTTC) <sub>3</sub> | (CTTC) <sub>6</sub> (CTTT) <sub>12</sub> N <sub>18</sub> (CTTC) <sub>3</sub> (TTTC) <sub>1</sub><br>(CTTC) <sub>3</sub> N <sub>8</sub> (CTTC) <sub>3</sub> N <sub>32</sub> (CTTC) <sub>3</sub> | 34      | 372  |
| DYF388S1 | (CTTC) <sub>6</sub> (CTTT) <sub>12</sub> N <sub>18</sub> (CTTC) <sub>3</sub> (TTTC) <sub>1</sub><br>(CTTC) <sub>3</sub> N <sub>8</sub> (CTTC) <sub>3</sub> N <sub>32</sub> (CTTC) <sub>3</sub> | (CTTC) <sub>6</sub> (CTTT) <sub>13</sub> N <sub>18</sub> (CTTC) <sub>3</sub> (TTTC) <sub>1</sub><br>(CTTC) <sub>3</sub> N <sub>8</sub> (CTTC) <sub>3</sub> N <sub>32</sub> (CTTC) <sub>3</sub> | 28      | 674  |
| DYF388S1 | (CTTC) <sub>6</sub> (CTTT) <sub>12</sub> N <sub>18</sub> (CTTC) <sub>3</sub> (TTTC) <sub>1</sub><br>(CTTC) <sub>3</sub> N <sub>8</sub> (CTTC) <sub>3</sub> N <sub>32</sub> (CTTC) <sub>3</sub> | (CTTC) <sub>6</sub> (CTTT) <sub>13</sub> N <sub>18</sub> (CTTC) <sub>3</sub> (TTTC) <sub>1</sub><br>(CTTC) <sub>3</sub> N <sub>8</sub> (CTTC) <sub>3</sub> N <sub>32</sub> (CTTC) <sub>3</sub> | 21      | 769  |
| DYF388S1 | (CTTC) <sub>6</sub> (CTTT) <sub>11</sub> N <sub>18</sub> (CTTC) <sub>3</sub> (TTTC) <sub>1</sub><br>(CTTC) <sub>3</sub> N <sub>8</sub> (CTTC) <sub>3</sub> N <sub>32</sub> (CTTC) <sub>3</sub> | (CTTC) <sub>6</sub> (CTTT) <sub>12</sub> N <sub>18</sub> (CTTC) <sub>3</sub> (TTTC) <sub>1</sub><br>(CTTC) <sub>3</sub> N <sub>8</sub> (CTTC) <sub>3</sub> N <sub>32</sub> (CTTC) <sub>3</sub> | 49      | 945  |
| DYF388S1 | (CTTC) <sub>6</sub> (CTTT) <sub>12</sub> N <sub>18</sub> (CTTC) <sub>3</sub> (TTTC) <sub>1</sub><br>(CTTC) <sub>3</sub> N <sub>8</sub> (CTTC) <sub>3</sub> N <sub>32</sub> (CTTC) <sub>3</sub> | (CTTC) <sub>6</sub> (CTTT) <sub>11</sub> N <sub>18</sub> (CTTC) <sub>3</sub> (TTTC) <sub>1</sub><br>(CTTC) <sub>3</sub> N <sub>8</sub> (CTTC) <sub>3</sub> N <sub>32</sub> (CTTC) <sub>3</sub> | 28      | 1035 |
| DYF388S1 | (CTTC) <sub>6</sub> (CTTT) <sub>12</sub> N <sub>18</sub> (CTTC) <sub>3</sub> (TTTC) <sub>1</sub><br>(CTTC) <sub>3</sub> N <sub>8</sub> (CTTC) <sub>3</sub> N <sub>32</sub> (CTTC) <sub>3</sub> | (CTTC) <sub>6</sub> (CTTT) <sub>13</sub> N <sub>18</sub> (CTTC) <sub>3</sub> (TTTC) <sub>1</sub><br>(CTTC) <sub>3</sub> N <sub>8</sub> (CTTC) <sub>3</sub> N <sub>32</sub> (CTTC) <sub>3</sub> | 30      | 1177 |
| DYF388S1 | (CTTC) <sub>6</sub> (CTTT) <sub>13</sub> N <sub>18</sub> (CTTC) <sub>3</sub> (TTTC) <sub>1</sub><br>(CTTC) <sub>3</sub> N <sub>8</sub> (CTTC) <sub>3</sub> N <sub>32</sub> (CTTC) <sub>3</sub> | (CTTC) <sub>6</sub> (CTTT) <sub>12</sub> N <sub>18</sub> (CTTC) <sub>3</sub> (TTTC) <sub>1</sub><br>(CTTC) <sub>3</sub> N <sub>8</sub> (CTTC) <sub>3</sub> N <sub>32</sub> (CTTC) <sub>3</sub> | 56      | 1272 |
| DYF388S1 | (CTTC) <sub>6</sub> (CTTT) <sub>13</sub> N <sub>18</sub> (CTTC) <sub>3</sub> (TTTC) <sub>1</sub><br>(CTTC) <sub>3</sub> N <sub>8</sub> (CTTC) <sub>3</sub> N <sub>32</sub> (CTTC) <sub>3</sub> | (CTTC) <sub>6</sub> (CTTT) <sub>12</sub> N <sub>18</sub> (CTTC) <sub>3</sub> (TTTC) <sub>1</sub><br>(CTTC) <sub>3</sub> N <sub>8</sub> (CTTC) <sub>3</sub> N <sub>32</sub> (CTTC) <sub>3</sub> | Unknown | 1352 |
| DYF388S1 | (CTTC) <sub>6</sub> (CTTT) <sub>13</sub> N <sub>18</sub> (CTTC) <sub>3</sub> (TTTC) <sub>1</sub><br>(CTTC) <sub>3</sub> N <sub>8</sub> (CTTC) <sub>3</sub> N <sub>32</sub> (CTTC) <sub>3</sub> | (CTTC) <sub>6</sub> (CTTT) <sub>12</sub> N <sub>18</sub> (CTTC) <sub>3</sub> (TTTC) <sub>1</sub><br>(CTTC) <sub>3</sub> N <sub>8</sub> (CTTC) <sub>3</sub> N <sub>32</sub> (CTTC) <sub>3</sub> | 31      | 1518 |
| DYF388S1 | (CTTC) <sub>6</sub> (CTTT) <sub>14</sub> N <sub>18</sub> (CTTC) <sub>3</sub> (TTTC) <sub>1</sub><br>(CTTC) <sub>3</sub> N <sub>8</sub> (CTTC) <sub>3</sub> N <sub>32</sub> (CTTC) <sub>3</sub> | (CTTC) <sub>6</sub> (CTTT) <sub>12</sub> N <sub>18</sub> (CTTC) <sub>3</sub> (TTTC) <sub>1</sub><br>(CTTC) <sub>3</sub> N <sub>8</sub> (CTTC) <sub>3</sub> N <sub>32</sub> (CTTC) <sub>3</sub> | 28      | 1734 |

|          |                                                                             |                                                                             |    |      |
|----------|-----------------------------------------------------------------------------|-----------------------------------------------------------------------------|----|------|
| DYF390S1 | (TTTA) <sub>11</sub>                                                        | (TTTA) <sub>10</sub>                                                        | 21 | 1667 |
| DYF393S1 | (AAG) <sub>4</sub> (AA) <sub>1</sub> (AAG) <sub>26</sub> (CAG) <sub>1</sub> | (AAG) <sub>4</sub> (AA) <sub>1</sub> (AAG) <sub>25</sub> (CAG) <sub>1</sub> | 32 | 19   |
| DYF393S1 | (AAG) <sub>4</sub> (AA) <sub>1</sub> (AAG) <sub>28</sub> (CAG) <sub>1</sub> | (AAG) <sub>4</sub> (AA) <sub>1</sub> (AAG) <sub>29</sub> (CAG) <sub>1</sub> | 32 | 84   |
| DYF393S1 | (AAG) <sub>4</sub> (AA) <sub>1</sub> (AAG) <sub>19</sub> (CAG) <sub>1</sub> | (AAG) <sub>4</sub> (AA) <sub>1</sub> (AAG) <sub>20</sub> (CAG) <sub>1</sub> | 34 | 183  |
| DYF393S1 | (AAG) <sub>4</sub> (AA) <sub>1</sub> (AAG) <sub>26</sub> (CAG) <sub>1</sub> | (AAG) <sub>4</sub> (AA) <sub>1</sub> (AAG) <sub>25</sub> (CAG) <sub>1</sub> | 32 | 213  |
| DYF393S1 | (AAG) <sub>4</sub> (AA) <sub>1</sub> (AAG) <sub>25</sub> (CAG) <sub>1</sub> | (AAG) <sub>4</sub> (AA) <sub>1</sub> (AAG) <sub>24</sub> (CAG) <sub>1</sub> | 26 | 303  |
| DYF393S1 | (AAG) <sub>4</sub> (AA) <sub>1</sub> (AAG) <sub>22</sub> (CAG) <sub>1</sub> | (AAG) <sub>4</sub> (AA) <sub>1</sub> (AAG) <sub>23</sub> (CAG) <sub>1</sub> | 31 | 927  |
| DYF393S1 | (AAG) <sub>4</sub> (AA) <sub>1</sub> (AAG) <sub>26</sub> (CAG) <sub>2</sub> | (AAG) <sub>4</sub> (AA) <sub>1</sub> (AAG) <sub>27</sub> (CAG) <sub>2</sub> | 23 | 941  |
| DYF393S1 | (AAG) <sub>4</sub> (AA) <sub>1</sub> (AAG) <sub>22</sub> (CAG) <sub>1</sub> | (AAG) <sub>4</sub> (AA) <sub>1</sub> (AAG) <sub>23</sub> (CAG) <sub>1</sub> | 64 | 951  |
| DYF393S1 | (AAG) <sub>4</sub> (AA) <sub>1</sub> (AAG) <sub>27</sub> (CAG) <sub>1</sub> | (AAG) <sub>4</sub> (AA) <sub>1</sub> (AAG) <sub>26</sub> (CAG) <sub>1</sub> | 21 | 1207 |
| DYF393S1 | (AAG) <sub>4</sub> (AA) <sub>1</sub> (AAG) <sub>22</sub> (CAG) <sub>1</sub> | (AAG) <sub>4</sub> (AA) <sub>1</sub> (AAG) <sub>24</sub> (CAG) <sub>1</sub> | 17 | 1406 |
| DYF393S1 | (AAG) <sub>4</sub> (AA) <sub>1</sub> (AAG) <sub>28</sub> (CAG) <sub>1</sub> | (AAG) <sub>4</sub> (AA) <sub>1</sub> (AAG) <sub>29</sub> (CAG) <sub>1</sub> | 19 | 1530 |
| DYF393S1 | (AAG) <sub>4</sub> (AA) <sub>1</sub> (AAG) <sub>27</sub> (CAG) <sub>1</sub> | (AAG) <sub>4</sub> (AA) <sub>1</sub> (AAG) <sub>28</sub> (CAG) <sub>1</sub> | 26 | 1551 |
| DYF393S1 | (AAG) <sub>4</sub> (AA) <sub>1</sub> (AAG) <sub>23</sub> (CAG) <sub>1</sub> | (AAG) <sub>4</sub> (AA) <sub>1</sub> (AAG) <sub>24</sub> (CAG) <sub>1</sub> | 36 | 1672 |
| DYF393S1 | (AAG) <sub>4</sub> (AA) <sub>1</sub> (AAG) <sub>25</sub> (CAG) <sub>1</sub> | (AAG) <sub>4</sub> (AA) <sub>1</sub> (AAG) <sub>24</sub> (CAG) <sub>1</sub> | 55 | 1928 |
| DYF399S1 | (GAAA) <sub>3</sub> N <sub>8</sub> (GAAA) <sub>19</sub>                     | (GAAA) <sub>3</sub> N <sub>8</sub> (GAAA) <sub>20</sub>                     | 22 | 14   |
| DYF399S1 | (GAAA) <sub>3</sub> N <sub>8</sub> (GAAA) <sub>16</sub>                     | (GAAA) <sub>3</sub> N <sub>8</sub> (GAAA) <sub>17</sub>                     | 46 | 21   |
| DYF399S1 | (GAAA) <sub>3</sub> N <sub>8</sub> (GAAA) <sub>19</sub>                     | (GAAA) <sub>3</sub> N <sub>8</sub> (GAAA) <sub>20</sub>                     | 36 | 22   |
| DYF399S1 | (GAAA) <sub>3</sub> N <sub>7</sub> (GAAA) <sub>18</sub>                     | (GAAA) <sub>3</sub> N <sub>8</sub> (GAAA) <sub>19</sub>                     | 30 | 25   |
| DYF399S1 | (GAAA) <sub>3</sub> N <sub>7</sub> (GAAA) <sub>21</sub>                     | (GAAA) <sub>3</sub> N <sub>8</sub> (GAAA) <sub>20</sub>                     | 32 | 32   |
| DYF399S1 | (GAAA) <sub>3</sub> N <sub>8</sub> (GAAA) <sub>20</sub>                     | (GAAA) <sub>3</sub> N <sub>8</sub> (GAAA) <sub>19</sub>                     | 16 | 55   |
| DYF399S1 | (GAAA) <sub>3</sub> N <sub>7</sub> (GAAA) <sub>18</sub>                     | (GAAA) <sub>3</sub> N <sub>8</sub> (GAAA) <sub>19</sub>                     | 32 | 59   |
| DYF399S1 | (GAAA) <sub>3</sub> N <sub>8</sub> (GAAA) <sub>20</sub>                     | (GAAA) <sub>3</sub> N <sub>8</sub> (GAAA) <sub>19</sub>                     | 30 | 62   |
| DYF399S1 | (GAAA) <sub>3</sub> N <sub>8</sub> (GAAA) <sub>19</sub>                     | (GAAA) <sub>3</sub> N <sub>7</sub> (GAAA) <sub>18</sub>                     | 46 | 72   |
| DYF399S1 | (GAAA) <sub>3</sub> N <sub>7</sub> (GAAA) <sub>18</sub>                     | (GAAA) <sub>3</sub> N <sub>8</sub> (GAAA) <sub>19</sub>                     | 46 | 72   |
| DYF399S1 | (GAAA) <sub>3</sub> N <sub>8</sub> (GAAA) <sub>19</sub>                     | (GAAA) <sub>3</sub> N <sub>8</sub> (GAAA) <sub>20</sub>                     | 25 | 79   |
| DYF399S1 | (GAAA) <sub>3</sub> N <sub>8</sub> (GAAA) <sub>19</sub>                     | (GAAA) <sub>3</sub> N <sub>8</sub> (GAAA) <sub>20</sub>                     | 25 | 80   |

|          |                                                         |                                                         |    |     |
|----------|---------------------------------------------------------|---------------------------------------------------------|----|-----|
| DYF399S1 | (GAAA) <sub>3</sub> N <sub>8</sub> (GAAA) <sub>20</sub> | (GAAA) <sub>3</sub> N <sub>8</sub> (GAAA) <sub>19</sub> | 28 | 91  |
| DYF399S1 | (GAAA) <sub>3</sub> N <sub>7</sub> (GAAA) <sub>21</sub> | (GAAA) <sub>3</sub> N <sub>8</sub> (GAAA) <sub>20</sub> | 32 | 95  |
| DYF399S1 | (GAAA) <sub>3</sub> N <sub>8</sub> (GAAA) <sub>17</sub> | (GAAA) <sub>3</sub> N <sub>8</sub> (GAAA) <sub>16</sub> | 30 | 99  |
| DYF399S1 | (GAAA) <sub>3</sub> N <sub>8</sub> (GAAA) <sub>20</sub> | (GAAA) <sub>3</sub> N <sub>8</sub> (GAAA) <sub>19</sub> | 27 | 119 |
| DYF399S1 | (GAAA) <sub>3</sub> N <sub>8</sub> (GAAA) <sub>19</sub> | (GAAA) <sub>3</sub> N <sub>8</sub> (GAAA) <sub>20</sub> | 48 | 122 |
| DYF399S1 | (GAAA) <sub>3</sub> N <sub>8</sub> (GAAA) <sub>19</sub> | (GAAA) <sub>3</sub> N <sub>7</sub> (GAAA) <sub>18</sub> | 33 | 126 |
| DYF399S1 | (GAAA) <sub>3</sub> N <sub>8</sub> (GAAA) <sub>17</sub> | (GAAA) <sub>3</sub> N <sub>8</sub> (GAAA) <sub>16</sub> | 36 | 136 |
| DYF399S1 | (GAAA) <sub>3</sub> N <sub>8</sub> (GAAA) <sub>19</sub> | (GAAA) <sub>3</sub> N <sub>8</sub> (GAAA) <sub>20</sub> | 28 | 153 |
| DYF399S1 | (GAAA) <sub>3</sub> N <sub>7</sub> (GAAA) <sub>18</sub> | (GAAA) <sub>3</sub> N <sub>8</sub> (GAAA) <sub>17</sub> | 33 | 189 |
| DYF399S1 | (GAAA) <sub>3</sub> N <sub>8</sub> (GAAA) <sub>17</sub> | (GAAA) <sub>3</sub> N <sub>7</sub> (GAAA) <sub>18</sub> | 39 | 200 |
| DYF399S1 | (GAAA) <sub>3</sub> N <sub>8</sub> (GAAA) <sub>16</sub> | (GAAA) <sub>3</sub> N <sub>8</sub> (GAAA) <sub>15</sub> | 22 | 203 |
| DYF399S1 | (GAAA) <sub>3</sub> N <sub>8</sub> (GAAA) <sub>19</sub> | (GAAA) <sub>3</sub> N <sub>7</sub> (GAAA) <sub>18</sub> | 22 | 229 |
| DYF399S1 | (GAAA) <sub>3</sub> N <sub>8</sub> (GAAA) <sub>16</sub> | (GAAA) <sub>3</sub> N <sub>8</sub> (GAAA) <sub>15</sub> | 50 | 270 |
| DYF399S1 | (GAAA) <sub>3</sub> N <sub>8</sub> (GAAA) <sub>19</sub> | (GAAA) <sub>3</sub> N <sub>8</sub> (GAAA) <sub>20</sub> | 28 | 287 |
| DYF399S1 | (GAAA) <sub>3</sub> N <sub>7</sub> (GAAA) <sub>21</sub> | (GAAA) <sub>3</sub> N <sub>8</sub> (GAAA) <sub>20</sub> | 32 | 290 |
| DYF399S1 | (GAAA) <sub>3</sub> N <sub>8</sub> (GAAA) <sub>16</sub> | (GAAA) <sub>3</sub> N <sub>8</sub> (GAAA) <sub>17</sub> | 21 | 299 |
| DYF399S1 | (GAAA) <sub>3</sub> N <sub>8</sub> (GAAA) <sub>22</sub> | (GAAA) <sub>3</sub> N <sub>7</sub> (GAAA) <sub>21</sub> | 27 | 302 |
| DYF399S1 | (GAAA) <sub>3</sub> N <sub>8</sub> (GAAA) <sub>15</sub> | (GAAA) <sub>3</sub> N <sub>8</sub> (GAAA) <sub>16</sub> | 38 | 336 |
| DYF399S1 | (GAAA) <sub>3</sub> N <sub>7</sub> (GAAA) <sub>18</sub> | (GAAA) <sub>3</sub> N <sub>8</sub> (GAAA) <sub>17</sub> | 50 | 356 |
| DYF399S1 | (GAAA) <sub>3</sub> N <sub>7</sub> (GAAA) <sub>21</sub> | (GAAA) <sub>3</sub> N <sub>8</sub> (GAAA) <sub>22</sub> | 28 | 367 |
| DYF399S1 | (GAAA) <sub>3</sub> N <sub>8</sub> (GAAA) <sub>16</sub> | (GAAA) <sub>3</sub> N <sub>8</sub> (GAAA) <sub>17</sub> | 34 | 372 |
| DYF399S1 | (GAAA) <sub>3</sub> N <sub>7</sub> (GAAA) <sub>21</sub> | (GAAA) <sub>3</sub> N <sub>8</sub> (GAAA) <sub>22</sub> | 28 | 373 |
| DYF399S1 | (GAAA) <sub>3</sub> N <sub>7</sub> (GAAA) <sub>18</sub> | (GAAA) <sub>3</sub> N <sub>8</sub> (GAAA) <sub>17</sub> | 35 | 389 |
| DYF399S1 | (GAAA) <sub>3</sub> N <sub>8</sub> (GAAA) <sub>16</sub> | (GAAA) <sub>3</sub> N <sub>8</sub> (GAAA) <sub>17</sub> | 32 | 401 |
| DYF399S1 | (GAAA) <sub>3</sub> N <sub>7</sub> (GAAA) <sub>18</sub> | (GAAA) <sub>3</sub> N <sub>8</sub> (GAAA) <sub>17</sub> | 53 | 453 |
| DYF399S1 | (GAAA) <sub>3</sub> N <sub>8</sub> (GAAA) <sub>17</sub> | (GAAA) <sub>3</sub> N <sub>7</sub> (GAAA) <sub>18</sub> | 34 | 459 |

|          |                                                         |                                                         |    |     |
|----------|---------------------------------------------------------|---------------------------------------------------------|----|-----|
| DYF399S1 | (GAAA) <sub>3</sub> N <sub>8</sub> (GAAA) <sub>17</sub> | (GAAA) <sub>3</sub> N <sub>8</sub> (GAAA) <sub>16</sub> | 26 | 480 |
| DYF399S1 | (GAAA) <sub>3</sub> N <sub>7</sub> (GAAA) <sub>18</sub> | (GAAA) <sub>3</sub> N <sub>8</sub> (GAAA) <sub>19</sub> | 28 | 484 |
| DYF399S1 | (GAAA) <sub>3</sub> N <sub>8</sub> (GAAA) <sub>19</sub> | (GAAA) <sub>3</sub> N <sub>7</sub> (GAAA) <sub>18</sub> | 26 | 488 |
| DYF399S1 | (GAAA) <sub>3</sub> N <sub>7</sub> (GAAA) <sub>21</sub> | (GAAA) <sub>3</sub> N <sub>8</sub> (GAAA) <sub>20</sub> | 39 | 492 |
| DYF399S1 | (GAAA) <sub>3</sub> N <sub>8</sub> (GAAA) <sub>19</sub> | (GAAA) <sub>3</sub> N <sub>8</sub> (GAAA) <sub>20</sub> | 27 | 494 |
| DYF399S1 | (GAAA) <sub>3</sub> N <sub>8</sub> (GAAA) <sub>19</sub> | (GAAA) <sub>3</sub> N <sub>8</sub> (GAAA) <sub>20</sub> | 35 | 500 |
| DYF399S1 | (GAAA) <sub>3</sub> N <sub>8</sub> (GAAA) <sub>16</sub> | (GAAA) <sub>3</sub> N <sub>8</sub> (GAAA) <sub>15</sub> | 19 | 546 |
| DYF399S1 | (GAAA) <sub>3</sub> N <sub>8</sub> (GAAA) <sub>19</sub> | (GAAA) <sub>3</sub> N <sub>8</sub> (GAAA) <sub>20</sub> | 34 | 559 |
| DYF399S1 | (GAAA) <sub>3</sub> N <sub>7</sub> (GAAA) <sub>21</sub> | (GAAA) <sub>3</sub> N <sub>8</sub> (GAAA) <sub>22</sub> | 30 | 586 |
| DYF399S1 | (GAAA) <sub>3</sub> N <sub>8</sub> (GAAA) <sub>20</sub> | (GAAA) <sub>3</sub> N <sub>8</sub> (GAAA) <sub>19</sub> | 29 | 603 |
| DYF399S1 | (GAAA) <sub>3</sub> N <sub>7</sub> (GAAA) <sub>18</sub> | (GAAA) <sub>3</sub> N <sub>8</sub> (GAAA) <sub>17</sub> | 56 | 608 |
| DYF399S1 | (GAAA) <sub>3</sub> N <sub>8</sub> (GAAA) <sub>19</sub> | (GAAA) <sub>3</sub> N <sub>7</sub> (GAAA) <sub>18</sub> | 32 | 614 |
| DYF399S1 | (GAAA) <sub>3</sub> N <sub>8</sub> (GAAA) <sub>17</sub> | (GAAA) <sub>3</sub> N <sub>8</sub> (GAAA) <sub>16</sub> | 43 | 624 |
| DYF399S1 | (GAAA) <sub>3</sub> N <sub>8</sub> (GAAA) <sub>20</sub> | (GAAA) <sub>3</sub> N <sub>8</sub> (GAAA) <sub>19</sub> | 25 | 630 |
| DYF399S1 | (GAAA) <sub>3</sub> N <sub>7</sub> (GAAA) <sub>21</sub> | (GAAA) <sub>3</sub> N <sub>8</sub> (GAAA) <sub>20</sub> | 30 | 640 |
| DYF399S1 | (GAAA) <sub>3</sub> N <sub>8</sub> (GAAA) <sub>19</sub> | (GAAA) <sub>3</sub> N <sub>7</sub> (GAAA) <sub>18</sub> | 43 | 657 |
| DYF399S1 | (GAAA) <sub>3</sub> N <sub>8</sub> (GAAA) <sub>22</sub> | (GAAA) <sub>3</sub> N <sub>7</sub> (GAAA) <sub>21</sub> | 25 | 666 |
| DYF399S1 | (GAAA) <sub>3</sub> N <sub>8</sub> (GAAA) <sub>19</sub> | (GAAA) <sub>3</sub> N <sub>8</sub> (GAAA) <sub>20</sub> | 23 | 675 |
| DYF399S1 | (GAAA) <sub>3</sub> N <sub>8</sub> (GAAA) <sub>19</sub> | (GAAA) <sub>3</sub> N <sub>7</sub> (GAAA) <sub>18</sub> | 18 | 680 |
| DYF399S1 | (GAAA) <sub>3</sub> N <sub>7</sub> (GAAA) <sub>18</sub> | (GAAA) <sub>3</sub> N <sub>8</sub> (GAAA) <sub>19</sub> | 23 | 687 |
| DYF399S1 | (GAAA) <sub>3</sub> N <sub>8</sub> (GAAA) <sub>17</sub> | (GAAA) <sub>3</sub> N <sub>7</sub> (GAAA) <sub>18</sub> | 20 | 706 |
| DYF399S1 | (GAAA) <sub>3</sub> N <sub>8</sub> (GAAA) <sub>19</sub> | (GAAA) <sub>3</sub> N <sub>8</sub> (GAAA) <sub>20</sub> | 33 | 718 |
| DYF399S1 | (GAAA) <sub>3</sub> N <sub>8</sub> (GAAA) <sub>15</sub> | (GAAA) <sub>3</sub> N <sub>8</sub> (GAAA) <sub>16</sub> | 21 | 720 |
| DYF399S1 | (GAAA) <sub>3</sub> N <sub>8</sub> (GAAA) <sub>15</sub> | (GAAA) <sub>3</sub> N <sub>8</sub> (GAAA) <sub>14</sub> | 22 | 747 |
| DYF399S1 | (GAAA) <sub>3</sub> N <sub>8</sub> (GAAA) <sub>20</sub> | (GAAA) <sub>3</sub> N <sub>8</sub> (GAAA) <sub>19</sub> | 28 | 772 |
| DYF399S1 | (GAAA) <sub>3</sub> N <sub>8</sub> (GAAA) <sub>16</sub> | (GAAA) <sub>3</sub> N <sub>8</sub> (GAAA) <sub>15</sub> | 28 | 805 |

|          |                                                         |                                                         |    |      |
|----------|---------------------------------------------------------|---------------------------------------------------------|----|------|
| DYF399S1 | (GAAA) <sub>3</sub> N <sub>8</sub> (GAAA) <sub>22</sub> | (GAAA) <sub>3</sub> N <sub>8</sub> (GAAA) <sub>20</sub> | 22 | 817  |
| DYF399S1 | (GAAA) <sub>3</sub> N <sub>7</sub> (GAAA) <sub>21</sub> | (GAAA) <sub>3</sub> N <sub>8</sub> (GAAA) <sub>20</sub> | 20 | 824  |
| DYF399S1 | (GAAA) <sub>3</sub> N <sub>8</sub> (GAAA) <sub>20</sub> | (GAAA) <sub>3</sub> N <sub>8</sub> (GAAA) <sub>19</sub> | 20 | 827  |
| DYF399S1 | (GAAA) <sub>3</sub> N <sub>8</sub> (GAAA) <sub>19</sub> | (GAAA) <sub>3</sub> N <sub>7</sub> (GAAA) <sub>18</sub> | 25 | 877  |
| DYF399S1 | (GAAA) <sub>3</sub> N <sub>8</sub> (GAAA) <sub>20</sub> | (GAAA) <sub>3</sub> N <sub>8</sub> (GAAA) <sub>19</sub> | 31 | 881  |
| DYF399S1 | (GAAA) <sub>3</sub> N <sub>8</sub> (GAAA) <sub>19</sub> | (GAAA) <sub>3</sub> N <sub>7</sub> (GAAA) <sub>18</sub> | 19 | 900  |
| DYF399S1 | (GAAA) <sub>3</sub> N <sub>8</sub> (GAAA) <sub>16</sub> | (GAAA) <sub>3</sub> N <sub>8</sub> (GAAA) <sub>17</sub> | 37 | 904  |
| DYF399S1 | (GAAA) <sub>3</sub> N <sub>8</sub> (GAAA) <sub>15</sub> | (GAAA) <sub>3</sub> N <sub>8</sub> (GAAA) <sub>14</sub> | 34 | 911  |
| DYF399S1 | (GAAA) <sub>3</sub> N <sub>7</sub> (GAAA) <sub>18</sub> | (GAAA) <sub>3</sub> N <sub>8</sub> (GAAA) <sub>17</sub> | 19 | 916  |
| DYF399S1 | (GAAA) <sub>3</sub> N <sub>7</sub> (GAAA) <sub>18</sub> | (GAAA) <sub>3</sub> N <sub>8</sub> (GAAA) <sub>16</sub> | 24 | 926  |
| DYF399S1 | (GAAA) <sub>3</sub> N <sub>8</sub> (GAAA) <sub>19</sub> | (GAAA) <sub>3</sub> N <sub>7</sub> (GAAA) <sub>18</sub> | 22 | 986  |
| DYF399S1 | (GAAA) <sub>3</sub> N <sub>8</sub> (GAAA) <sub>20</sub> | (GAAA) <sub>3</sub> N <sub>7</sub> (GAAA) <sub>21</sub> | 36 | 989  |
| DYF399S1 | (GAAA) <sub>3</sub> N <sub>7</sub> (GAAA) <sub>18</sub> | (GAAA) <sub>3</sub> N <sub>8</sub> (GAAA) <sub>17</sub> | 35 | 1001 |
| DYF399S1 | (GAAA) <sub>3</sub> N <sub>7</sub> (GAAA) <sub>21</sub> | (GAAA) <sub>3</sub> N <sub>8</sub> (GAAA) <sub>20</sub> | 41 | 1008 |
| DYF399S1 | (GAAA) <sub>3</sub> N <sub>8</sub> (GAAA) <sub>20</sub> | (GAAA) <sub>3</sub> N <sub>8</sub> (GAAA) <sub>19</sub> | 41 | 1008 |
| DYF399S1 | (GAAA) <sub>3</sub> N <sub>8</sub> (GAAA) <sub>16</sub> | (GAAA) <sub>3</sub> N <sub>8</sub> (GAAA) <sub>15</sub> | 33 | 1046 |
| DYF399S1 | (GAAA) <sub>3</sub> N <sub>8</sub> (GAAA) <sub>15</sub> | (GAAA) <sub>3</sub> N <sub>8</sub> (GAAA) <sub>16</sub> | 33 | 1046 |
| DYF399S1 | (GAAA) <sub>3</sub> N <sub>8</sub> (GAAA) <sub>19</sub> | (GAAA) <sub>3</sub> N <sub>7</sub> (GAAA) <sub>18</sub> | 31 | 1072 |
| DYF399S1 | (GAAA) <sub>3</sub> N <sub>8</sub> (GAAA) <sub>20</sub> | (GAAA) <sub>3</sub> N <sub>8</sub> (GAAA) <sub>19</sub> | 22 | 1088 |
| DYF399S1 | (GAAA) <sub>3</sub> N <sub>7</sub> (GAAA) <sub>18</sub> | (GAAA) <sub>3</sub> N <sub>8</sub> (GAAA) <sub>19</sub> | 36 | 1091 |
| DYF399S1 | (GAAA) <sub>3</sub> N <sub>8</sub> (GAAA) <sub>15</sub> | (GAAA) <sub>3</sub> N <sub>8</sub> (GAAA) <sub>16</sub> | 23 | 1095 |
| DYF399S1 | (GAAA) <sub>3</sub> N <sub>8</sub> (GAAA) <sub>17</sub> | (GAAA) <sub>3</sub> N <sub>7</sub> (GAAA) <sub>18</sub> | 25 | 1104 |
| DYF399S1 | (GAAA) <sub>3</sub> N <sub>8</sub> (GAAA) <sub>20</sub> | (GAAA) <sub>3</sub> N <sub>8</sub> (GAAA) <sub>19</sub> | 43 | 1138 |
| DYF399S1 | (GAAA) <sub>3</sub> N <sub>7</sub> (GAAA) <sub>18</sub> | (GAAA) <sub>3</sub> N <sub>8</sub> (GAAA) <sub>17</sub> | 20 | 1154 |
| DYF399S1 | (GAAA) <sub>3</sub> N <sub>8</sub> (GAAA) <sub>17</sub> | (GAAA) <sub>3</sub> N <sub>8</sub> (GAAA) <sub>16</sub> | 36 | 1155 |
| DYF399S1 | (GAAA) <sub>3</sub> N <sub>8</sub> (GAAA) <sub>16</sub> | (GAAA) <sub>3</sub> N <sub>8</sub> (GAAA) <sub>17</sub> | 34 | 1158 |

|          |                                                         |                                                         |         |      |
|----------|---------------------------------------------------------|---------------------------------------------------------|---------|------|
| DYF399S1 | (GAAA) <sub>3</sub> N <sub>8</sub> (GAAA) <sub>22</sub> | (GAAA) <sub>3</sub> N <sub>7</sub> (GAAA) <sub>21</sub> | 34      | 1158 |
| DYF399S1 | (GAAA) <sub>3</sub> N <sub>7</sub> (GAAA) <sub>18</sub> | (GAAA) <sub>3</sub> N <sub>8</sub> (GAAA) <sub>17</sub> | 43      | 1159 |
| DYF399S1 | (GAAA) <sub>3</sub> N <sub>8</sub> (GAAA) <sub>13</sub> | (GAAA) <sub>3</sub> N <sub>8</sub> (GAAA) <sub>14</sub> | 21      | 1163 |
| DYF399S1 | (GAAA) <sub>3</sub> N <sub>8</sub> (GAAA) <sub>19</sub> | (GAAA) <sub>3</sub> N <sub>7</sub> (GAAA) <sub>18</sub> | 21      | 1207 |
| DYF399S1 | (GAAA) <sub>3</sub> N <sub>7</sub> (GAAA) <sub>21</sub> | (GAAA) <sub>3</sub> N <sub>8</sub> (GAAA) <sub>20</sub> | Unknown | 1263 |
| DYF399S1 | (GAAA) <sub>3</sub> N <sub>7</sub> (GAAA) <sub>18</sub> | (GAAA) <sub>3</sub> N <sub>8</sub> (GAAA) <sub>19</sub> | Unknown | 1265 |
| DYF399S1 | (GAAA) <sub>3</sub> N <sub>8</sub> (GAAA) <sub>20</sub> | (GAAA) <sub>3</sub> N <sub>8</sub> (GAAA) <sub>19</sub> | Unknown | 1268 |
| DYF399S1 | (GAAA) <sub>3</sub> N <sub>8</sub> (GAAA) <sub>17</sub> | (GAAA) <sub>3</sub> N <sub>8</sub> (GAAA) <sub>16</sub> | 39      | 1327 |
| DYF399S1 | (GAAA) <sub>3</sub> N <sub>7</sub> (GAAA) <sub>21</sub> | (GAAA) <sub>3</sub> N <sub>8</sub> (GAAA) <sub>20</sub> | 27      | 1397 |
| DYF399S1 | (GAAA) <sub>3</sub> N <sub>8</sub> (GAAA) <sub>14</sub> | (GAAA) <sub>3</sub> N <sub>8</sub> (GAAA) <sub>13</sub> | 42      | 1407 |
| DYF399S1 | (GAAA) <sub>3</sub> N <sub>8</sub> (GAAA) <sub>19</sub> | (GAAA) <sub>3</sub> N <sub>7</sub> (GAAA) <sub>18</sub> | 42      | 1411 |
| DYF399S1 | (GAAA) <sub>3</sub> N <sub>8</sub> (GAAA) <sub>22</sub> | (GAAA) <sub>3</sub> N <sub>7</sub> (GAAA) <sub>21</sub> | 40      | 1443 |
| DYF399S1 | (GAAA) <sub>3</sub> N <sub>8</sub> (GAAA) <sub>17</sub> | (GAAA) <sub>3</sub> N <sub>8</sub> (GAAA) <sub>16</sub> | 17      | 1446 |
| DYF399S1 | (GAAA) <sub>3</sub> N <sub>8</sub> (GAAA) <sub>17</sub> | (GAAA) <sub>3</sub> N <sub>8</sub> (GAAA) <sub>16</sub> | 24      | 1455 |
| DYF399S1 | (GAAA) <sub>3</sub> N <sub>7</sub> (GAAA) <sub>18</sub> | (GAAA) <sub>3</sub> N <sub>8</sub> (GAAA) <sub>19</sub> | 18      | 1456 |
| DYF399S1 | (GAAA) <sub>3</sub> N <sub>8</sub> (GAAA) <sub>15</sub> | (GAAA) <sub>3</sub> N <sub>8</sub> (GAAA) <sub>16</sub> | 24      | 1466 |
| DYF399S1 | (GAAA) <sub>3</sub> N <sub>8</sub> (GAAA) <sub>20</sub> | (GAAA) <sub>3</sub> N <sub>7</sub> (GAAA) <sub>21</sub> | 24      | 1466 |
| DYF399S1 | (GAAA) <sub>3</sub> N <sub>8</sub> (GAAA) <sub>17</sub> | (GAAA) <sub>3</sub> N <sub>7</sub> (GAAA) <sub>18</sub> | 39      | 1471 |
| DYF399S1 | (GAAA) <sub>3</sub> N <sub>8</sub> (GAAA) <sub>14</sub> | (GAAA) <sub>3</sub> N <sub>8</sub> (GAAA) <sub>15</sub> | Unknown | 1479 |
| DYF399S1 | (GAAA) <sub>3</sub> N <sub>8</sub> (GAAA) <sub>19</sub> | (GAAA) <sub>3</sub> N <sub>7</sub> (GAAA) <sub>18</sub> | 28      | 1554 |
| DYF399S1 | (GAAA) <sub>3</sub> N <sub>8</sub> (GAAA) <sub>19</sub> | (GAAA) <sub>3</sub> N <sub>8</sub> (GAAA) <sub>20</sub> | 37      | 1577 |
| DYF399S1 | (GAAA) <sub>3</sub> N <sub>8</sub> (GAAA) <sub>17</sub> | (GAAA) <sub>3</sub> N <sub>7</sub> (GAAA) <sub>18</sub> | 40      | 1606 |
| DYF399S1 | (GAAA) <sub>3</sub> N <sub>8</sub> (GAAA) <sub>19</sub> | (GAAA) <sub>3</sub> N <sub>7</sub> (GAAA) <sub>18</sub> | 25      | 1612 |
| DYF399S1 | (GAAA) <sub>3</sub> N <sub>8</sub> (GAAA) <sub>17</sub> | (GAAA) <sub>3</sub> N <sub>8</sub> (GAAA) <sub>16</sub> | 17      | 1620 |
| DYF399S1 | (GAAA) <sub>3</sub> N <sub>8</sub> (GAAA) <sub>20</sub> | (GAAA) <sub>3</sub> N <sub>8</sub> (GAAA) <sub>19</sub> | Unknown | 1650 |
| DYF399S1 | (GAAA) <sub>3</sub> N <sub>7</sub> (GAAA) <sub>18</sub> | (GAAA) <sub>3</sub> N <sub>8</sub> (GAAA) <sub>19</sub> | 24      | 1651 |

|          |                                                                                                                                                                                                                                         |                                                                                                                                                                                                                                         |    |      |
|----------|-----------------------------------------------------------------------------------------------------------------------------------------------------------------------------------------------------------------------------------------|-----------------------------------------------------------------------------------------------------------------------------------------------------------------------------------------------------------------------------------------|----|------|
| DYF399S1 | (GAAA) <sub>3</sub> N <sub>8</sub> (GAAA) <sub>19</sub>                                                                                                                                                                                 | (GAAA) <sub>3</sub> N <sub>7</sub> (GAAA) <sub>18</sub>                                                                                                                                                                                 | 24 | 1658 |
| DYF399S1 | (GAAA) <sub>3</sub> N <sub>8</sub> (GAAA) <sub>14</sub>                                                                                                                                                                                 | (GAAA) <sub>3</sub> N <sub>8</sub> (GAAA) <sub>15</sub>                                                                                                                                                                                 | 37 | 1663 |
| DYF399S1 | (GAAA) <sub>3</sub> N <sub>8</sub> (GAAA) <sub>22</sub>                                                                                                                                                                                 | (GAAA) <sub>3</sub> N <sub>7</sub> (GAAA) <sub>21</sub>                                                                                                                                                                                 | 32 | 1664 |
| DYF399S1 | (GAAA) <sub>3</sub> N <sub>8</sub> (GAAA) <sub>16</sub>                                                                                                                                                                                 | (GAAA) <sub>3</sub> N <sub>8</sub> (GAAA) <sub>20</sub>                                                                                                                                                                                 | 17 | 1665 |
| DYF399S1 | (GAAA) <sub>3</sub> N <sub>8</sub> (GAAA) <sub>15</sub>                                                                                                                                                                                 | (GAAA) <sub>3</sub> N <sub>8</sub> (GAAA) <sub>14</sub>                                                                                                                                                                                 | 20 | 1670 |
| DYF399S1 | (GAAA) <sub>3</sub> N <sub>7</sub> (GAAA) <sub>18</sub>                                                                                                                                                                                 | (GAAA) <sub>3</sub> N <sub>8</sub> (GAAA) <sub>19</sub>                                                                                                                                                                                 | 34 | 1691 |
| DYF399S1 | (GAAA) <sub>3</sub> N <sub>8</sub> (GAAA) <sub>20</sub>                                                                                                                                                                                 | (GAAA) <sub>3</sub> N <sub>7</sub> (GAAA) <sub>21</sub>                                                                                                                                                                                 | 28 | 1696 |
| DYF399S1 | (GAAA) <sub>3</sub> N <sub>8</sub> (GAAA) <sub>19</sub>                                                                                                                                                                                 | (GAAA) <sub>3</sub> N <sub>7</sub> (GAAA) <sub>18</sub>                                                                                                                                                                                 | 23 | 1722 |
| DYF399S1 | (GAAA) <sub>3</sub> N <sub>8</sub> (GAAA) <sub>16</sub>                                                                                                                                                                                 | (GAAA) <sub>3</sub> N <sub>8</sub> (GAAA) <sub>17</sub>                                                                                                                                                                                 | 30 | 1733 |
| DYF399S1 | (GAAA) <sub>3</sub> N <sub>8</sub> (GAAA) <sub>20</sub>                                                                                                                                                                                 | (GAAA) <sub>3</sub> N <sub>7</sub> (GAAA) <sub>21</sub>                                                                                                                                                                                 | 26 | 1760 |
| DYF399S1 | (GAAA) <sub>3</sub> N <sub>8</sub> (GAAA) <sub>17</sub>                                                                                                                                                                                 | (GAAA) <sub>3</sub> N <sub>7</sub> (GAAA) <sub>18</sub>                                                                                                                                                                                 | 29 | 1773 |
| DYF399S1 | (GAAA) <sub>3</sub> N <sub>8</sub> (GAAA) <sub>20</sub>                                                                                                                                                                                 | (GAAA) <sub>3</sub> N <sub>8</sub> (GAAA) <sub>19</sub>                                                                                                                                                                                 | 31 | 1798 |
| DYF399S1 | (GAAA) <sub>3</sub> N <sub>8</sub> (GAAA) <sub>15</sub>                                                                                                                                                                                 | (GAAA) <sub>3</sub> N <sub>8</sub> (GAAA) <sub>16</sub>                                                                                                                                                                                 | 51 | 1813 |
| DYF399S1 | (GAAA) <sub>3</sub> N <sub>7</sub> (GAAA) <sub>21</sub>                                                                                                                                                                                 | (GAAA) <sub>3</sub> N <sub>8</sub> (GAAA) <sub>20</sub>                                                                                                                                                                                 | 19 | 1841 |
| DYF399S1 | (GAAA) <sub>3</sub> N <sub>8</sub> (GAAA) <sub>22</sub>                                                                                                                                                                                 | (GAAA) <sub>3</sub> N <sub>7</sub> (GAAA) <sub>21</sub>                                                                                                                                                                                 | 55 | 1844 |
| DYF399S1 | (GAAA) <sub>3</sub> N <sub>8</sub> (GAAA) <sub>22</sub>                                                                                                                                                                                 | (GAAA) <sub>3</sub> N <sub>8</sub> (GAAA) <sub>23</sub>                                                                                                                                                                                 | 59 | 1867 |
| DYF399S1 | (GAAA) <sub>3</sub> N <sub>8</sub> (GAAA) <sub>17</sub>                                                                                                                                                                                 | (GAAA) <sub>3</sub> N <sub>8</sub> (GAAA) <sub>16</sub>                                                                                                                                                                                 | 53 | 1869 |
| DYF399S1 | (GAAA) <sub>3</sub> N <sub>8</sub> (GAAA) <sub>16</sub>                                                                                                                                                                                 | (GAAA) <sub>3</sub> N <sub>8</sub> (GAAA) <sub>15</sub>                                                                                                                                                                                 | 73 | 1884 |
| DYF399S1 | (GAAA) <sub>3</sub> N <sub>7</sub> (GAAA) <sub>18</sub>                                                                                                                                                                                 | (GAAA) <sub>3</sub> N <sub>8</sub> (GAAA) <sub>19</sub>                                                                                                                                                                                 | 52 | 1891 |
| DYF399S1 | (GAAA) <sub>3</sub> N <sub>7</sub> (GAAA) <sub>21</sub>                                                                                                                                                                                 | (GAAA) <sub>3</sub> N <sub>8</sub> (GAAA) <sub>20</sub>                                                                                                                                                                                 | 52 | 1891 |
| DYF399S1 | (GAAA) <sub>3</sub> N <sub>8</sub> (GAAA) <sub>16</sub>                                                                                                                                                                                 | (GAAA) <sub>3</sub> N <sub>8</sub> (GAAA) <sub>15</sub>                                                                                                                                                                                 | 55 | 1909 |
| DYF399S1 | (GAAA) <sub>3</sub> N <sub>8</sub> (GAAA) <sub>19</sub>                                                                                                                                                                                 | (GAAA) <sub>3</sub> N <sub>7</sub> (GAAA) <sub>18</sub>                                                                                                                                                                                 | 60 | 1913 |
| DYF399S1 | (GAAA) <sub>3</sub> N <sub>8</sub> (GAAA) <sub>17</sub>                                                                                                                                                                                 | (GAAA) <sub>3</sub> N <sub>8</sub> (GAAA) <sub>16</sub>                                                                                                                                                                                 | 50 | 1941 |
| DYF401S1 | (AAGG) <sub>3</sub> (AAGC) <sub>1</sub> (AAGG) <sub>3</sub> N <sub>39</sub> (AAGG) <sub>3</sub> N <sub>8</sub> (AAGG) <sub>3</sub><br>(AAAG) <sub>1</sub> (AAGG) <sub>3</sub> N <sub>13</sub> (AAAG) <sub>15</sub> G(AAGG) <sub>6</sub> | (AAGG) <sub>3</sub> (AAGC) <sub>1</sub> (AAGG) <sub>3</sub> N <sub>39</sub> (AAGG) <sub>3</sub> N <sub>8</sub> (AAGG) <sub>3</sub><br>(AAAG) <sub>1</sub> (AAGG) <sub>3</sub> N <sub>13</sub> (AAAG) <sub>16</sub> G(AAGG) <sub>6</sub> | 37 | 36   |
| DYF401S1 | (AAGG) <sub>3</sub> (AAGC) <sub>1</sub> (AAGG) <sub>3</sub> N <sub>39</sub> (AAGG) <sub>3</sub> N <sub>8</sub> (AAGG) <sub>3</sub><br>(AAAG) <sub>1</sub> (AAGG) <sub>3</sub> N <sub>13</sub> (AAAG) <sub>17</sub> G(AAGG) <sub>6</sub> | (AAGG) <sub>3</sub> (AAGC) <sub>1</sub> (AAGG) <sub>3</sub> N <sub>39</sub> (AAGG) <sub>3</sub> N <sub>8</sub> (AAGG) <sub>3</sub><br>(AAAG) <sub>1</sub> (AAGG) <sub>3</sub> N <sub>13</sub> (AAAG) <sub>15</sub> G(AAGG) <sub>6</sub> | 34 | 372  |
| DYF401S1 | (AAGG) <sub>3</sub> (AAGC) <sub>1</sub> (AAGG) <sub>3</sub> N <sub>39</sub> (AAGG) <sub>3</sub> N <sub>8</sub> (AAGG) <sub>3</sub>                                                                                                      | (AAGG) <sub>3</sub> (AAGC) <sub>1</sub> (AAGG) <sub>3</sub> N <sub>39</sub> (AAGG) <sub>3</sub> N <sub>8</sub> (AAGG) <sub>3</sub>                                                                                                      | 28 | 674  |

|           | (AAAG) <sub>1</sub> (AAGG) <sub>3</sub> N <sub>13</sub> (AAAG) <sub>15</sub> G(AAGG) <sub>6</sub>                                                                                                                                       | (AAAG) <sub>1</sub> (AAGG) <sub>3</sub> N <sub>13</sub> (AAAG) <sub>16</sub> G(AAGG) <sub>6</sub>                                                                                                                                       |         |      |
|-----------|-----------------------------------------------------------------------------------------------------------------------------------------------------------------------------------------------------------------------------------------|-----------------------------------------------------------------------------------------------------------------------------------------------------------------------------------------------------------------------------------------|---------|------|
| DYF401S1  | (AAGG) <sub>3</sub> (AAGC) <sub>1</sub> (AAGG) <sub>3</sub> N <sub>39</sub> (AAGG) <sub>3</sub> N <sub>8</sub> (AAGG) <sub>3</sub><br>(AAAG) <sub>1</sub> (AAGG) <sub>3</sub> N <sub>13</sub> (AAAG) <sub>15</sub> G(AAGG) <sub>6</sub> | (AAGG) <sub>3</sub> (AAGC) <sub>1</sub> (AAGG) <sub>3</sub> N <sub>39</sub> (AAGG) <sub>3</sub> N <sub>8</sub> (AAGG) <sub>3</sub><br>(AAAG) <sub>1</sub> (AAGG) <sub>3</sub> N <sub>13</sub> (AAAG) <sub>16</sub> G(AAGG) <sub>6</sub> | 21      | 769  |
| DYF401S1  | (AAGG) <sub>3</sub> (AAGC) <sub>1</sub> (AAGG) <sub>3</sub> N <sub>39</sub> (AAGG) <sub>3</sub> N <sub>8</sub> (AAGG) <sub>3</sub><br>(AAAG) <sub>1</sub> (AAGG) <sub>3</sub> N <sub>13</sub> (AAAG) <sub>15</sub> G(AAGG) <sub>6</sub> | (AAGG) <sub>3</sub> (AAGC) <sub>1</sub> (AAGG) <sub>3</sub> N <sub>39</sub> (AAGG) <sub>3</sub> N <sub>8</sub> (AAGG) <sub>3</sub><br>(AAAG) <sub>1</sub> (AAGG) <sub>3</sub> N <sub>13</sub> (AAAG) <sub>14</sub> G(AAGG) <sub>6</sub> | Unknown | 1241 |
| DYF401S1  | (AAGG) <sub>3</sub> (AAGC) <sub>1</sub> (AAGG) <sub>3</sub> N <sub>39</sub> (AAGG) <sub>3</sub> N <sub>8</sub> (AAGG) <sub>3</sub><br>(AAAG) <sub>1</sub> (AAGG) <sub>3</sub> N <sub>13</sub> (AAAG) <sub>16</sub> G(AAGG) <sub>6</sub> | (AAGG) <sub>3</sub> (AAGC) <sub>1</sub> (AAGG) <sub>3</sub> N <sub>39</sub> (AAGG) <sub>3</sub> N <sub>8</sub> (AAGG) <sub>3</sub><br>(AAAG) <sub>1</sub> (AAGG) <sub>3</sub> N <sub>13</sub> (AAAG) <sub>15</sub> G(AAGG) <sub>6</sub> | 56      | 1272 |
| DYF401S1  | (AAGG) <sub>3</sub> (AAGC) <sub>1</sub> (AAGG) <sub>3</sub> N <sub>39</sub> (AAGG) <sub>3</sub> N <sub>8</sub> (AAGG) <sub>3</sub><br>(AAAG) <sub>1</sub> (AAGG) <sub>3</sub> N <sub>13</sub> (AAAG) <sub>16</sub> G(AAGG) <sub>6</sub> | (AAGG) <sub>3</sub> (AAGC) <sub>1</sub> (AAGG) <sub>3</sub> N <sub>39</sub> (AAGG) <sub>3</sub> N <sub>8</sub> (AAGG) <sub>3</sub><br>(AAAG) <sub>1</sub> (AAGG) <sub>3</sub> N <sub>13</sub> (AAAG) <sub>15</sub> G(AAGG) <sub>6</sub> | 31      | 1518 |
| DYF401S1  | (AAGG) <sub>3</sub> (AAGC) <sub>1</sub> (AAGG) <sub>3</sub> N <sub>39</sub> (AAGG) <sub>3</sub> N <sub>8</sub> (AAGG) <sub>3</sub><br>(AAAG) <sub>1</sub> (AAGG) <sub>3</sub> N <sub>13</sub> (AAAG) <sub>17</sub> G(AAGG) <sub>6</sub> | (AAGG) <sub>3</sub> (AAGC) <sub>1</sub> (AAGG) <sub>3</sub> N <sub>39</sub> (AAGG) <sub>3</sub> N <sub>8</sub> (AAGG) <sub>3</sub><br>(AAAG) <sub>1</sub> (AAGG) <sub>3</sub> N <sub>13</sub> (AAAG) <sub>15</sub> G(AAGG) <sub>6</sub> | 28      | 1734 |
| DYF403S1a | 342                                                                                                                                                                                                                                     | 338                                                                                                                                                                                                                                     | 20      | 73   |
| DYF403S1a | 321                                                                                                                                                                                                                                     | 316                                                                                                                                                                                                                                     | 32      | 128  |
| DYF403S1a | 316                                                                                                                                                                                                                                     | 321                                                                                                                                                                                                                                     | 27      | 132  |
| DYF403S1a | 316,329,338                                                                                                                                                                                                                             | 321,325,334                                                                                                                                                                                                                             | 17      | 175  |
| DYF403S1a | 346                                                                                                                                                                                                                                     | 350                                                                                                                                                                                                                                     | 37      | 186  |
| DYF403S1a | 342                                                                                                                                                                                                                                     | 346                                                                                                                                                                                                                                     | 22      | 201  |
| DYF403S1a | 354                                                                                                                                                                                                                                     | 350                                                                                                                                                                                                                                     | 37      | 406  |
| DYF403S1a | 350                                                                                                                                                                                                                                     | 354                                                                                                                                                                                                                                     | 20      | 423  |
| DYF403S1a | 342                                                                                                                                                                                                                                     | 346                                                                                                                                                                                                                                     | 19      | 546  |
| DYF403S1a | 325                                                                                                                                                                                                                                     | 329                                                                                                                                                                                                                                     | 24      | 681  |
| DYF403S1a | 325                                                                                                                                                                                                                                     | 321                                                                                                                                                                                                                                     | 39      | 749  |
| DYF403S1a | 334                                                                                                                                                                                                                                     | 338                                                                                                                                                                                                                                     | 22      | 817  |
| DYF403S1a | 321                                                                                                                                                                                                                                     | 342                                                                                                                                                                                                                                     | 28      | 841  |
| DYF403S1a | 338                                                                                                                                                                                                                                     | 342                                                                                                                                                                                                                                     | 37      | 904  |
| DYF403S1a | 308                                                                                                                                                                                                                                     | 312                                                                                                                                                                                                                                     | 34      | 911  |
| DYF403S1a | 342                                                                                                                                                                                                                                     | 346                                                                                                                                                                                                                                     | 18      | 943  |
| DYF403S1a | 312                                                                                                                                                                                                                                     | 316                                                                                                                                                                                                                                     | 20      | 977  |
| DYF403S1a | 342                                                                                                                                                                                                                                     | 346                                                                                                                                                                                                                                     | 46      | 1033 |
| DYF403S1a | 321                                                                                                                                                                                                                                     | 316                                                                                                                                                                                                                                     | 21      | 1053 |
| DYF403S1a | 350                                                                                                                                                                                                                                     | 354                                                                                                                                                                                                                                     | 39      | 1071 |
| DYF403S1a | 342                                                                                                                                                                                                                                     | 346                                                                                                                                                                                                                                     | 27      | 1085 |

|           |         |         |         |      |
|-----------|---------|---------|---------|------|
| DYF403S1a | 325     | 329     | 44      | 1110 |
| DYF403S1a | 342     | 338     | 22      | 1323 |
| DYF403S1a | 346     | 350     | 36      | 1336 |
| DYF403S1a | 312     | 316     | Unknown | 1353 |
| DYF403S1a | 354     | 350     | 45      | 1364 |
| DYF403S1a | 342     | 338     | 44      | 1378 |
| DYF403S1a | 342     | 338     | 42      | 1411 |
| DYF403S1a | 346     | 350     | 42      | 1441 |
| DYF403S1a | 338     | 342     | 24      | 1480 |
| DYF403S1a | 325     | 329     | 40      | 1531 |
| DYF403S1a | 346     | 342     | 28      | 1554 |
| DYF403S1a | 312     | 316     | 33      | 1561 |
| DYF403S1a | 321     | 316     | 25      | 1634 |
| DYF403S1a | 342     | 334     | 36      | 1643 |
| DYF403S1a | 329     | 334     | 24      | 1704 |
| DYF403S1a | 312     | 316     | 26      | 1725 |
| DYF403S1a | 312     | 316     | 40      | 1785 |
| DYF403S1a | 312     | 316     | 31      | 1798 |
| DYF403S1a | 329     | 334     | 43      | 1818 |
| DYF403S1a | 346     | 342     | 27      | 1840 |
| DYF403S1a | 346     | 350     | 43      | 1883 |
| DYF403S1a | 329     | 334     | 57      | 1896 |
| DYF403S1a | 334     | 321     | 64      | 1912 |
| DYF403S1a | 346     | 342     | 50      | 1941 |
| DYF403S1a | 325,346 | 329,339 | 56      | 1947 |
| DYF403S1b | 50      | 49      | 40      | 28   |
| DYF403S1b | 46.1    | 45.1    | 32      | 115  |
| DYF403S1b | 50      | 49      | 33      | 137  |
| DYF403S1b | 49      | 47      | 17      | 175  |
| DYF403S1b | 51      | 50      | 53      | 453  |

|           |                                                          |                                                          |         |      |
|-----------|----------------------------------------------------------|----------------------------------------------------------|---------|------|
| DYF403S1b | 51                                                       | 50                                                       | 18      | 470  |
| DYF403S1b | 50                                                       | 49                                                       | 39      | 749  |
| DYF403S1b | 53                                                       | 52                                                       | 19      | 916  |
| DYF403S1b | 52                                                       | 53                                                       | 21      | 1090 |
| DYF403S1b | 50                                                       | 49                                                       | Unknown | 1288 |
| DYF403S1b | 52                                                       | 51                                                       | 25      | 1381 |
| DYF403S1b | 46.1                                                     | 47.1                                                     | 54      | 1447 |
| DYF403S1b | 49                                                       | 50                                                       | Unknown | 1479 |
| DYF403S1b | 48                                                       | 49                                                       | 23      | 1761 |
| DYF403S1b | 49                                                       | 48                                                       | 56      | 1947 |
| DYF403S1b | 46.1                                                     | 47.1                                                     | 54      | 1951 |
| DYF404S1  | (TTTC) <sub>15</sub> N <sub>42</sub> (TTTC) <sub>3</sub> | (TTTC) <sub>16</sub> N <sub>42</sub> (TTTC) <sub>3</sub> | 28      | 9    |
| DYF404S1  | (TTTC) <sub>15</sub> N <sub>42</sub> (TTTC) <sub>3</sub> | (TTTC) <sub>14</sub> N <sub>42</sub> (TTTC) <sub>3</sub> | 26      | 376  |
| DYF404S1  | (TTTC) <sub>16</sub> N <sub>42</sub> (TTTC) <sub>3</sub> | (TTTC) <sub>17</sub> N <sub>42</sub> (TTTC) <sub>3</sub> | 29      | 415  |
| DYF404S1  | (TTTC) <sub>16</sub> N <sub>42</sub> (TTTC) <sub>3</sub> | (TTTC) <sub>17</sub> N <sub>42</sub> (TTTC) <sub>3</sub> | 29      | 481  |
| DYF404S1  | (TTTC) <sub>16</sub> N <sub>42</sub> (TTTC) <sub>3</sub> | (TTTC) <sub>17</sub> N <sub>42</sub> (TTTC) <sub>3</sub> | 20      | 706  |
| DYF404S1  | (TTTC) <sub>15</sub> N <sub>42</sub> (TTTC) <sub>3</sub> | (TTTC) <sub>16</sub> N <sub>42</sub> (TTTC) <sub>3</sub> | 22      | 757  |
| DYF404S1  | (TTTC) <sub>15</sub> N <sub>42</sub> (TTTC) <sub>3</sub> | (TTTC) <sub>16</sub> N <sub>42</sub> (TTTC) <sub>3</sub> | 18      | 910  |
| DYF404S1  | (TTTC) <sub>16</sub> N <sub>42</sub> (TTTC) <sub>3</sub> | (TTTC) <sub>17</sub> N <sub>42</sub> (TTTC) <sub>3</sub> | 32      | 1007 |
| DYF404S1  | (TTTC) <sub>14</sub> N <sub>42</sub> (TTTC) <sub>3</sub> | (TTTC) <sub>15</sub> N <sub>42</sub> (TTTC) <sub>3</sub> | 23      | 1012 |
| DYF404S1  | (TTTC) <sub>15</sub> N <sub>42</sub> (TTTC) <sub>3</sub> | (TTTC) <sub>16</sub> N <sub>42</sub> (TTTC) <sub>3</sub> | 27      | 1049 |
| DYF404S1  | (TTTC) <sub>18</sub> N <sub>42</sub> (TTTC) <sub>3</sub> | (TTTC) <sub>17</sub> N <sub>42</sub> (TTTC) <sub>3</sub> | 31      | 1084 |
| DYF404S1  | (TTTC) <sub>14</sub> N <sub>42</sub> (TTTC) <sub>3</sub> | (TTTC) <sub>15</sub> N <sub>42</sub> (TTTC) <sub>3</sub> | 38      | 1114 |
| DYF404S1  | (TTTC) <sub>16</sub> N <sub>42</sub> (TTTC) <sub>3</sub> | (TTTC) <sub>15</sub> N <sub>42</sub> (TTTC) <sub>3</sub> | 21      | 1396 |
| DYF404S1  | (TTTC) <sub>16</sub> N <sub>42</sub> (TTTC) <sub>3</sub> | (TTTC) <sub>17</sub> N <sub>42</sub> (TTTC) <sub>3</sub> | 23      | 1546 |
| DYF404S1  | (TTTC) <sub>15</sub> N <sub>42</sub> (TTTC) <sub>3</sub> | (TTTC) <sub>14</sub> N <sub>42</sub> (TTTC) <sub>3</sub> | 40      | 1578 |
| DYF404S1  | (TTTC) <sub>17</sub> N <sub>42</sub> (TTTC) <sub>3</sub> | (TTTC) <sub>18</sub> N <sub>42</sub> (TTTC) <sub>3</sub> | 36      | 1655 |
| DYF404S1  | (TTTC) <sub>17</sub> N <sub>42</sub> (TTTC) <sub>3</sub> | (TTTC) <sub>16</sub> N <sub>42</sub> (TTTC) <sub>3</sub> | 26      | 1657 |
| DYF404S1  | (TTTC) <sub>16</sub> N <sub>42</sub> (TTTC) <sub>3</sub> | (TTTC) <sub>17</sub> N <sub>42</sub> (TTTC) <sub>3</sub> | 36      | 1687 |
| DYF404S1  | (TTTC) <sub>15</sub> N <sub>42</sub> (TTTC) <sub>3</sub> | (TTTC) <sub>14</sub> N <sub>42</sub> (TTTC) <sub>3</sub> | 19      | 1739 |

|          |                                                                                                                                                         |                                                                                                                                                         |         |      |
|----------|---------------------------------------------------------------------------------------------------------------------------------------------------------|---------------------------------------------------------------------------------------------------------------------------------------------------------|---------|------|
| DYF404S1 | (TTTC) <sub>18</sub> N <sub>42</sub> (TTTC) <sub>3</sub>                                                                                                | (TTTC) <sub>17</sub> N <sub>42</sub> (TTTC) <sub>3</sub>                                                                                                | 50      | 1881 |
| DYF404S1 | (TTTC) <sub>17</sub> N <sub>42</sub> (TTTC) <sub>3</sub>                                                                                                | (TTTC) <sub>18</sub> N <sub>42</sub> (TTTC) <sub>3</sub>                                                                                                | 60      | 1913 |
| DYF405S1 | (GGAA) <sub>11</sub> N <sub>115</sub> (GGAA) <sub>3</sub> (GAAA) <sub>1</sub> (GGAA) <sub>3</sub>                                                       | (GGAA) <sub>12</sub> N <sub>115</sub> (GGAA) <sub>3</sub> (GAAA) <sub>1</sub> (GGAA) <sub>3</sub>                                                       | 31      | 438  |
| DYF405S1 | (GGAA) <sub>14</sub> N <sub>115</sub> (GGAA) <sub>3</sub> (GAAA) <sub>1</sub> (GGAA) <sub>3</sub>                                                       | (GGAA) <sub>13</sub> N <sub>115</sub> (GGAA) <sub>3</sub> (GAAA) <sub>1</sub> (GGAA) <sub>3</sub>                                                       | 34      | 629  |
| DYF406S1 | (TATC) <sub>12</sub>                                                                                                                                    | (TATC) <sub>11</sub>                                                                                                                                    | 26      | 204  |
| DYF406S1 | (TATC) <sub>11</sub>                                                                                                                                    | (TATC) <sub>10</sub>                                                                                                                                    | 47      | 347  |
| DYF406S1 | (TATC) <sub>12</sub>                                                                                                                                    | (TATC) <sub>13</sub>                                                                                                                                    | 35      | 518  |
| DYF406S1 | (TATC) <sub>11</sub>                                                                                                                                    | (TATC) <sub>10</sub>                                                                                                                                    | 33      | 1011 |
| DYF406S1 | (TATC) <sub>12</sub>                                                                                                                                    | (TATC) <sub>13</sub>                                                                                                                                    | 41      | 1122 |
| DYF406S1 | (TATC) <sub>12</sub>                                                                                                                                    | (TATC) <sub>13</sub>                                                                                                                                    | Unknown | 1263 |
| DYF410S1 | (AAAT) <sub>9</sub>                                                                                                                                     | (AAAT) <sub>10</sub>                                                                                                                                    | Unknown | 1457 |
| DYF410S1 | (AAAT) <sub>9</sub>                                                                                                                                     | (AAAT) <sub>10</sub>                                                                                                                                    | 21      | 1667 |
| DYS19    | (TAGA) <sub>3</sub> (TAGG) <sub>1</sub> (TAGA) <sub>13</sub>                                                                                            | (TAGA) <sub>3</sub> (TAGG) <sub>1</sub> (TAGA) <sub>14</sub>                                                                                            | 46      | 21   |
| DYS19    | (TAGA) <sub>3</sub> (TAGG) <sub>1</sub> (TAGA) <sub>11</sub>                                                                                            | (TAGA) <sub>3</sub> (TAGG) <sub>1</sub> (TAGA) <sub>12</sub>                                                                                            | 43      | 472  |
| DYS19    | (TAGA) <sub>3</sub> (TAGG) <sub>1</sub> (TAGA) <sub>14</sub>                                                                                            | (TAGA) <sub>3</sub> (TAGG) <sub>1</sub> (TAGA) <sub>13</sub>                                                                                            | 24      | 726  |
| DYS19    | (TAGA) <sub>3</sub> (TAGG) <sub>1</sub> (TAGA) <sub>14</sub>                                                                                            | (TAGA) <sub>3</sub> (TAGG) <sub>1</sub> (TAGA) <sub>15</sub>                                                                                            | 31      | 927  |
| DYS19    | (TAGA) <sub>3</sub> (TAGG) <sub>1</sub> (TAGA) <sub>12</sub>                                                                                            | (TAGA) <sub>3</sub> (TAGG) <sub>1</sub> (TAGA) <sub>13</sub>                                                                                            | Unknown | 1224 |
| DYS19    | (TAGA) <sub>3</sub> (TAGG) <sub>1</sub> (TAGA) <sub>14</sub>                                                                                            | (TAGA) <sub>3</sub> (TAGG) <sub>1</sub> (TAGA) <sub>13</sub>                                                                                            | 29      | 1257 |
| DYS19    | (TAGA) <sub>3</sub> (TAGG) <sub>1</sub> (TAGA) <sub>14</sub>                                                                                            | (TAGA) <sub>3</sub> (TAGG) <sub>1</sub> (TAGA) <sub>13</sub>                                                                                            | 24      | 1767 |
| DYS385a  | (AAGG) <sub>4</sub> N <sub>14</sub> (AAAG) <sub>3</sub> N <sub>12</sub> (AAAG) <sub>3</sub> N <sub>29</sub><br>(AAGG) <sub>6</sub> (GAAA) <sub>13</sub> | (AAGG) <sub>4</sub> N <sub>14</sub> (AAAG) <sub>3</sub> N <sub>12</sub> (AAAG) <sub>3</sub> N <sub>29</sub><br>(AAGG) <sub>5</sub> (GAAA) <sub>13</sub> | 22      | 602  |
| DYS385a  | (AAGG) <sub>4</sub> N <sub>14</sub> (AAAG) <sub>3</sub> N <sub>12</sub> (AAAG) <sub>3</sub> N <sub>29</sub> (AAGG) <sub>6</sub><br>(GAAA) <sub>13</sub> | (AAGG) <sub>4</sub> N <sub>14</sub> (AAAG) <sub>3</sub> N <sub>12</sub> (AAAG) <sub>3</sub> N <sub>29</sub> (AAGG) <sub>6</sub><br>(GAAA) <sub>14</sub> | 30      | 1000 |
| DYS385a  | (AAGG) <sub>4</sub> N <sub>14</sub> (AAAG) <sub>3</sub> N <sub>12</sub> (AAAG) <sub>3</sub> N <sub>29</sub> (AAGG) <sub>6</sub><br>(GAAA) <sub>14</sub> | (AAGG) <sub>4</sub> N <sub>14</sub> (AAAG) <sub>3</sub> N <sub>12</sub> (AAAG) <sub>3</sub> N <sub>29</sub> (AAGG) <sub>6</sub><br>(GAAA) <sub>15</sub> | 60      | 1695 |
| DYS385b  | (AAGG) <sub>4</sub> N <sub>14</sub> (AAAG) <sub>3</sub> N <sub>12</sub> (AAAG) <sub>3</sub> N <sub>29</sub> (AAGG) <sub>6</sub><br>(GAAA) <sub>15</sub> | (AAGG) <sub>4</sub> N <sub>14</sub> (AAAG) <sub>3</sub> N <sub>12</sub> (AAAG) <sub>3</sub> N <sub>29</sub> (AAGG) <sub>6</sub><br>(GAAA) <sub>16</sub> | 39      | 501  |
| DYS385b  | (AAGG) <sub>4</sub> N <sub>14</sub> (AAAG) <sub>3</sub> N <sub>12</sub> (AAAG) <sub>3</sub> N <sub>29</sub> (AAGG) <sub>6</sub><br>(GAAA) <sub>15</sub> | (AAGG) <sub>4</sub> N <sub>14</sub> (AAAG) <sub>3</sub> N <sub>12</sub> (AAAG) <sub>3</sub> N <sub>29</sub> (AAGG) <sub>6</sub><br>(GAAA) <sub>16</sub> | 48      | 781  |
| DYS385b  | (AAGG) <sub>4</sub> N <sub>14</sub> (AAAG) <sub>3</sub> N <sub>12</sub> (AAAG) <sub>3</sub> N <sub>29</sub> (AAGG) <sub>6</sub><br>(GAAA) <sub>14</sub> | (AAGG) <sub>4</sub> N <sub>14</sub> (AAAG) <sub>3</sub> N <sub>12</sub> (AAAG) <sub>3</sub> N <sub>29</sub> (AAGG) <sub>6</sub><br>(GAAA) <sub>15</sub> | 24      | 835  |
| DYS385b  | (AAGG) <sub>4</sub> N <sub>14</sub> (AAAG) <sub>3</sub> N <sub>12</sub> (AAAG) <sub>3</sub> N <sub>29</sub> (AAGG) <sub>6</sub><br>(GAAA) <sub>14</sub> | (AAGG) <sub>4</sub> N <sub>14</sub> (AAAG) <sub>3</sub> N <sub>12</sub> (AAAG) <sub>3</sub> N <sub>29</sub> (AAGG) <sub>6</sub><br>(GAAA) <sub>15</sub> | 21      | 896  |

|          |                                                                                                                                                         |                                                                                                                                                         |         |      |
|----------|---------------------------------------------------------------------------------------------------------------------------------------------------------|---------------------------------------------------------------------------------------------------------------------------------------------------------|---------|------|
| DYS385b  | (AAGG) <sub>4</sub> N <sub>14</sub> (AAAG) <sub>3</sub> N <sub>12</sub> (AAAG) <sub>3</sub> N <sub>29</sub> (AAGG) <sub>6</sub><br>(GAAA) <sub>14</sub> | (AAGG) <sub>4</sub> N <sub>14</sub> (AAAG) <sub>3</sub> N <sub>12</sub> (AAAG) <sub>3</sub> N <sub>29</sub> (AAGG) <sub>6</sub><br>(GAAA) <sub>15</sub> | 23      | 1080 |
| DYS385b  | (AAGG) <sub>4</sub> N <sub>14</sub> (AAAG) <sub>3</sub> N <sub>12</sub> (AAAG) <sub>3</sub> N <sub>29</sub> (AAGG) <sub>6</sub><br>(GAAA) <sub>11</sub> | (AAGG) <sub>4</sub> N <sub>14</sub> (AAAG) <sub>3</sub> N <sub>12</sub> (AAAG) <sub>3</sub> N <sub>29</sub> (AAGG) <sub>6</sub><br>(GAAA) <sub>12</sub> | 52      | 1527 |
| DYS389I  | (TCTG) <sub>3</sub> (TCTA) <sub>12</sub>                                                                                                                | (TCTG) <sub>3</sub> (TCTA) <sub>11</sub>                                                                                                                | 32      | 12   |
| DYS389I  | (TCTG) <sub>3</sub> (TCTA) <sub>11</sub>                                                                                                                | (TCTG) <sub>3</sub> (TCTA) <sub>10</sub>                                                                                                                | 23      | 96   |
| DYS389I  | (TCTG) <sub>3</sub> (TCTA) <sub>10</sub>                                                                                                                | (TCTG) <sub>3</sub> (TCTA) <sub>11</sub>                                                                                                                | 23      | 207  |
| DYS389I  | (TCTG) <sub>3</sub> (TCTA) <sub>11</sub>                                                                                                                | (TCTG) <sub>3</sub> (TCTA) <sub>10</sub>                                                                                                                | 26      | 214  |
| DYS389I  | (TCTG) <sub>3</sub> (TCTA) <sub>9</sub>                                                                                                                 | (TCTG) <sub>3</sub> (TCTA) <sub>10</sub>                                                                                                                | 23      | 1119 |
| DYS389I  | (TCTG) <sub>3</sub> (TCTA) <sub>10</sub>                                                                                                                | (TCTG) <sub>3</sub> (TCTA) <sub>11</sub>                                                                                                                | Unknown | 1265 |
| DYS389I  | (TCTG) <sub>3</sub> (TCTA) <sub>10</sub>                                                                                                                | (TCTG) <sub>3</sub> (TCTA) <sub>9</sub>                                                                                                                 | 39      | 1700 |
| DYS389I  | (TCTG) <sub>3</sub> (TCTA) <sub>10</sub>                                                                                                                | (TCTG) <sub>3</sub> (TCTA) <sub>11</sub>                                                                                                                | 46      | 1946 |
| DYS389I  | (TCTG) <sub>3</sub> (TCTA) <sub>11</sub>                                                                                                                | (TCTG) <sub>3</sub> (TCTA) <sub>10</sub>                                                                                                                | 33      | 1966 |
| DYS389II | (TCTG) <sub>5</sub> (TCTA) <sub>12</sub> N <sub>28</sub> (TCTG) <sub>3</sub> (TCTA) <sub>10</sub>                                                       | (TCTG) <sub>5</sub> (TCTA) <sub>11</sub> N <sub>28</sub> (TCTG) <sub>3</sub> (TCTA) <sub>10</sub>                                                       | 32      | 401  |
| DYS389II | (TCTG) <sub>5</sub> (TCTA) <sub>14</sub> N <sub>28</sub> (TCTG) <sub>3</sub> (TCTA) <sub>11</sub>                                                       | (TCTG) <sub>5</sub> (TCTA) <sub>13</sub> N <sub>28</sub> (TCTG) <sub>3</sub> (TCTA) <sub>11</sub>                                                       | 36      | 519  |
| DYS389II | (TCTG) <sub>5</sub> (TCTA) <sub>13</sub> N <sub>28</sub> (TCTG) <sub>3</sub> (TCTA) <sub>11</sub>                                                       | (TCTG) <sub>5</sub> (TCTA) <sub>12</sub> N <sub>28</sub> (TCTG) <sub>3</sub> (TCTA) <sub>11</sub>                                                       | 21      | 721  |
| DYS389II | (TCTG) <sub>5</sub> (TCTA) <sub>12</sub> N <sub>28</sub> (TCTG) <sub>3</sub> (TCTA) <sub>10</sub>                                                       | (TCTG) <sub>5</sub> (TCTA) <sub>13</sub> N <sub>28</sub> (TCTG) <sub>3</sub> (TCTA) <sub>10</sub>                                                       | Unknown | 1221 |
| DYS389II | (TCTG) <sub>5</sub> (TCTA) <sub>12</sub> N <sub>28</sub> (TCTG) <sub>3</sub> (TCTA) <sub>9</sub>                                                        | (TCTG) <sub>5</sub> (TCTA) <sub>13</sub> N <sub>28</sub> (TCTG) <sub>3</sub> (TCTA) <sub>9</sub>                                                        | 24      | 1312 |
| DYS389II | (TCTG) <sub>5</sub> (TCTA) <sub>13</sub> N <sub>28</sub> (TCTG) <sub>3</sub> (TCTA) <sub>9</sub>                                                        | (TCTG) <sub>5</sub> (TCTA) <sub>12</sub> N <sub>28</sub> (TCTG) <sub>3</sub> (TCTA) <sub>9</sub>                                                        | 54      | 1942 |
| DYS390   | (TCTG) <sub>8</sub> (TCTA) <sub>12</sub> (TCTG) <sub>1</sub> (TCTG) <sub>4</sub>                                                                        | (TCTG) <sub>8</sub> (TCTA) <sub>11</sub> (TCTG) <sub>1</sub> (TCTG) <sub>4</sub>                                                                        | 30      | 975  |
| DYS390   | (TCTG) <sub>8</sub> (TCTA) <sub>12</sub> (TCTG) <sub>1</sub> (TCTG) <sub>4</sub>                                                                        | (TCTG) <sub>8</sub> (TCTA) <sub>11</sub> (TCTG) <sub>1</sub> (TCTG) <sub>4</sub>                                                                        | 24      | 1148 |
| DYS391   | (TCTG) <sub>3</sub> (TCTA) <sub>11</sub>                                                                                                                | (TCTG) <sub>3</sub> (TCTA) <sub>10</sub>                                                                                                                | 20      | 240  |
| DYS391   | (TCTG) <sub>3</sub> (TCTA) <sub>10</sub>                                                                                                                | (TCTG) <sub>3</sub> (TCTA) <sub>11</sub>                                                                                                                | 22      | 689  |
| DYS391   | (TCTG) <sub>3</sub> (TCTA) <sub>11</sub>                                                                                                                | (TCTG) <sub>3</sub> (TCTA) <sub>10</sub>                                                                                                                | 31      | 881  |
| DYS391   | (TCTG) <sub>3</sub> (TCTA) <sub>11</sub>                                                                                                                | (TCTG) <sub>3</sub> (TCTA) <sub>12</sub>                                                                                                                | 50      | 884  |
| DYS391   | (TCTG) <sub>3</sub> (TCTA) <sub>11</sub>                                                                                                                | (TCTG) <sub>3</sub> (TCTA) <sub>12</sub>                                                                                                                | 42      | 1411 |
| DYS392   | (TAT) <sub>13</sub>                                                                                                                                     | (TAT) <sub>14</sub>                                                                                                                                     | 60      | 1802 |
| DYS393   | (AGAT) <sub>14</sub>                                                                                                                                    | (AGAT) <sub>13</sub>                                                                                                                                    | 22      | 1028 |
| DYS393   | (AGAT) <sub>13</sub>                                                                                                                                    | (AGAT) <sub>14</sub>                                                                                                                                    | 42      | 1411 |
| DYS393   | (AGAT) <sub>14</sub>                                                                                                                                    | (AGAT) <sub>15</sub>                                                                                                                                    | 51      | 1852 |
| DYS425   | (TGT) <sub>13</sub>                                                                                                                                     | (TGT) <sub>12</sub>                                                                                                                                     | 31      | 1084 |

|        |                                                             |                                                              |         |      |
|--------|-------------------------------------------------------------|--------------------------------------------------------------|---------|------|
| DYS425 | (TGT) <sub>12</sub>                                         | (TGT) <sub>13</sub>                                          | 41      | 1476 |
| DYS435 | (TGGA) <sub>11</sub>                                        | (TGGA) <sub>10</sub>                                         | 19      | 916  |
| DYS437 | (TCTA) <sub>8</sub> (TCTG) <sub>2</sub> (TCTA) <sub>4</sub> | (TCTA) <sub>9</sub> (TCTG) <sub>2</sub> (TCTA) <sub>4</sub>  | 32      | 1025 |
| DYS437 | (TCTA) <sub>9</sub> (TCTG) <sub>2</sub> (TCTA) <sub>4</sub> | (TCTA) <sub>10</sub> (TCTG) <sub>2</sub> (TCTA) <sub>4</sub> | 53      | 1869 |
| DYS438 | (TTTTC) <sub>12</sub>                                       | (TTTTC) <sub>10</sub> , (TTTTC) <sub>12</sub>                | 46      | 23   |
| DYS439 | (GATA) <sub>3</sub> N <sub>32</sub> (GATA) <sub>10</sub>    | (GATA) <sub>3</sub> N <sub>32</sub> (GATA) <sub>11</sub>     | 24      | 516  |
| DYS439 | (GATA) <sub>3</sub> N <sub>32</sub> (GATA) <sub>13</sub>    | (GATA) <sub>3</sub> N <sub>32</sub> (GATA) <sub>14</sub>     | 36      | 617  |
| DYS439 | (GATA) <sub>3</sub> N <sub>32</sub> (GATA) <sub>13</sub>    | (GATA) <sub>3</sub> N <sub>32</sub> (GATA) <sub>12</sub>     | 23      | 620  |
| DYS439 | (GATA) <sub>3</sub> N <sub>32</sub> (GATA) <sub>13</sub>    | (GATA) <sub>3</sub> N <sub>32</sub> (GATA) <sub>12</sub>     | 40      | 1204 |
| DYS439 | (GATA) <sub>3</sub> N <sub>32</sub> (GATA) <sub>14</sub>    | (GATA) <sub>3</sub> N <sub>32</sub> (GATA) <sub>13</sub>     | 37      | 1211 |
| DYS439 | (GATA) <sub>3</sub> N <sub>32</sub> (GATA) <sub>13</sub>    | (GATA) <sub>3</sub> N <sub>32</sub> (GATA) <sub>12</sub>     | 21      | 1463 |
| DYS441 | (TTCC) <sub>14</sub>                                        | (TTCC) <sub>15</sub>                                         | 38      | 589  |
| DYS442 | (GATA) <sub>13</sub> (GACA) <sub>3</sub>                    | (GATA) <sub>12</sub> (GACA) <sub>3</sub>                     | 32      | 213  |
| DYS442 | (GATA) <sub>13</sub> (GACA) <sub>3</sub>                    | (GATA) <sub>12</sub> (GACA) <sub>3</sub>                     | 26      | 354  |
| DYS442 | (GATA) <sub>13</sub> (GACA) <sub>3</sub>                    | (GATA) <sub>12</sub> (GACA) <sub>3</sub>                     | 45      | 409  |
| DYS442 | (GATA) <sub>15</sub> (GACA) <sub>3</sub>                    | (GATA) <sub>14</sub> (GACA) <sub>3</sub>                     | 28      | 425  |
| DYS442 | (GATA) <sub>16</sub> (GACA) <sub>3</sub>                    | (GATA) <sub>15</sub> (GACA) <sub>3</sub>                     | 30      | 533  |
| DYS442 | (GATA) <sub>14</sub> (GACA) <sub>3</sub>                    | (GATA) <sub>13</sub> (GACA) <sub>3</sub>                     | 26      | 775  |
| DYS442 | (GATA) <sub>15</sub> (GACA) <sub>3</sub>                    | (GATA) <sub>14</sub> (GACA) <sub>3</sub>                     | 27      | 953  |
| DYS442 | (GATA) <sub>14</sub> (GACA) <sub>3</sub>                    | (GATA) <sub>15</sub> (GACA) <sub>3</sub>                     | 30      | 1181 |
| DYS442 | (GATA) <sub>13</sub> (GACA) <sub>3</sub>                    | (GATA) <sub>12</sub> (GACA) <sub>3</sub>                     | 16      | 1238 |
| DYS442 | (GATA) <sub>12</sub> (GACA) <sub>3</sub>                    | (GATA) <sub>11</sub> (GACA) <sub>3</sub>                     | 39      | 1239 |
| DYS442 | (GATA) <sub>14</sub> (GACA) <sub>3</sub>                    | (GATA) <sub>13</sub> (GACA) <sub>3</sub>                     | Unknown | 1245 |
| DYS442 | (GATA) <sub>12</sub> (GACA) <sub>3</sub>                    | (GATA) <sub>13</sub> (GACA) <sub>3</sub>                     | 28      | 1537 |
| DYS442 | (GATA) <sub>12</sub> (GACA) <sub>3</sub>                    | (GATA) <sub>11</sub> (GACA) <sub>3</sub>                     | 73      | 1884 |
| DYS442 | (GATA) <sub>13</sub> (GACA) <sub>3</sub>                    | (GATA) <sub>12</sub> (GACA) <sub>3</sub>                     | 51      | 1888 |
| DYS443 | (TTCC) <sub>15</sub> (CTT) <sub>3</sub>                     | (TTCC) <sub>14</sub> (CTT) <sub>3</sub>                      | 18      | 69   |
| DYS443 | (TTCC) <sub>14</sub> (CTT) <sub>3</sub>                     | (TTCC) <sub>15</sub> (CTT) <sub>3</sub>                      | 35      | 97   |
| DYS443 | (TTCC) <sub>14</sub> (CTT) <sub>3</sub>                     | (TTCC) <sub>15</sub> (CTT) <sub>3</sub>                      | 28      | 473  |
| DYS444 | (TAGA) <sub>12</sub>                                        | (TAGA) <sub>11</sub>                                         | 46      | 23   |

|        |                                                                                                           |                                                                                                          |    |      |
|--------|-----------------------------------------------------------------------------------------------------------|----------------------------------------------------------------------------------------------------------|----|------|
| DYS444 | (TAGA) <sub>13</sub>                                                                                      | (TAGA) <sub>12</sub>                                                                                     | 20 | 73   |
| DYS444 | (TAGA) <sub>13</sub>                                                                                      | (TAGA) <sub>12</sub>                                                                                     | 30 | 448  |
| DYS444 | (TAGA) <sub>14</sub>                                                                                      | (TAGA) <sub>15</sub>                                                                                     | 25 | 673  |
| DYS444 | (TAGA) <sub>15</sub>                                                                                      | (TAGA) <sub>14</sub>                                                                                     | 30 | 1067 |
| DYS444 | (TAGA) <sub>15</sub>                                                                                      | (TAGA) <sub>14</sub>                                                                                     | 22 | 1131 |
| DYS444 | (TAGA) <sub>15</sub>                                                                                      | (TAGA) <sub>14</sub>                                                                                     | 28 | 1294 |
| DYS444 | (TAGA) <sub>12</sub>                                                                                      | (TAGA) <sub>13</sub>                                                                                     | 33 | 1680 |
| DYS444 | (TAGA) <sub>13</sub>                                                                                      | (TAGA) <sub>12</sub>                                                                                     | 51 | 1813 |
| DYS445 | (TTTA) <sub>12</sub>                                                                                      | (TTTA) <sub>11</sub>                                                                                     | 57 | 464  |
| DYS445 | (TTTA) <sub>11</sub>                                                                                      | (TTTA) <sub>12</sub>                                                                                     | 22 | 886  |
| DYS445 | (TTTA) <sub>13</sub>                                                                                      | (TTTA) <sub>14</sub>                                                                                     | 21 | 1448 |
| DYS446 | (TCTCT) <sub>13</sub>                                                                                     | (TCTCT) <sub>14</sub>                                                                                    | 41 | 313  |
| DYS446 | (TCTCT) <sub>11</sub>                                                                                     | (TCTCT) <sub>10</sub>                                                                                    | 51 | 1442 |
| DYS446 | (TCTCT) <sub>12</sub>                                                                                     | (TCTCT) <sub>11</sub>                                                                                    | 55 | 1844 |
| DYS446 | (TCTCT) <sub>12</sub>                                                                                     | (TCTCT) <sub>13</sub>                                                                                    | 53 | 1893 |
| DYS447 | (TTATA) <sub>6</sub> (TTATT) <sub>1</sub> (TTATA) <sub>8</sub> (TTATT) <sub>1</sub> (TTATA) <sub>7</sub>  | (TTATA) <sub>6</sub> (TTATT) <sub>1</sub> (TTATA) <sub>9</sub> (TTATT) <sub>1</sub> (TTATA) <sub>7</sub> | 33 | 690  |
| DYS447 | (TTATA) <sub>7</sub> (TTATT) <sub>1</sub> (TTATA) <sub>10</sub> (TTATT) <sub>1</sub> (TTATA) <sub>7</sub> | (TTATA) <sub>7</sub> (TTATT) <sub>1</sub> (TTATA) <sub>9</sub> (TTATT) <sub>1</sub> (TTATA) <sub>7</sub> | 47 | 1302 |
| DYS447 | (TTATA) <sub>6</sub> (TTATT) <sub>1</sub> (TTATA) <sub>9</sub> (TTATT) <sub>1</sub> (TTATA) <sub>9</sub>  | (TTATA) <sub>6</sub> (TTATT) <sub>1</sub> (TTATA) <sub>9</sub> (TTATT) <sub>1</sub> (TTATA) <sub>8</sub> | 56 | 1677 |
| DYS449 | (TTCT) <sub>15</sub> N <sub>22</sub> (TTCT) <sub>3</sub> N <sub>12</sub> (TTCT) <sub>16</sub>             | (TTCT) <sub>15</sub> N <sub>22</sub> (TTCT) <sub>3</sub> N <sub>12</sub> (TTCT) <sub>15</sub>            | 29 | 78   |
| DYS449 | (TTCT) <sub>15</sub> N <sub>22</sub> (TTCT) <sub>3</sub> N <sub>12</sub> (TTCT) <sub>19</sub>             | (TTCT) <sub>14</sub> N <sub>22</sub> (TTCT) <sub>3</sub> N <sub>12</sub> (TTCT) <sub>19</sub>            | 27 | 170  |
| DYS449 | (TTCT) <sub>16</sub> N <sub>22</sub> (TTCT) <sub>3</sub> N <sub>12</sub> (TTCT) <sub>17</sub>             | (TTCT) <sub>17</sub> N <sub>22</sub> (TTCT) <sub>3</sub> N <sub>12</sub> (TTCT) <sub>17</sub>            | 23 | 251  |
| DYS449 | (TTCT) <sub>16</sub> N <sub>22</sub> (TTCT) <sub>3</sub> N <sub>12</sub> (TTCT) <sub>17</sub>             | (TTCT) <sub>15</sub> N <sub>22</sub> (TTCT) <sub>3</sub> N <sub>12</sub> (TTCT) <sub>17</sub>            | 38 | 449  |
| DYS449 | (TTCT) <sub>15</sub> N <sub>22</sub> (TTCT) <sub>3</sub> N <sub>12</sub> (TTCT) <sub>18</sub>             | (TTCT) <sub>15</sub> N <sub>22</sub> (TTCT) <sub>3</sub> N <sub>12</sub> (TTCT) <sub>19</sub>            | 39 | 492  |
| DYS449 | (TTCT) <sub>17</sub> N <sub>22</sub> (TTCT) <sub>3</sub> N <sub>12</sub> (TTCT) <sub>13</sub>             | (TTCT) <sub>17</sub> N <sub>22</sub> (TTCT) <sub>3</sub> N <sub>12</sub> (TTCT) <sub>14</sub>            | 35 | 531  |
| DYS449 | (TTCT) <sub>14</sub> N <sub>22</sub> (TTCT) <sub>3</sub> N <sub>12</sub> (TTCT) <sub>14</sub>             | (TTCT) <sub>14</sub> N <sub>22</sub> (TTCT) <sub>3</sub> N <sub>12</sub> (TTCT) <sub>15</sub>            | 34 | 568  |
| DYS449 | (TTCT) <sub>16</sub> N <sub>22</sub> (TTCT) <sub>3</sub> N <sub>12</sub> (TTCT) <sub>16</sub>             | (TTCT) <sub>16</sub> N <sub>22</sub> (TTCT) <sub>3</sub> N <sub>12</sub> (TTCT) <sub>17</sub>            | 21 | 786  |
| DYS449 | (TTCT) <sub>16</sub> N <sub>22</sub> (TTCT) <sub>3</sub> N <sub>12</sub> (TTCT) <sub>17</sub>             | (TTCT) <sub>16</sub> N <sub>22</sub> (TTCT) <sub>3</sub> N <sub>12</sub> (TTCT) <sub>18</sub>            | 25 | 840  |
| DYS449 | (TTCT) <sub>15</sub> N <sub>22</sub> (TTCT) <sub>3</sub> N <sub>12</sub> (TTCT) <sub>13</sub>             | (TTCT) <sub>16</sub> N <sub>22</sub> (TTCT) <sub>3</sub> N <sub>12</sub> (TTCT) <sub>13</sub>            | 22 | 894  |
| DYS449 | (TTCT) <sub>15</sub> N <sub>22</sub> (TTCT) <sub>3</sub> N <sub>12</sub> (TTCT) <sub>18</sub>             | (TTCT) <sub>15</sub> N <sub>22</sub> (TTCT) <sub>3</sub> N <sub>12</sub> (TTCT) <sub>17</sub>            | 37 | 904  |
| DYS449 | (TTCT) <sub>15</sub> N <sub>22</sub> (TTCT) <sub>3</sub> N <sub>12</sub> (TTCT) <sub>17</sub>             | (TTCT) <sub>15</sub> N <sub>22</sub> (TTCT) <sub>3</sub> N <sub>12</sub> (TTCT) <sub>16</sub>            | 33 | 966  |

|        |                                                                                                                                                                   |                                                                                                                                                                   |         |      |
|--------|-------------------------------------------------------------------------------------------------------------------------------------------------------------------|-------------------------------------------------------------------------------------------------------------------------------------------------------------------|---------|------|
| DYS449 | (TTCT) <sub>16</sub> N <sub>22</sub> (TTCT) <sub>3</sub> N <sub>12</sub> (TTCT) <sub>16</sub>                                                                     | (TTCT) <sub>15</sub> N <sub>22</sub> (TTCT) <sub>3</sub> N <sub>12</sub> (TTCT) <sub>16</sub>                                                                     | 24      | 1167 |
| DYS449 | (TTCT) <sub>15</sub> N <sub>22</sub> (TTCT) <sub>3</sub> N <sub>12</sub> (TTCT) <sub>14</sub>                                                                     | (TTCT) <sub>16</sub> N <sub>22</sub> (TTCT) <sub>3</sub> N <sub>12</sub> (TTCT) <sub>14</sub>                                                                     | 22      | 1349 |
| DYS449 | (TTCT) <sub>15</sub> N <sub>22</sub> (TTCT) <sub>3</sub> N <sub>12</sub> (TTCT) <sub>14</sub>                                                                     | (TTCT) <sub>16</sub> N <sub>22</sub> (TTCT) <sub>3</sub> N <sub>12</sub> (TTCT) <sub>14</sub>                                                                     | 45      | 1364 |
| DYS449 | (TTCT) <sub>18</sub> N <sub>22</sub> (TTCT) <sub>3</sub> N <sub>12</sub> (TTCT) <sub>16</sub>                                                                     | (TTCT) <sub>19</sub> N <sub>22</sub> (TTCT) <sub>3</sub> N <sub>12</sub> (TTCT) <sub>16</sub>                                                                     | 37      | 1418 |
| DYS449 | (TTCT) <sub>14</sub> N <sub>22</sub> (TTCT) <sub>3</sub> N <sub>12</sub> (TTCT) <sub>14</sub>                                                                     | (TTCT) <sub>14</sub> N <sub>22</sub> (TTCT) <sub>3</sub> N <sub>12</sub> (TTCT) <sub>15</sub>                                                                     | 21      | 1505 |
| DYS449 | (TTCT) <sub>15</sub> N <sub>22</sub> (TTCT) <sub>3</sub> N <sub>12</sub> (TTCT) <sub>15</sub>                                                                     | (TTCT) <sub>14</sub> N <sub>22</sub> (TTCT) <sub>3</sub> N <sub>12</sub> (TTCT) <sub>15</sub>                                                                     | 22      | 1526 |
| DYS449 | (TTCT) <sub>14</sub> N <sub>22</sub> (TTCT) <sub>3</sub> N <sub>12</sub> (TTCT) <sub>15</sub>                                                                     | (TTCT) <sub>14</sub> N <sub>22</sub> (TTCT) <sub>3</sub> N <sub>12</sub> (TTCT) <sub>16</sub>                                                                     | 54      | 1845 |
| DYS450 | (TTTTA) <sub>9</sub> N <sub>12</sub> (TTTTA) <sub>3</sub>                                                                                                         | (TTTTA) <sub>8</sub> N <sub>12</sub> (TTTTA) <sub>3</sub>                                                                                                         | 44      | 1619 |
| DYS452 | (TATAC) <sub>12</sub> [(CATAC) <sub>1</sub> (TATAC) <sub>1</sub> ] <sub>2</sub> N <sub>20</sub> (TATAC) <sub>3</sub><br>(CATAC) <sub>1</sub> (TATAC) <sub>3</sub> | (TATAC) <sub>13</sub> [(CATAC) <sub>1</sub> (TATAC) <sub>1</sub> ] <sub>2</sub> N <sub>20</sub> (TATAC) <sub>3</sub><br>(CATAC) <sub>1</sub> (TATAC) <sub>3</sub> | 17      | 967  |
| DYS452 | (TATAC) <sub>11</sub> [(CATAC) <sub>1</sub> (TATAC) <sub>1</sub> ] <sub>2</sub> N <sub>20</sub> (TATAC) <sub>3</sub><br>(CATAC) <sub>1</sub> (TATAC) <sub>3</sub> | (TATAC) <sub>12</sub> [(CATAC) <sub>1</sub> (TATAC) <sub>1</sub> ] <sub>2</sub> N <sub>20</sub> (TATAC) <sub>3</sub><br>(CATAC) <sub>1</sub> (TATAC) <sub>3</sub> | 26      | 971  |
| DYS452 | (TATAC) <sub>11</sub> [(CATAC) <sub>1</sub> (TATAC) <sub>1</sub> ] <sub>2</sub> N <sub>20</sub> (TATAC) <sub>3</sub><br>(CATAC) <sub>1</sub> (TATAC) <sub>3</sub> | (TATAC) <sub>10</sub> [(CATAC) <sub>1</sub> (TATAC) <sub>1</sub> ] <sub>2</sub> N <sub>20</sub> (TATAC) <sub>3</sub><br>(CATAC) <sub>1</sub> (TATAC) <sub>3</sub> | 33      | 1046 |
| DYS452 | (TATAC) <sub>10</sub> [(CATAC) <sub>1</sub> (TATAC) <sub>1</sub> ] <sub>2</sub> N <sub>20</sub> (TATAC) <sub>3</sub><br>(CATAC) <sub>1</sub> (TATAC) <sub>3</sub> | (TATAC) <sub>9</sub> [(CATAC) <sub>1</sub> (TATAC) <sub>1</sub> ] <sub>2</sub> N <sub>20</sub> (TATAC) <sub>3</sub><br>(CATAC) <sub>1</sub> (TATAC) <sub>3</sub>  | 41      | 1453 |
| DYS452 | (TATAC) <sub>8</sub> [(CATAC) <sub>1</sub> (TATAC) <sub>1</sub> ] <sub>4</sub> N <sub>20</sub> (TATAC) <sub>3</sub><br>(CATAC) <sub>1</sub> (TATAC) <sub>3</sub>  | (TATAC) <sub>8</sub> [(CATAC) <sub>1</sub> (TATAC) <sub>1</sub> ] <sub>3</sub> N <sub>20</sub> (TATAC) <sub>3</sub><br>(CATAC) <sub>1</sub> (TATAC) <sub>3</sub>  | 55      | 1858 |
| DYS456 | (AGAT) <sub>15</sub>                                                                                                                                              | (AGAT) <sub>16</sub>                                                                                                                                              | 34      | 308  |
| DYS456 | (AGAT) <sub>16</sub>                                                                                                                                              | (AGAT) <sub>17</sub>                                                                                                                                              | 32      | 401  |
| DYS456 | (AGAT) <sub>15</sub>                                                                                                                                              | (AGAT) <sub>16</sub>                                                                                                                                              | 28      | 525  |
| DYS456 | (AGAT) <sub>16</sub>                                                                                                                                              | (AGAT) <sub>17</sub>                                                                                                                                              | 24      | 560  |
| DYS456 | (AGAT) <sub>15</sub>                                                                                                                                              | (AGAT) <sub>16</sub>                                                                                                                                              | 36      | 830  |
| DYS456 | (AGAT) <sub>17</sub>                                                                                                                                              | (AGAT) <sub>16</sub>                                                                                                                                              | 20      | 1037 |
| DYS456 | (AGAT) <sub>17</sub>                                                                                                                                              | (AGAT) <sub>16</sub>                                                                                                                                              | Unknown | 1333 |
| DYS456 | (AGAT) <sub>16</sub>                                                                                                                                              | (AGAT) <sub>17</sub>                                                                                                                                              | 29      | 1790 |
| DYS458 | (GAAA) <sub>18</sub>                                                                                                                                              | (GAAA) <sub>17</sub>                                                                                                                                              | 25      | 307  |
| DYS458 | (GAAA) <sub>18</sub>                                                                                                                                              | (GAAA) <sub>19</sub>                                                                                                                                              | 41      | 313  |
| DYS458 | (GAAA) <sub>17</sub>                                                                                                                                              | (GAAA) <sub>18</sub>                                                                                                                                              | 28      | 466  |
| DYS458 | (GAAA) <sub>17</sub>                                                                                                                                              | (GAAA) <sub>18</sub>                                                                                                                                              | 27      | 734  |
| DYS458 | (GAAA) <sub>16</sub>                                                                                                                                              | (GAAA) <sub>15</sub>                                                                                                                                              | 24      | 771  |
| DYS458 | (GAAA) <sub>17</sub>                                                                                                                                              | (GAAA) <sub>18</sub>                                                                                                                                              | 29      | 826  |

|        |                                                                                             |                                                                                             |         |      |
|--------|---------------------------------------------------------------------------------------------|---------------------------------------------------------------------------------------------|---------|------|
| DYS458 | (GAAA) <sub>15</sub>                                                                        | (GAAA) <sub>16</sub>                                                                        | Unknown | 1063 |
| DYS458 | (GAAA) <sub>16</sub>                                                                        | (GAAA) <sub>15</sub>                                                                        | 19      | 1132 |
| DYS458 | (GAAA) <sub>17</sub>                                                                        | (GAAA) <sub>16</sub>                                                                        | 34      | 1428 |
| DYS458 | (GAAA) <sub>16</sub>                                                                        | (GAAA) <sub>17</sub>                                                                        | 37      | 1454 |
| DYS458 | (GAAA) <sub>17</sub>                                                                        | (GAAA) <sub>16</sub>                                                                        | 19      | 1508 |
| DYS458 | (GAAA) <sub>17</sub>                                                                        | (GAAA) <sub>16</sub>                                                                        | Unknown | 1613 |
| DYS458 | (GAAA) <sub>18</sub>                                                                        | (GAAA) <sub>17</sub>                                                                        | 64      | 1912 |
| DYS458 | (GAAA) <sub>18</sub>                                                                        | (GAAA) <sub>19</sub>                                                                        | 65      | 1920 |
| DYS459 | (ATTT) <sub>10</sub>                                                                        | (ATTT) <sub>9</sub>                                                                         | 29      | 246  |
| DYS459 | (ATTT) <sub>9</sub>                                                                         | (ATTT) <sub>10</sub>                                                                        | 26      | 573  |
| DYS459 | (ATTT) <sub>10</sub>                                                                        | (ATTT) <sub>9</sub>                                                                         | 43      | 928  |
| DYS459 | (ATTT) <sub>10</sub>                                                                        | (ATTT) <sub>11</sub>                                                                        | 27      | 1195 |
| DYS460 | (TAGA) <sub>13</sub>                                                                        | (TAGA) <sub>12</sub>                                                                        | 27      | 41   |
| DYS460 | (TAGA) <sub>9</sub>                                                                         | (TAGA) <sub>10</sub>                                                                        | 29      | 481  |
| DYS460 | (TAGA) <sub>11</sub>                                                                        | (TAGA) <sub>10</sub>                                                                        | 35      | 522  |
| DYS460 | (TAGA) <sub>12</sub>                                                                        | (TAGA) <sub>11</sub>                                                                        | 24      | 560  |
| DYS460 | (TAGA) <sub>11</sub>                                                                        | (TAGA) <sub>10</sub>                                                                        | 27      | 777  |
| DYS460 | (TAGA) <sub>11</sub>                                                                        | (TAGA) <sub>10</sub>                                                                        | 30      | 1062 |
| DYS460 | (TAGA) <sub>12</sub>                                                                        | (TAGA) <sub>11</sub>                                                                        | 33      | 1112 |
| DYS460 | (TAGA) <sub>11</sub>                                                                        | (TAGA) <sub>10</sub>                                                                        | 29      | 1601 |
| DYS460 | (TAGA) <sub>10</sub>                                                                        | (TAGA) <sub>11</sub>                                                                        | 21      | 1728 |
| DYS460 | (TAGA) <sub>13</sub>                                                                        | (TAGA) <sub>12</sub>                                                                        | 28      | 1734 |
| DYS461 | (TAGA) <sub>11</sub>                                                                        | (TAGA) <sub>10</sub>                                                                        | 23      | 1676 |
| DYS462 | (CATA) <sub>11</sub>                                                                        | (CATA) <sub>10</sub>                                                                        | 18      | 692  |
| DYS462 | (CATA) <sub>13</sub>                                                                        | (CATA) <sub>12</sub>                                                                        | 30      | 1425 |
| DYS462 | (CATA) <sub>11</sub>                                                                        | (CATA) <sub>10</sub>                                                                        | 39      | 1502 |
| DYS462 | (CATA) <sub>11</sub>                                                                        | (CATA) <sub>12</sub>                                                                        | 64      | 1912 |
| DYS463 | (AAAGG) <sub>6</sub> (AAGGG) <sub>15</sub>                                                  | (AAAGG) <sub>6</sub> (AAGGG) <sub>16</sub>                                                  | 36      | 327  |
| DYS463 | (AAAGG) <sub>6</sub> (AAGGG) <sub>13</sub>                                                  | (AAAGG) <sub>6</sub> (AAGGG) <sub>14</sub>                                                  | 54      | 1447 |
| DYS464 | (CCTT) <sub>16</sub> N <sub>46</sub> (CCTT) <sub>3</sub> N <sub>8</sub> (CCTT) <sub>4</sub> | (CCTT) <sub>17</sub> N <sub>46</sub> (CCTT) <sub>3</sub> N <sub>8</sub> (CCTT) <sub>4</sub> | 25      | 4    |

|        |                                                                                                                                                                                                                                                                                                                                                                               |                                                                                                                                                                                                                                                                                                                                                                               |    |      |
|--------|-------------------------------------------------------------------------------------------------------------------------------------------------------------------------------------------------------------------------------------------------------------------------------------------------------------------------------------------------------------------------------|-------------------------------------------------------------------------------------------------------------------------------------------------------------------------------------------------------------------------------------------------------------------------------------------------------------------------------------------------------------------------------|----|------|
| DYS464 | (CCTT) <sub>15</sub> N <sub>46</sub> (CCTT) <sub>3</sub> N <sub>8</sub> (CCTT) <sub>4</sub>                                                                                                                                                                                                                                                                                   | (CCTT) <sub>14</sub> N <sub>46</sub> (CCTT) <sub>3</sub> N <sub>8</sub> (CCTT) <sub>4</sub>                                                                                                                                                                                                                                                                                   | 18 | 470  |
| DYS464 | (CCTT) <sub>17</sub> N <sub>46</sub> (CCTT) <sub>3</sub> N <sub>8</sub> (CCTT) <sub>4</sub>                                                                                                                                                                                                                                                                                   | (CCTT) <sub>16</sub> N <sub>46</sub> (CCTT) <sub>3</sub> N <sub>8</sub> (CCTT) <sub>4</sub>                                                                                                                                                                                                                                                                                   | 25 | 512  |
| DYS464 | (CCTT) <sub>16</sub> N <sub>46</sub> (CCTT) <sub>3</sub> N <sub>8</sub> (CCTT) <sub>4</sub>                                                                                                                                                                                                                                                                                   | (CCTT) <sub>19</sub> N <sub>46</sub> (CCTT) <sub>3</sub> N <sub>8</sub> (CCTT) <sub>4</sub>                                                                                                                                                                                                                                                                                   | 53 | 760  |
| DYS464 | (CCTT) <sub>13</sub> N <sub>46</sub> (CCTT) <sub>3</sub> N <sub>8</sub> (CCTT) <sub>4</sub>                                                                                                                                                                                                                                                                                   | (CCTT) <sub>14</sub> N <sub>46</sub> (CCTT) <sub>3</sub> N <sub>8</sub> (CCTT) <sub>4</sub>                                                                                                                                                                                                                                                                                   | 18 | 847  |
| DYS464 | (CCTT) <sub>18</sub> N <sub>46</sub> (CCTT) <sub>3</sub> N <sub>8</sub> (CCTT) <sub>4</sub>                                                                                                                                                                                                                                                                                   | (CCTT) <sub>16</sub> N <sub>46</sub> (CCTT) <sub>3</sub> N <sub>8</sub> (CCTT) <sub>4</sub>                                                                                                                                                                                                                                                                                   | 19 | 900  |
| DYS464 | (CCTT) <sub>16</sub> N <sub>46</sub> (CCTT) <sub>3</sub> N <sub>8</sub> (CCTT) <sub>4</sub>                                                                                                                                                                                                                                                                                   | (CCTT) <sub>15</sub> N <sub>46</sub> (CCTT) <sub>3</sub> N <sub>8</sub> (CCTT) <sub>4</sub>                                                                                                                                                                                                                                                                                   | 20 | 1185 |
| DYS464 | (CCTT) <sub>17</sub> N <sub>46</sub> (CCTT) <sub>3</sub> N <sub>8</sub> (CCTT) <sub>4</sub>                                                                                                                                                                                                                                                                                   | (CCTT) <sub>16</sub> N <sub>46</sub> (CCTT) <sub>3</sub> N <sub>8</sub> (CCTT) <sub>4</sub>                                                                                                                                                                                                                                                                                   | 31 | 1339 |
| DYS464 | (CCTT) <sub>15</sub> N <sub>46</sub> (CCTT) <sub>3</sub> N <sub>8</sub> (CCTT) <sub>4</sub>                                                                                                                                                                                                                                                                                   | (CCTT) <sub>16</sub> N <sub>46</sub> (CCTT) <sub>3</sub> N <sub>8</sub> (CCTT) <sub>4</sub>                                                                                                                                                                                                                                                                                   | 22 | 1526 |
| DYS464 | (CCTT) <sub>18</sub> N <sub>46</sub> (CCTT) <sub>3</sub> N <sub>8</sub> (CCTT) <sub>4</sub>                                                                                                                                                                                                                                                                                   | (CCTT) <sub>19</sub> N <sub>46</sub> (CCTT) <sub>3</sub> N <sub>8</sub> (CCTT) <sub>4</sub>                                                                                                                                                                                                                                                                                   | 43 | 1540 |
| DYS464 | (CCTT) <sub>17</sub> N <sub>46</sub> (CCTT) <sub>3</sub> N <sub>8</sub> (CCTT) <sub>4</sub>                                                                                                                                                                                                                                                                                   | (CCTT) <sub>16</sub> N <sub>46</sub> (CCTT) <sub>3</sub> N <sub>8</sub> (CCTT) <sub>4</sub>                                                                                                                                                                                                                                                                                   | 19 | 1784 |
| DYS464 | (CCTT) <sub>18</sub> N <sub>46</sub> (CCTT) <sub>3</sub> N <sub>8</sub> (CCTT) <sub>4</sub>                                                                                                                                                                                                                                                                                   | (CCTT) <sub>17</sub> N <sub>46</sub> (CCTT) <sub>3</sub> N <sub>8</sub> (CCTT) <sub>4</sub>                                                                                                                                                                                                                                                                                   | 56 | 1892 |
| DYS468 | (CTG) <sub>4</sub> N <sub>44</sub> (CCT) <sub>3</sub> N <sub>40</sub> (CTT) <sub>3</sub> N <sub>35</sub> (CCT) <sub>4</sub> N <sub>8</sub><br>(CTC) <sub>4</sub> (CTT) <sub>8</sub> (ATTCAT) <sub>8</sub>                                                                                                                                                                     | (CTG) <sub>4</sub> N <sub>44</sub> (CCT) <sub>3</sub> N <sub>40</sub> (CTT) <sub>3</sub> N <sub>35</sub> (CCT) <sub>4</sub> N <sub>8</sub><br>(CTC) <sub>4</sub> (CTT) <sub>9</sub> (ATTCAT) <sub>8</sub>                                                                                                                                                                     | 29 | 1743 |
| DYS468 | (CTG) <sub>4</sub> N <sub>44</sub> (CCT) <sub>3</sub> N <sub>40</sub> (CTT) <sub>3</sub> N <sub>35</sub> (CCT) <sub>4</sub> N <sub>8</sub><br>(CTC) <sub>4</sub> (CTT) <sub>9</sub> (ATTCAT) <sub>9</sub>                                                                                                                                                                     | (CTG) <sub>4</sub> N <sub>44</sub> (CCT) <sub>3</sub> N <sub>40</sub> (CTT) <sub>3</sub> N <sub>35</sub> (CCT) <sub>4</sub> N <sub>8</sub><br>(CTC) <sub>4</sub> (CTT) <sub>9</sub> (ATTCAT) <sub>8</sub>                                                                                                                                                                     | 60 | 1802 |
| DYS469 | (CTT) <sub>3</sub> N <sub>39</sub> (CTT) <sub>4</sub> (GTT) <sub>1</sub> (CTT) <sub>20</sub> T(CTT) <sub>3</sub> N <sub>17</sub><br>(CTT) <sub>5</sub> N <sub>37</sub> (CTT) <sub>3</sub> N <sub>12</sub> (CTT) <sub>4</sub> N <sub>12</sub> (CTT) <sub>3</sub> N <sub>12</sub><br>(CTT) <sub>5</sub> (CCT) <sub>4</sub> N <sub>9</sub> (CTT) <sub>3</sub> (CCT) <sub>3</sub> | (CTT) <sub>3</sub> N <sub>39</sub> (CTT) <sub>4</sub> (GTT) <sub>1</sub> (CTT) <sub>21</sub> T(CTT) <sub>3</sub> N <sub>17</sub> (CTT) <sub>5</sub> N <sub>37</sub><br>(CTT) <sub>3</sub> N <sub>12</sub> (CTT) <sub>4</sub> N <sub>12</sub> (CTT) <sub>3</sub> N <sub>12</sub><br>(CTT) <sub>5</sub> (CCT) <sub>4</sub> N <sub>9</sub> (CTT) <sub>3</sub> (CCT) <sub>3</sub> | 24 | 107  |
| DYS469 | (CTT) <sub>3</sub> N <sub>39</sub> (CTT) <sub>4</sub> (GTT) <sub>1</sub> (CTT) <sub>15</sub> T(CTT) <sub>3</sub> N <sub>17</sub><br>(CTT) <sub>5</sub> N <sub>37</sub> (CTT) <sub>3</sub> N <sub>12</sub> (CTT) <sub>4</sub> N <sub>12</sub> (CTT) <sub>3</sub> N <sub>12</sub><br>(CTT) <sub>5</sub> (CCT) <sub>4</sub> N <sub>9</sub> (CTT) <sub>3</sub> (CCT) <sub>3</sub> | (CTT) <sub>3</sub> N <sub>39</sub> (CTT) <sub>4</sub> (GTT) <sub>1</sub> (CTT) <sub>16</sub> T(CTT) <sub>3</sub> N <sub>17</sub><br>(CTT) <sub>5</sub> N <sub>37</sub> (CTT) <sub>3</sub> N <sub>12</sub> (CTT) <sub>4</sub> N <sub>12</sub> (CTT) <sub>3</sub> N <sub>12</sub><br>(CTT) <sub>5</sub> (CCT) <sub>4</sub> N <sub>9</sub> (CTT) <sub>3</sub> (CCT) <sub>3</sub> | 21 | 769  |
| DYS469 | (CTT) <sub>3</sub> N <sub>39</sub> (CTT) <sub>4</sub> (GTT) <sub>1</sub> (CTT) <sub>15</sub> T(CTT) <sub>3</sub> N <sub>17</sub><br>(CTT) <sub>5</sub> N <sub>37</sub> (CTT) <sub>3</sub> N <sub>12</sub> (CTT) <sub>4</sub> N <sub>12</sub> (CTT) <sub>3</sub> N <sub>12</sub><br>(CTT) <sub>5</sub> (CCT) <sub>4</sub> N <sub>9</sub> (CTT) <sub>3</sub> (CCT) <sub>3</sub> | (CTT) <sub>3</sub> N <sub>39</sub> (CTT) <sub>4</sub> (GTT) <sub>1</sub> (CTT) <sub>16</sub> T(CTT) <sub>3</sub> N <sub>17</sub><br>(CTT) <sub>5</sub> N <sub>37</sub> (CTT) <sub>3</sub> N <sub>12</sub> (CTT) <sub>4</sub> N <sub>12</sub> (CTT) <sub>3</sub> N <sub>12</sub><br>(CTT) <sub>5</sub> (CCT) <sub>4</sub> N <sub>9</sub> (CTT) <sub>3</sub> (CCT) <sub>3</sub> | 29 | 1491 |
| DYS469 | (CTT) <sub>3</sub> N <sub>39</sub> (CTT) <sub>4</sub> (GTT) <sub>1</sub> (CTT) <sub>16</sub> T(CTT) <sub>3</sub> N <sub>17</sub><br>(CTT) <sub>5</sub> N <sub>37</sub> (CTT) <sub>3</sub> N <sub>12</sub> (CTT) <sub>4</sub> N <sub>12</sub> (CTT) <sub>3</sub> N <sub>12</sub><br>(CTT) <sub>5</sub> (CCT) <sub>4</sub> N <sub>9</sub> (CTT) <sub>3</sub> (CCT) <sub>3</sub> | (CTT) <sub>3</sub> N <sub>39</sub> (CTT) <sub>4</sub> (GTT) <sub>1</sub> (CTT) <sub>15</sub> T(CTT) <sub>3</sub> N <sub>17</sub><br>(CTT) <sub>5</sub> N <sub>37</sub> (CTT) <sub>3</sub> N <sub>12</sub> (CTT) <sub>4</sub> N <sub>12</sub> (CTT) <sub>3</sub> N <sub>12</sub><br>(CTT) <sub>5</sub> (CCT) <sub>4</sub> N <sub>9</sub> (CTT) <sub>3</sub> (CCT) <sub>3</sub> | 29 | 1693 |
| DYS476 | (TGA) <sub>11</sub>                                                                                                                                                                                                                                                                                                                                                           | (TGA) <sub>12</sub>                                                                                                                                                                                                                                                                                                                                                           | 59 | 1867 |
| DYS481 | (CTT) <sub>28</sub>                                                                                                                                                                                                                                                                                                                                                           | (CTT) <sub>29</sub>                                                                                                                                                                                                                                                                                                                                                           | 30 | 99   |
| DYS481 | (CTT) <sub>22</sub>                                                                                                                                                                                                                                                                                                                                                           | (CTT) <sub>23</sub>                                                                                                                                                                                                                                                                                                                                                           | 32 | 655  |
| DYS481 | (CTT) <sub>30</sub>                                                                                                                                                                                                                                                                                                                                                           | (CTT) <sub>29</sub>                                                                                                                                                                                                                                                                                                                                                           | 24 | 778  |
| DYS481 | (CTT) <sub>32</sub>                                                                                                                                                                                                                                                                                                                                                           | (CTT) <sub>31</sub>                                                                                                                                                                                                                                                                                                                                                           | 17 | 845  |
| DYS481 | (CTT) <sub>31</sub>                                                                                                                                                                                                                                                                                                                                                           | (CTT) <sub>30</sub>                                                                                                                                                                                                                                                                                                                                                           | 24 | 1370 |
| DYS481 | (CTT) <sub>23</sub>                                                                                                                                                                                                                                                                                                                                                           | (CTT) <sub>21</sub>                                                                                                                                                                                                                                                                                                                                                           | 42 | 1411 |

|        |                                                                                                                                 |                                                                                                                                 |         |      |
|--------|---------------------------------------------------------------------------------------------------------------------------------|---------------------------------------------------------------------------------------------------------------------------------|---------|------|
| DYS481 | (CTT) <sub>25</sub>                                                                                                             | (CTT) <sub>24</sub>                                                                                                             | 36      | 1672 |
| DYS481 | (CTT) <sub>22</sub>                                                                                                             | (CTT) <sub>23</sub>                                                                                                             | 54      | 1895 |
| DYS484 | (AAT) <sub>13</sub> N <sub>12</sub> (AAT) <sub>3</sub> (TAT) <sub>3</sub>                                                       | (AAT) <sub>11</sub> N <sub>12</sub> (AAT) <sub>3</sub> (TAT) <sub>3</sub>                                                       | 22      | 45   |
| DYS484 | (AAT) <sub>13</sub> N <sub>12</sub> (AAT) <sub>3</sub> (TAT) <sub>3</sub>                                                       | (AAT) <sub>14</sub> N <sub>12</sub> (AAT) <sub>3</sub> (TAT) <sub>3</sub>                                                       | 35      | 875  |
| DYS484 | (AAT) <sub>12</sub> N <sub>12</sub> (AAT) <sub>3</sub> (TAT) <sub>3</sub>                                                       | (AAT) <sub>13</sub> N <sub>12</sub> (AAT) <sub>3</sub> (TAT) <sub>3</sub>                                                       | 25      | 1213 |
| DYS484 | (AAT) <sub>12</sub> N <sub>12</sub> (AAT) <sub>3</sub> (TAT) <sub>3</sub>                                                       | (AAT) <sub>10</sub> N <sub>12</sub> (AAT) <sub>3</sub> (TAT) <sub>3</sub>                                                       | 26      | 1653 |
| DYS487 | (AAT) <sub>13</sub>                                                                                                             | (AAT) <sub>14</sub>                                                                                                             | 21      | 172  |
| DYS487 | (AAT) <sub>14</sub>                                                                                                             | (AAT) <sub>13</sub>                                                                                                             | 28      | 1410 |
| DYS495 | (AAT) <sub>15</sub>                                                                                                             | (AAT) <sub>16</sub>                                                                                                             | 26      | 775  |
| DYS495 | (AAT) <sub>15</sub>                                                                                                             | (AAT) <sub>16</sub>                                                                                                             | 30      | 1274 |
| DYS495 | (AAT) <sub>17</sub>                                                                                                             | (AAT) <sub>16</sub>                                                                                                             | 31      | 1596 |
| DYS497 | (TTA) <sub>15</sub>                                                                                                             | (TTA) <sub>14</sub>                                                                                                             | 25      | 58   |
| DYS497 | (TTA) <sub>15</sub>                                                                                                             | (TTA) <sub>16</sub>                                                                                                             | 40      | 305  |
| DYS504 | (CCTT) <sub>17</sub> N <sub>7</sub> (CCCT) <sub>3</sub>                                                                         | (CCTT) <sub>16</sub> N <sub>7</sub> (CCCT) <sub>3</sub>                                                                         | 25      | 275  |
| DYS504 | (CCTT) <sub>19</sub> N <sub>7</sub> (CCCT) <sub>3</sub>                                                                         | (CCTT) <sub>18</sub> N <sub>7</sub> (CCCT) <sub>3</sub>                                                                         | Unknown | 1223 |
| DYS504 | (CCTT) <sub>17</sub> N <sub>7</sub> (CCCT) <sub>3</sub>                                                                         | (CCTT) <sub>18</sub> N <sub>7</sub> (CCCT) <sub>3</sub>                                                                         | 39      | 1502 |
| DYS504 | (CCTT) <sub>18</sub> N <sub>7</sub> (CCCT) <sub>3</sub>                                                                         | (CCTT) <sub>17</sub> N <sub>7</sub> (CCCT) <sub>3</sub>                                                                         | 30      | 1796 |
| DYS504 | (CCTT) <sub>18</sub> N <sub>7</sub> (CCCT) <sub>3</sub>                                                                         | (CCTT) <sub>17</sub> N <sub>7</sub> (CCCT) <sub>3</sub>                                                                         | 54      | 1895 |
| DYS505 | (TCCT) <sub>13</sub>                                                                                                            | (TCCT) <sub>12</sub>                                                                                                            | 64      | 951  |
| DYS505 | (TCCT) <sub>12</sub>                                                                                                            | (TCCT) <sub>13</sub>                                                                                                            | 25      | 1070 |
| DYS508 | (TATC) <sub>10</sub>                                                                                                            | (TATC) <sub>11</sub>                                                                                                            | 32      | 1369 |
| DYS508 | (TATC) <sub>11</sub>                                                                                                            | (TATC) <sub>12</sub>                                                                                                            | 21      | 1635 |
| DYS508 | (TATC) <sub>11</sub>                                                                                                            | (TATC) <sub>10</sub>                                                                                                            | 20      | 1862 |
| DYS508 | (TATC) <sub>14</sub>                                                                                                            | (TATC) <sub>13</sub>                                                                                                            | 67      | 1954 |
| DYS509 | (AAAT) <sub>10</sub> (AATAA) <sub>1</sub> (AAAT) <sub>3</sub>                                                                   | (AAAT) <sub>9</sub> (AATAA) <sub>1</sub> (AAAT) <sub>3</sub>                                                                    | 18      | 680  |
| DYS510 | (GATA) <sub>3</sub> N <sub>12</sub> (GATA) <sub>12</sub> N <sub>13</sub> (GGAT) <sub>4</sub> N <sub>9</sub> (GATA) <sub>3</sub> | (GATA) <sub>3</sub> N <sub>12</sub> (GATA) <sub>13</sub> N <sub>13</sub> (GGAT) <sub>4</sub> N <sub>9</sub> (GATA) <sub>3</sub> | 24      | 17   |
| DYS510 | (GATA) <sub>3</sub> N <sub>12</sub> (GATA) <sub>12</sub> N <sub>13</sub> (GGAT) <sub>4</sub> N <sub>9</sub> (GATA) <sub>3</sub> | (GATA) <sub>3</sub> N <sub>12</sub> (GATA) <sub>11</sub> N <sub>13</sub> (GGAT) <sub>4</sub> N <sub>9</sub> (GATA) <sub>3</sub> | 64      | 166  |
| DYS510 | (GATA) <sub>3</sub> N <sub>12</sub> (GATA) <sub>12</sub> N <sub>13</sub> (GGAT) <sub>4</sub> N <sub>9</sub> (GATA) <sub>3</sub> | (GATA) <sub>3</sub> N <sub>12</sub> (GATA) <sub>11</sub> N <sub>13</sub> (GGAT) <sub>4</sub> N <sub>9</sub> (GATA) <sub>3</sub> | 25      | 185  |
| DYS510 | (GATA) <sub>3</sub> N <sub>12</sub> (GATA) <sub>15</sub> N <sub>13</sub> (GGAT) <sub>4</sub> N <sub>9</sub> (GATA) <sub>3</sub> | (GATA) <sub>3</sub> N <sub>12</sub> (GATA) <sub>14</sub> N <sub>13</sub> (GGAT) <sub>4</sub> N <sub>9</sub> (GATA) <sub>3</sub> | 19      | 761  |
| DYS510 | (GATA) <sub>3</sub> N <sub>12</sub> (GATA) <sub>11</sub> N <sub>13</sub> (GGAT) <sub>4</sub> N <sub>9</sub> (GATA) <sub>3</sub> | (GATA) <sub>3</sub> N <sub>12</sub> (GATA) <sub>10</sub> N <sub>13</sub> (GGAT) <sub>4</sub> N <sub>9</sub> (GATA) <sub>3</sub> | 19      | 916  |

|        |                                                                                                                                          |                                                                                                                                          |         |      |
|--------|------------------------------------------------------------------------------------------------------------------------------------------|------------------------------------------------------------------------------------------------------------------------------------------|---------|------|
| DYS510 | (GATA) <sub>3</sub> N <sub>12</sub> ( <b>GATA</b> ) <sub>14</sub> N <sub>13</sub> (GGAT) <sub>4</sub> N <sub>9</sub> (GATA) <sub>3</sub> | (GATA) <sub>3</sub> N <sub>12</sub> ( <b>GATA</b> ) <sub>15</sub> N <sub>13</sub> (GGAT) <sub>4</sub> N <sub>9</sub> (GATA) <sub>3</sub> | 43      | 928  |
| DYS510 | (GATA) <sub>3</sub> N <sub>12</sub> ( <b>GATA</b> ) <sub>12</sub> N <sub>13</sub> (GGAT) <sub>4</sub> N <sub>9</sub> (GATA) <sub>3</sub> | (GATA) <sub>3</sub> N <sub>12</sub> ( <b>GATA</b> ) <sub>11</sub> N <sub>13</sub> (GGAT) <sub>4</sub> N <sub>9</sub> (GATA) <sub>3</sub> | 33      | 1112 |
| DYS510 | (GATA) <sub>3</sub> N <sub>12</sub> ( <b>GATA</b> ) <sub>13</sub> N <sub>13</sub> (GGAT) <sub>4</sub> N <sub>9</sub> (GATA) <sub>3</sub> | (GATA) <sub>3</sub> N <sub>12</sub> ( <b>GATA</b> ) <sub>12</sub> N <sub>13</sub> (GGAT) <sub>4</sub> N <sub>9</sub> (GATA) <sub>3</sub> | 34      | 1118 |
| DYS510 | (GATA) <sub>3</sub> N <sub>12</sub> ( <b>GATA</b> ) <sub>14</sub> N <sub>13</sub> (GGAT) <sub>4</sub> N <sub>9</sub> (GATA) <sub>3</sub> | (GATA) <sub>3</sub> N <sub>12</sub> ( <b>GATA</b> ) <sub>15</sub> N <sub>13</sub> (GGAT) <sub>4</sub> N <sub>9</sub> (GATA) <sub>3</sub> | 45      | 1364 |
| DYS510 | (GATA) <sub>3</sub> N <sub>12</sub> ( <b>GATA</b> ) <sub>12</sub> N <sub>13</sub> (GGAT) <sub>4</sub> N <sub>9</sub> (GATA) <sub>3</sub> | (GATA) <sub>3</sub> N <sub>12</sub> ( <b>GATA</b> ) <sub>13</sub> N <sub>13</sub> (GGAT) <sub>4</sub> N <sub>9</sub> (GATA) <sub>3</sub> | 28      | 1758 |
| DYS511 | ( <b>GATA</b> ) <sub>13</sub>                                                                                                            | ( <b>GATA</b> ) <sub>12</sub>                                                                                                            | 22      | 418  |
| DYS511 | ( <b>GATA</b> ) <sub>11</sub>                                                                                                            | ( <b>GATA</b> ) <sub>12</sub>                                                                                                            | 52      | 1804 |
| DYS513 | (TCTA) <sub>4</sub> (TCCA) <sub>1</sub> (TATC) <sub>3</sub> (CGTA) <sub>1</sub> ( <b>TCTA</b> ) <sub>12</sub>                            | (TCTA) <sub>4</sub> (TCCA) <sub>1</sub> (TATC) <sub>3</sub> (CGTA) <sub>1</sub> ( <b>TCTA</b> ) <sub>13</sub>                            | 33      | 29   |
| DYS513 | (TCTA) <sub>4</sub> (TCCA) <sub>1</sub> (TATC) <sub>3</sub> (CGTA) <sub>1</sub> ( <b>TCTA</b> ) <sub>14</sub>                            | (TCTA) <sub>4</sub> (TCCA) <sub>1</sub> (TATC) <sub>3</sub> (CGTA) <sub>1</sub> ( <b>TCTA</b> ) <sub>13</sub>                            | 23      | 134  |
| DYS513 | (TCTA) <sub>4</sub> (TCCA) <sub>1</sub> (TATC) <sub>3</sub> (CGTA) <sub>1</sub> ( <b>TCTA</b> ) <sub>13</sub>                            | (TCTA) <sub>4</sub> (TCCA) <sub>1</sub> (TATC) <sub>3</sub> (CGTA) <sub>1</sub> ( <b>TCTA</b> ) <sub>12</sub>                            | 33      | 187  |
| DYS513 | (TCTA) <sub>4</sub> (TCCA) <sub>1</sub> (TATC) <sub>3</sub> (CGTA) <sub>1</sub> ( <b>TCTA</b> ) <sub>13</sub>                            | (TCTA) <sub>4</sub> (TCCA) <sub>1</sub> (TATC) <sub>3</sub> (CGTA) <sub>1</sub> ( <b>TCTA</b> ) <sub>14</sub>                            | 30      | 1181 |
| DYS513 | (TCTA) <sub>4</sub> (TCCA) <sub>1</sub> (TATC) <sub>3</sub> (CGTA) <sub>1</sub> ( <b>TCTA</b> ) <sub>13</sub>                            | (TCTA) <sub>4</sub> (TCCA) <sub>1</sub> (TATC) <sub>3</sub> (CGTA) <sub>1</sub> ( <b>TCTA</b> ) <sub>14</sub>                            | 21      | 1216 |
| DYS513 | (TCTA) <sub>4</sub> (TCCA) <sub>1</sub> (TATC) <sub>3</sub> (CGTA) <sub>1</sub> ( <b>TCTA</b> ) <sub>13</sub>                            | (TCTA) <sub>4</sub> (TCCA) <sub>1</sub> (TATC) <sub>3</sub> (CGTA) <sub>1</sub> ( <b>TCTA</b> ) <sub>14</sub>                            | Unknown | 1308 |
| DYS513 | (TCTA) <sub>4</sub> (TCCA) <sub>1</sub> (TATC) <sub>3</sub> (CGTA) <sub>1</sub> ( <b>TCTA</b> ) <sub>12</sub>                            | (TCTA) <sub>4</sub> (TCCA) <sub>1</sub> (TATC) <sub>3</sub> (CGTA) <sub>1</sub> ( <b>TCTA</b> ) <sub>11</sub>                            | 22      | 1323 |
| DYS513 | (TCTA) <sub>4</sub> (TCCA) <sub>1</sub> (TATC) <sub>3</sub> (CGTA) <sub>1</sub> ( <b>TCTA</b> ) <sub>12</sub>                            | (TCTA) <sub>4</sub> (TCCA) <sub>1</sub> (TATC) <sub>3</sub> (CGTA) <sub>1</sub> ( <b>TCTA</b> ) <sub>13</sub>                            | 36      | 1421 |
| DYS513 | (TCTA) <sub>4</sub> (TCCA) <sub>1</sub> (TATC) <sub>3</sub> (CGTA) <sub>1</sub> ( <b>TCTA</b> ) <sub>13</sub>                            | (TCTA) <sub>4</sub> (TCCA) <sub>1</sub> (TATC) <sub>3</sub> (CGTA) <sub>1</sub> ( <b>TCTA</b> ) <sub>12</sub>                            | 36      | 1672 |
| DYS513 | (TCTA) <sub>4</sub> (TCCA) <sub>1</sub> (TATC) <sub>3</sub> (CGTA) <sub>1</sub> ( <b>TCTA</b> ) <sub>11</sub>                            | (TCTA) <sub>4</sub> (TCCA) <sub>1</sub> (TATC) <sub>3</sub> (CGTA) <sub>1</sub> ( <b>TCTA</b> ) <sub>12</sub>                            | 60      | 1695 |
| DYS516 | (TTCT) <sub>4</sub> N <sub>30</sub> ( <b>TTCT</b> ) <sub>16</sub>                                                                        | (TTCT) <sub>4</sub> N <sub>30</sub> ( <b>TTCT</b> ) <sub>15</sub>                                                                        | 28      | 106  |
| DYS516 | (TTCT) <sub>4</sub> N <sub>30</sub> ( <b>TTCT</b> ) <sub>14</sub>                                                                        | (TTCT) <sub>4</sub> N <sub>30</sub> ( <b>TTCT</b> ) <sub>13</sub>                                                                        | 37      | 904  |
| DYS516 | (TTCT) <sub>4</sub> N <sub>30</sub> ( <b>TTCT</b> ) <sub>12</sub>                                                                        | (TTCT) <sub>4</sub> N <sub>30</sub> ( <b>TTCT</b> ) <sub>13</sub>                                                                        | 44      | 973  |
| DYS516 | (TTCT) <sub>4</sub> N <sub>30</sub> ( <b>TTCT</b> ) <sub>15</sub>                                                                        | (TTCT) <sub>4</sub> N <sub>30</sub> ( <b>TTCT</b> ) <sub>16</sub>                                                                        | 34      | 1030 |
| DYS516 | (TTCT) <sub>4</sub> N <sub>30</sub> ( <b>TTCT</b> ) <sub>13</sub>                                                                        | (TTCT) <sub>4</sub> N <sub>30</sub> ( <b>TTCT</b> ) <sub>14</sub>                                                                        | Unknown | 1241 |
| DYS516 | (TTCT) <sub>4</sub> N <sub>30</sub> ( <b>TTCT</b> ) <sub>12</sub>                                                                        | (TTCT) <sub>4</sub> N <sub>30</sub> ( <b>TTCT</b> ) <sub>13</sub>                                                                        | 38      | 1524 |
| DYS516 | (TTCT) <sub>4</sub> N <sub>30</sub> ( <b>TTCT</b> ) <sub>14</sub>                                                                        | (TTCT) <sub>4</sub> N <sub>30</sub> ( <b>TTCT</b> ) <sub>15</sub>                                                                        | 42      | 1628 |
| DYS516 | (TTCT) <sub>4</sub> N <sub>30</sub> ( <b>TTCT</b> ) <sub>15</sub>                                                                        | (TTCT) <sub>4</sub> N <sub>30</sub> ( <b>TTCT</b> ) <sub>16</sub>                                                                        | 22      | 1778 |
| DYS516 | (TTCT) <sub>4</sub> N <sub>30</sub> ( <b>TTCT</b> ) <sub>15</sub>                                                                        | (TTCT) <sub>4</sub> N <sub>30</sub> ( <b>TTCT</b> ) <sub>16</sub>                                                                        | 24      | 1782 |
| DYS516 | (TTCT) <sub>4</sub> N <sub>30</sub> ( <b>TTCT</b> ) <sub>12</sub>                                                                        | (TTCT) <sub>4</sub> N <sub>30</sub> ( <b>TTCT</b> ) <sub>11</sub>                                                                        | 53      | 1869 |
| DYS516 | (TTCT) <sub>4</sub> N <sub>30</sub> ( <b>TTCT</b> ) <sub>17</sub>                                                                        | (TTCT) <sub>4</sub> N <sub>30</sub> ( <b>TTCT</b> ) <sub>15</sub>                                                                        | 50      | 1881 |
| DYS517 | ( <b>AAAG</b> ) <sub>16</sub> N <sub>8</sub> (AAAG) <sub>3</sub>                                                                         | ( <b>AAAG</b> ) <sub>15</sub> N <sub>8</sub> (AAAG) <sub>3</sub>                                                                         | 26      | 802  |
| DYS517 | ( <b>AAAG</b> ) <sub>14</sub> N <sub>8</sub> (AAAG) <sub>3</sub>                                                                         | ( <b>AAAG</b> ) <sub>15</sub> N <sub>8</sub> (AAAG) <sub>3</sub>                                                                         | 30      | 1796 |

|        |                                                                                                                                                                                 |                                                                                                                                                                                 |    |      |
|--------|---------------------------------------------------------------------------------------------------------------------------------------------------------------------------------|---------------------------------------------------------------------------------------------------------------------------------------------------------------------------------|----|------|
| DYS517 | (AAAG) <sub>16</sub> N <sub>8</sub> (AAAG) <sub>3</sub>                                                                                                                         | (AAAG) <sub>15</sub> N <sub>8</sub> (AAAG) <sub>3</sub>                                                                                                                         | 63 | 1807 |
| DYS517 | (AAAG) <sub>14</sub> N <sub>8</sub> (AAAG) <sub>3</sub>                                                                                                                         | (AAAG) <sub>15</sub> N <sub>8</sub> (AAAG) <sub>3</sub>                                                                                                                         | 54 | 1860 |
| DYS517 | (AAAG) <sub>14</sub> N <sub>8</sub> (AAAG) <sub>3</sub>                                                                                                                         | (AAAG) <sub>15</sub> N <sub>8</sub> (AAAG) <sub>3</sub>                                                                                                                         | 53 | 1869 |
| DYS518 | (AAAG) <sub>3</sub> (GAAG) <sub>1</sub> (AAAG) <sub>16</sub> (GGAG) <sub>1</sub> (AAAG) <sub>4</sub><br>N <sub>6</sub> (AAAG) <sub>17</sub> N <sub>27</sub> (AAGG) <sub>4</sub> | (AAAG) <sub>3</sub> (GAAG) <sub>1</sub> (AAAG) <sub>15</sub> (GGAG) <sub>1</sub> (AAAG) <sub>4</sub><br>N <sub>6</sub> (AAAG) <sub>17</sub> N <sub>27</sub> (AAGG) <sub>4</sub> | 33 | 29   |
| DYS518 | (AAAG) <sub>3</sub> (GAAG) <sub>1</sub> (AAAG) <sub>14</sub> (GGAG) <sub>1</sub> (AAAG) <sub>4</sub><br>N <sub>6</sub> (AAAG) <sub>14</sub> N <sub>27</sub> (AAGG) <sub>4</sub> | (AAAG) <sub>3</sub> (GAAG) <sub>1</sub> (AAAG) <sub>14</sub> (GGAG) <sub>1</sub> (AAAG) <sub>4</sub><br>N <sub>6</sub> (AAAG) <sub>15</sub> N <sub>27</sub> (AAGG) <sub>4</sub> | 32 | 56   |
| DYS518 | (AAAG) <sub>3</sub> (GAAG) <sub>1</sub> (AAAG) <sub>17</sub> (GGAG) <sub>1</sub> (AAAG) <sub>4</sub><br>N <sub>6</sub> (AAAG) <sub>12</sub> N <sub>27</sub> (AAGG) <sub>4</sub> | (AAAG) <sub>3</sub> (GAAG) <sub>1</sub> (AAAG) <sub>16</sub> (GGAG) <sub>1</sub> (AAAG) <sub>4</sub><br>N <sub>6</sub> (AAAG) <sub>12</sub> N <sub>27</sub> (AAGG) <sub>4</sub> | 48 | 74   |
| DYS518 | (AAAG) <sub>3</sub> (GAAG) <sub>1</sub> (AAAG) <sub>15</sub> (GGAG) <sub>1</sub> (AAAG) <sub>4</sub><br>N <sub>6</sub> (AAAG) <sub>15</sub> N <sub>27</sub> (AAGG) <sub>4</sub> | (AAAG) <sub>3</sub> (GAAG) <sub>1</sub> (AAAG) <sub>14</sub> (GGAG) <sub>1</sub> (AAAG) <sub>4</sub><br>N <sub>6</sub> (AAAG) <sub>15</sub> N <sub>27</sub> (AAGG) <sub>4</sub> | 30 | 87   |
| DYS518 | (AAAG) <sub>3</sub> (GAAG) <sub>1</sub> (AAAG) <sub>18</sub> (GGAG) <sub>1</sub> (AAAG) <sub>4</sub><br>N <sub>6</sub> (AAAG) <sub>16</sub> N <sub>27</sub> (AAGG) <sub>4</sub> | (AAAG) <sub>3</sub> (GAAG) <sub>1</sub> (AAAG) <sub>17</sub> (GGAG) <sub>1</sub> (AAAG) <sub>4</sub><br>N <sub>6</sub> (AAAG) <sub>16</sub> N <sub>27</sub> (AAGG) <sub>4</sub> | 34 | 88   |
| DYS518 | (AAAG) <sub>3</sub> (GAAG) <sub>1</sub> (AAAG) <sub>17</sub> (GGAG) <sub>1</sub> (AAAG) <sub>4</sub><br>N <sub>6</sub> (AAAG) <sub>13</sub> N <sub>27</sub> (AAGG) <sub>4</sub> | (AAAG) <sub>3</sub> (GAAG) <sub>1</sub> (AAAG) <sub>16</sub> (GGAG) <sub>1</sub> (AAAG) <sub>4</sub><br>N <sub>6</sub> (AAAG) <sub>13</sub> N <sub>27</sub> (AAGG) <sub>4</sub> | 29 | 89   |
| DYS518 | (AAAG) <sub>3</sub> (GAAG) <sub>1</sub> (AAAG) <sub>19</sub> (GGAG) <sub>1</sub> (AAAG) <sub>4</sub><br>N <sub>6</sub> (AAAG) <sub>17</sub> N <sub>27</sub> (AAGG) <sub>4</sub> | (AAAG) <sub>3</sub> (GAAG) <sub>1</sub> (AAAG) <sub>18</sub> (GGAG) <sub>1</sub> (AAAG) <sub>4</sub><br>N <sub>6</sub> (AAAG) <sub>17</sub> N <sub>27</sub> (AAGG) <sub>4</sub> | 50 | 270  |
| DYS518 | (AAAG) <sub>3</sub> (GAAG) <sub>1</sub> (AAAG) <sub>18</sub> (GGAG) <sub>1</sub> (AAAG) <sub>4</sub><br>N <sub>6</sub> (AAAG) <sub>15</sub> N <sub>27</sub> (AAGG) <sub>4</sub> | (AAAG) <sub>3</sub> (GAAG) <sub>1</sub> (AAAG) <sub>19</sub> (GGAG) <sub>1</sub> (AAAG) <sub>4</sub><br>N <sub>6</sub> (AAAG) <sub>15</sub> N <sub>27</sub> (AAGG) <sub>4</sub> | 25 | 426  |
| DYS518 | (AAAG) <sub>3</sub> (GAAG) <sub>1</sub> (AAAG) <sub>22</sub> (GGAG) <sub>1</sub> (AAAG) <sub>4</sub><br>N <sub>6</sub> (AAAG) <sub>13</sub> N <sub>27</sub> (AAGG) <sub>4</sub> | (AAAG) <sub>3</sub> (GAAG) <sub>1</sub> (AAAG) <sub>21</sub> (GGAG) <sub>1</sub> (AAAG) <sub>4</sub><br>N <sub>6</sub> (AAAG) <sub>13</sub> N <sub>27</sub> (AAGG) <sub>4</sub> | 26 | 433  |
| DYS518 | (AAAG) <sub>3</sub> (GAAG) <sub>1</sub> (AAAG) <sub>15</sub> (GGAG) <sub>1</sub> (AAAG) <sub>4</sub><br>N <sub>6</sub> (AAAG) <sub>12</sub> N <sub>27</sub> (AAGG) <sub>4</sub> | (AAAG) <sub>3</sub> (GAAG) <sub>1</sub> (AAAG) <sub>15</sub> (GGAG) <sub>1</sub> (AAAG) <sub>4</sub><br>N <sub>6</sub> (AAAG) <sub>11</sub> N <sub>27</sub> (AAGG) <sub>4</sub> | 28 | 525  |
| DYS518 | (AAAG) <sub>3</sub> (GAAG) <sub>1</sub> (AAAG) <sub>15</sub> (GGAG) <sub>1</sub> (AAAG) <sub>4</sub><br>N <sub>6</sub> (AAAG) <sub>17</sub> N <sub>27</sub> (AAGG) <sub>4</sub> | (AAAG) <sub>3</sub> (GAAG) <sub>1</sub> (AAAG) <sub>15</sub> (GGAG) <sub>1</sub> (AAAG) <sub>4</sub><br>N <sub>6</sub> (AAAG) <sub>16</sub> N <sub>27</sub> (AAGG) <sub>4</sub> | 24 | 571  |
| DYS518 | (AAAG) <sub>3</sub> (GAAG) <sub>1</sub> (AAAG) <sub>18</sub> (GGAG) <sub>1</sub> (AAAG) <sub>4</sub><br>N <sub>6</sub> (AAAG) <sub>14</sub> N <sub>27</sub> (AAGG) <sub>4</sub> | (AAAG) <sub>3</sub> (GAAG) <sub>1</sub> (AAAG) <sub>17</sub> (GGAG) <sub>1</sub> (AAAG) <sub>4</sub><br>N <sub>6</sub> (AAAG) <sub>14</sub> N <sub>27</sub> (AAGG) <sub>4</sub> | 21 | 593  |
| DYS518 | (AAAG) <sub>3</sub> (GAAG) <sub>1</sub> (AAAG) <sub>16</sub> (GGAG) <sub>1</sub> (AAAG) <sub>4</sub> N <sub>6</sub> (AAAG) <sub>11</sub> N <sub>27</sub> (AAGG) <sub>4</sub>    | (AAAG) <sub>3</sub> (GAAG) <sub>1</sub> (AAAG) <sub>15</sub> (GGAG) <sub>1</sub> (AAAG) <sub>4</sub><br>N <sub>6</sub> (AAAG) <sub>17</sub> N <sub>27</sub> (AAGG) <sub>4</sub> | 23 | 687  |
| DYS518 | (AAAG) <sub>3</sub> (GAAG) <sub>1</sub> (AAAG) <sub>16</sub> (GGAG) <sub>1</sub> (AAAG) <sub>4</sub><br>N <sub>6</sub> (AAAG) <sub>14</sub> N <sub>27</sub> (AAGG) <sub>4</sub> | (AAAG) <sub>3</sub> (GAAG) <sub>1</sub> (AAAG) <sub>16</sub> (GGAG) <sub>1</sub> (AAAG) <sub>4</sub><br>N <sub>6</sub> (AAAG) <sub>15</sub> N <sub>27</sub> (AAGG) <sub>4</sub> | 20 | 703  |
| DYS518 | (AAAG) <sub>3</sub> (GAAG) <sub>1</sub> (AAAG) <sub>17</sub> (GGAG) <sub>1</sub> (AAAG) <sub>4</sub><br>N <sub>6</sub> (AAAG) <sub>15</sub> N <sub>27</sub> (AAGG) <sub>4</sub> | (AAAG) <sub>3</sub> (GAAG) <sub>1</sub> (AAAG) <sub>16</sub> (GGAG) <sub>1</sub> (AAAG) <sub>4</sub><br>N <sub>6</sub> (AAAG) <sub>15</sub> N <sub>27</sub> (AAGG) <sub>4</sub> | 20 | 741  |
| DYS518 | (AAAG) <sub>3</sub> (GAAG) <sub>1</sub> (AAAG) <sub>15</sub> (GGAG) <sub>1</sub> (AAAG) <sub>4</sub><br>N <sub>6</sub> (AAAG) <sub>16</sub> N <sub>27</sub> (AAGG) <sub>4</sub> | (AAAG) <sub>3</sub> (GAAG) <sub>1</sub> (AAAG) <sub>15</sub> (GGAG) <sub>1</sub> (AAAG) <sub>4</sub><br>N <sub>6</sub> (AAAG) <sub>17</sub> N <sub>27</sub> (AAGG) <sub>4</sub> | 22 | 747  |
| DYS518 | (AAAG) <sub>3</sub> (GAAG) <sub>1</sub> (AAAG) <sub>15</sub> (GGAG) <sub>1</sub> (AAAG) <sub>4</sub><br>N <sub>6</sub> (AAAG) <sub>16</sub> N <sub>27</sub> (AAGG) <sub>4</sub> | (AAAG) <sub>3</sub> (GAAG) <sub>1</sub> (AAAG) <sub>16</sub> (GGAG) <sub>1</sub> (AAAG) <sub>4</sub><br>N <sub>6</sub> (AAAG) <sub>16</sub> N <sub>27</sub> (AAGG) <sub>4</sub> | 15 | 763  |

|         |                                                                                                                                                                                 |                                                                                                                                                                                 |    |      |
|---------|---------------------------------------------------------------------------------------------------------------------------------------------------------------------------------|---------------------------------------------------------------------------------------------------------------------------------------------------------------------------------|----|------|
| DYS518  | (AAAG) <sub>3</sub> (GAAG) <sub>1</sub> (AAAG) <sub>17</sub> (GGAG) <sub>1</sub> (AAAG) <sub>4</sub><br>N <sub>6</sub> (AAAG) <sub>14</sub> N <sub>27</sub> (AAGG) <sub>4</sub> | (AAAG) <sub>3</sub> (GAAG) <sub>1</sub> (AAAG) <sub>16</sub> (GGAG) <sub>1</sub> (AAAG) <sub>4</sub><br>N <sub>6</sub> (AAAG) <sub>16</sub> N <sub>27</sub> (AAGG) <sub>4</sub> | 22 | 817  |
| DYS518  | (AAAG) <sub>3</sub> (GAAG) <sub>1</sub> (AAAG) <sub>16</sub> (GGAG) <sub>1</sub> (AAAG) <sub>4</sub><br>N <sub>6</sub> (AAAG) <sub>18</sub> N <sub>27</sub> (AAGG) <sub>4</sub> | (AAAG) <sub>3</sub> (GAAG) <sub>1</sub> (AAAG) <sub>16</sub> (GGAG) <sub>1</sub> (AAAG) <sub>4</sub><br>N <sub>6</sub> (AAAG) <sub>17</sub> N <sub>27</sub> (AAGG) <sub>4</sub> | 23 | 888  |
| DYS518  | (AAAG) <sub>3</sub> (GAAG) <sub>1</sub> (AAAG) <sub>15</sub> (GGAG) <sub>1</sub> (AAAG) <sub>4</sub><br>N <sub>6</sub> (AAAG) <sub>16</sub> N <sub>27</sub> (AAGG) <sub>4</sub> | (AAAG) <sub>3</sub> (GAAG) <sub>1</sub> (AAAG) <sub>14</sub> (GGAG) <sub>1</sub> (AAAG) <sub>4</sub><br>N <sub>6</sub> (AAAG) <sub>16</sub> N <sub>27</sub> (AAGG) <sub>4</sub> | 19 | 916  |
| DYS518  | (AAAG) <sub>3</sub> (GAAG) <sub>1</sub> (AAAG) <sub>17</sub> (GGAG) <sub>1</sub> (AAAG) <sub>4</sub><br>N <sub>6</sub> (AAAG) <sub>16</sub> N <sub>27</sub> (AAGG) <sub>4</sub> | (AAAG) <sub>3</sub> (GAAG) <sub>1</sub> (AAAG) <sub>17</sub> (GGAG) <sub>1</sub> (AAAG) <sub>4</sub><br>N <sub>6</sub> (AAAG) <sub>15</sub> N <sub>27</sub> (AAGG) <sub>4</sub> | 56 | 1043 |
| DYS518  | (AAAG) <sub>3</sub> (GAAG) <sub>1</sub> (AAAG) <sub>17</sub> (GGAG) <sub>1</sub> (AAAG) <sub>4</sub><br>N <sub>6</sub> (AAAG) <sub>17</sub> N <sub>27</sub> (AAGG) <sub>4</sub> | (AAAG) <sub>3</sub> (GAAG) <sub>1</sub> (AAAG) <sub>17</sub> (GGAG) <sub>1</sub> (AAAG) <sub>4</sub><br>N <sub>6</sub> (AAAG) <sub>16</sub> N <sub>27</sub> (AAGG) <sub>4</sub> | 37 | 1107 |
| DYS518  | (AAAG) <sub>3</sub> (GAAG) <sub>1</sub> (AAAG) <sub>18</sub> (GGAG) <sub>1</sub> (AAAG) <sub>4</sub><br>N <sub>6</sub> (AAAG) <sub>17</sub> N <sub>27</sub> (AAGG) <sub>4</sub> | (AAAG) <sub>3</sub> (GAAG) <sub>1</sub> (AAAG) <sub>18</sub> (GGAG) <sub>1</sub> (AAAG) <sub>4</sub><br>N <sub>6</sub> (AAAG) <sub>18</sub> N <sub>27</sub> (AAGG) <sub>4</sub> | 19 | 1115 |
| DYS518  | (AAAG) <sub>3</sub> (GAAG) <sub>1</sub> (AAAG) <sub>17</sub> (GGAG) <sub>1</sub> (AAAG) <sub>4</sub><br>N <sub>6</sub> (AAAG) <sub>17</sub> N <sub>27</sub> (AAGG) <sub>4</sub> | (AAAG) <sub>3</sub> (GAAG) <sub>1</sub> (AAAG) <sub>17</sub> (GGAG) <sub>1</sub> (AAAG) <sub>4</sub><br>N <sub>6</sub> (AAAG) <sub>16</sub> N <sub>27</sub> (AAGG) <sub>4</sub> | 21 | 1273 |
| DYS518  | (AAAG) <sub>3</sub> (GAAG) <sub>1</sub> (AAAG) <sub>15</sub> (GGAG) <sub>1</sub> (AAAG) <sub>4</sub><br>N <sub>6</sub> (AAAG) <sub>13</sub> N <sub>27</sub> (AAGG) <sub>4</sub> | (AAAG) <sub>3</sub> (GAAG) <sub>1</sub> (AAAG) <sub>16</sub> (GGAG) <sub>1</sub> (AAAG) <sub>4</sub><br>N <sub>6</sub> (AAAG) <sub>13</sub> N <sub>27</sub> (AAGG) <sub>4</sub> | 45 | 1364 |
| DYS518  | (AAAG) <sub>3</sub> (GAAG) <sub>1</sub> (AAAG) <sub>16</sub> (GGAG) <sub>1</sub> (AAAG) <sub>4</sub><br>N <sub>6</sub> (AAAG) <sub>17</sub> N <sub>27</sub> (AAGG) <sub>4</sub> | (AAAG) <sub>3</sub> (GAAG) <sub>1</sub> (AAAG) <sub>15</sub> (GGAG) <sub>1</sub> (AAAG) <sub>4</sub><br>N <sub>6</sub> (AAAG) <sub>15</sub> N <sub>27</sub> (AAGG) <sub>4</sub> | 42 | 1411 |
| DYS518  | (AAAG) <sub>3</sub> (GAAG) <sub>1</sub> (AAAG) <sub>16</sub> (GGAG) <sub>1</sub> (AAAG) <sub>4</sub><br>N <sub>6</sub> (AAAG) <sub>18</sub> N <sub>27</sub> (AAGG) <sub>4</sub> | (AAAG) <sub>3</sub> (GAAG) <sub>1</sub> (AAAG) <sub>16</sub> (GGAG) <sub>1</sub> (AAAG) <sub>4</sub><br>N <sub>6</sub> (AAAG) <sub>19</sub> N <sub>27</sub> (AAGG) <sub>4</sub> | 32 | 1545 |
| DYS518  | (AAAG) <sub>3</sub> (GAAG) <sub>1</sub> (AAAG) <sub>16</sub> (GGAG) <sub>1</sub> (AAAG) <sub>4</sub><br>N <sub>6</sub> (AAAG) <sub>15</sub> N <sub>27</sub> (AAGG) <sub>4</sub> | (AAAG) <sub>3</sub> (GAAG) <sub>1</sub> (AAAG) <sub>15</sub> (GGAG) <sub>1</sub> (AAAG) <sub>4</sub><br>N <sub>6</sub> (AAAG) <sub>15</sub> N <sub>27</sub> (AAGG) <sub>4</sub> | 29 | 1790 |
| DYS520  | (GATA) <sub>12</sub> (CATA) <sub>11</sub>                                                                                                                                       | (GATA) <sub>11</sub> (CATA) <sub>11</sub>                                                                                                                                       | 32 | 56   |
| DYS520  | (GATA) <sub>12</sub> (CATA) <sub>11</sub>                                                                                                                                       | (GATA) <sub>11</sub> (CATA) <sub>11</sub>                                                                                                                                       | 34 | 88   |
| DYS520  | (GATA) <sub>12</sub> (CATA) <sub>10</sub>                                                                                                                                       | (GATA) <sub>12</sub> (CATA) <sub>11</sub>                                                                                                                                       | 31 | 141  |
| DYS520  | (GATA) <sub>11</sub> (CATA) <sub>11</sub>                                                                                                                                       | (GATA) <sub>12</sub> (CATA) <sub>11</sub>                                                                                                                                       | 31 | 434  |
| DYS521  | (CTTT) <sub>5</sub> (TCTT) <sub>3</sub> (TTTT) <sub>1</sub> (CTTT) <sub>5</sub> T(CTTT) <sub>13</sub>                                                                           | (CTTT) <sub>5</sub> (TCTT) <sub>3</sub> (TTTT) <sub>1</sub> (CTTT) <sub>5</sub> T(CTTT) <sub>12</sub>                                                                           | 25 | 133  |
| DYS522  | (ATAG) <sub>10</sub>                                                                                                                                                            | (ATAG) <sub>11</sub>                                                                                                                                                            | 22 | 1088 |
| DYS525  | (AGAT) <sub>11</sub>                                                                                                                                                            | (AGAT) <sub>10</sub>                                                                                                                                                            | 24 | 571  |
| DYS526a | (CCTT) <sub>16</sub>                                                                                                                                                            | (CCTT) <sub>15</sub>                                                                                                                                                            | 64 | 166  |
| DYS526a | (CCTT) <sub>13</sub>                                                                                                                                                            | (CCTT) <sub>14</sub>                                                                                                                                                            | 53 | 453  |
| DYS526a | (CCTT) <sub>14</sub>                                                                                                                                                            | (CCTT) <sub>13</sub>                                                                                                                                                            | 31 | 1315 |
| DYS526a | (CCTT) <sub>11</sub>                                                                                                                                                            | (CCTT) <sub>12</sub>                                                                                                                                                            | 31 | 1652 |
| DYS526b | (CCCT) <sub>3</sub> N <sub>20</sub> (CTTT) <sub>14</sub> (CCTT) <sub>9</sub> N <sub>113</sub> (CCTT) <sub>11</sub>                                                              | (CCCT) <sub>3</sub> N <sub>20</sub> (CTTT) <sub>13</sub> (CCTT) <sub>9</sub> N <sub>113</sub> (CCTT) <sub>11</sub>                                                              | 24 | 17   |
| DYS526b | (CCCT) <sub>3</sub> N <sub>20</sub> (CTTT) <sub>16</sub> (CCTT) <sub>9</sub> N <sub>113</sub> (CCTT) <sub>14</sub>                                                              | (CCCT) <sub>3</sub> N <sub>20</sub> (CTTT) <sub>15</sub> (CCTT) <sub>9</sub> N <sub>113</sub> (CCTT) <sub>14</sub>                                                              | 50 | 42   |

|         |                                                                                                                                                                                                                                                                                      |                                                                                                                                                                                                                                                                                      |    |      |
|---------|--------------------------------------------------------------------------------------------------------------------------------------------------------------------------------------------------------------------------------------------------------------------------------------|--------------------------------------------------------------------------------------------------------------------------------------------------------------------------------------------------------------------------------------------------------------------------------------|----|------|
| DYS526b | (CCCT) <sub>3</sub> N <sub>20</sub> (CTTT) <sub>17</sub> (CCTT) <sub>9</sub> N <sub>113</sub> (CCTT) <sub>14</sub>                                                                                                                                                                   | (CCCT) <sub>3</sub> N <sub>20</sub> (CTTT) <sub>16</sub> (CCTT) <sub>9</sub> N <sub>113</sub> (CCTT) <sub>14</sub>                                                                                                                                                                   | 34 | 88   |
| DYS526b | (CCCT) <sub>3</sub> N <sub>20</sub> (CTTT) <sub>16</sub> (CCTT) <sub>9</sub> N <sub>113</sub> (CCTT) <sub>12</sub>                                                                                                                                                                   | (CCCT) <sub>3</sub> N <sub>20</sub> (CTTT) <sub>15</sub> (CCTT) <sub>9</sub> N <sub>113</sub> (CCTT) <sub>12</sub>                                                                                                                                                                   | 25 | 185  |
| DYS526b | (CCCT) <sub>3</sub> N <sub>20</sub> (CTTT) <sub>17</sub> (CCTT) <sub>9</sub> N <sub>113</sub> (CCTT) <sub>14</sub>                                                                                                                                                                   | (CCCT) <sub>3</sub> N <sub>20</sub> (CTTT) <sub>16</sub> (CCTT) <sub>9</sub> N <sub>113</sub> (CCTT) <sub>14</sub>                                                                                                                                                                   | 41 | 298  |
| DYS526b | (CCCT) <sub>3</sub> N <sub>20</sub> (CTTT) <sub>16</sub> (CCTT) <sub>9</sub> N <sub>113</sub> (CCTT) <sub>14</sub>                                                                                                                                                                   | (CCCT) <sub>3</sub> N <sub>20</sub> (CTTT) <sub>15</sub> (CCTT) <sub>9</sub> N <sub>113</sub> (CCTT) <sub>14</sub>                                                                                                                                                                   | 41 | 386  |
| DYS526b | (CCCT) <sub>3</sub> N <sub>20</sub> (CTTT) <sub>11</sub> (CCTT) <sub>9</sub> N <sub>113</sub> (CCTT) <sub>14</sub>                                                                                                                                                                   | (CCCT) <sub>3</sub> N <sub>20</sub> (CTTT) <sub>12</sub> (CCTT) <sub>9</sub> N <sub>113</sub> (CCTT) <sub>14</sub>                                                                                                                                                                   | 31 | 505  |
| DYS526b | (CCCT) <sub>3</sub> N <sub>20</sub> (CTTT) <sub>16</sub> (CCTT) <sub>9</sub> N <sub>113</sub> (CCTT) <sub>10</sub>                                                                                                                                                                   | (CCCT) <sub>3</sub> N <sub>20</sub> (CTTT) <sub>17</sub> (CCTT) <sub>9</sub> N <sub>113</sub> (CCTT) <sub>10</sub>                                                                                                                                                                   | 32 | 523  |
| DYS526b | (CCCT) <sub>3</sub> N <sub>20</sub> (CTTT) <sub>17</sub> (CCTT) <sub>9</sub> N <sub>113</sub> (CCTT) <sub>10</sub>                                                                                                                                                                   | (CCCT) <sub>3</sub> N <sub>20</sub> (CTTT) <sub>16</sub> (CCTT) <sub>9</sub> N <sub>113</sub> (CCTT) <sub>10</sub>                                                                                                                                                                   | 39 | 654  |
| DYS526b | (CCCT) <sub>3</sub> N <sub>20</sub> (CTTT) <sub>16</sub> (CCTT) <sub>9</sub> N <sub>113</sub> (CCTT) <sub>14</sub>                                                                                                                                                                   | (CCCT) <sub>3</sub> N <sub>20</sub> (CTTT) <sub>17</sub> (CCTT) <sub>9</sub> N <sub>113</sub> (CCTT) <sub>14</sub>                                                                                                                                                                   | 25 | 918  |
| DYS526b | (CCCT) <sub>3</sub> N <sub>20</sub> (CTTT) <sub>15</sub> (CCTT) <sub>9</sub> N <sub>113</sub> (CCTT) <sub>14</sub>                                                                                                                                                                   | (CCCT) <sub>3</sub> N <sub>20</sub> (CTTT) <sub>15</sub> (CCTT) <sub>8</sub> N <sub>113</sub> (CCTT) <sub>14</sub>                                                                                                                                                                   | 36 | 983  |
| DYS526b | (CCCT) <sub>3</sub> N <sub>20</sub> (CTTT) <sub>15</sub> (CCTT) <sub>9</sub> N <sub>113</sub> (CCTT) <sub>14</sub>                                                                                                                                                                   | (CCCT) <sub>3</sub> N <sub>20</sub> (CTTT) <sub>16</sub> (CCTT) <sub>9</sub> N <sub>113</sub> (CCTT) <sub>14</sub>                                                                                                                                                                   | 37 | 1107 |
| DYS526b | (CCCT) <sub>3</sub> N <sub>20</sub> (CTTT) <sub>14</sub> (CCTT) <sub>9</sub> N <sub>113</sub> (CCTT) <sub>14</sub>                                                                                                                                                                   | (CCCT) <sub>3</sub> N <sub>20</sub> (CTTT) <sub>15</sub> (CCTT) <sub>9</sub> N <sub>113</sub> (CCTT) <sub>14</sub>                                                                                                                                                                   | 41 | 1122 |
| DYS526b | (CCCT) <sub>3</sub> N <sub>20</sub> (CTTT) <sub>15</sub> (CCTT) <sub>9</sub> N <sub>113</sub> (CCTT) <sub>14</sub>                                                                                                                                                                   | (CCCT) <sub>3</sub> N <sub>20</sub> (CTTT) <sub>14</sub> (CCTT) <sub>9</sub> N <sub>113</sub> (CCTT) <sub>14</sub>                                                                                                                                                                   | 22 | 1161 |
| DYS526b | (CCCT) <sub>3</sub> N <sub>20</sub> (CTTT) <sub>13</sub> (CCTT) <sub>9</sub> N <sub>113</sub> (CCTT) <sub>14</sub>                                                                                                                                                                   | (CCCT) <sub>3</sub> N <sub>20</sub> (CTTT) <sub>14</sub> (CCTT) <sub>9</sub> N <sub>113</sub> (CCTT) <sub>14</sub>                                                                                                                                                                   | 45 | 1171 |
| DYS526b | (CCCT) <sub>3</sub> N <sub>20</sub> (CTTT) <sub>16</sub> (CCTT) <sub>9</sub> N <sub>113</sub> (CCTT) <sub>14</sub>                                                                                                                                                                   | (CCCT) <sub>3</sub> N <sub>20</sub> (CTTT) <sub>15</sub> (CCTT) <sub>9</sub> N <sub>113</sub> (CCTT) <sub>14</sub>                                                                                                                                                                   | 48 | 1250 |
| DYS526b | (CCCT) <sub>3</sub> N <sub>20</sub> (CTTT) <sub>13</sub> (CCTT) <sub>9</sub> N <sub>113</sub> (CCTT) <sub>12</sub>                                                                                                                                                                   | (CCCT) <sub>3</sub> N <sub>20</sub> (CTTT) <sub>14</sub> (CCTT) <sub>9</sub> N <sub>113</sub> (CCTT) <sub>12</sub>                                                                                                                                                                   | 54 | 1447 |
| DYS526b | (CCCT) <sub>3</sub> N <sub>20</sub> (CTTT) <sub>13</sub> (CCTT) <sub>9</sub> N <sub>113</sub> (CCTT) <sub>13</sub>                                                                                                                                                                   | (CCCT) <sub>3</sub> N <sub>20</sub> (CTTT) <sub>12</sub> (CCTT) <sub>9</sub> N <sub>113</sub> (CCTT) <sub>13</sub>                                                                                                                                                                   | 21 | 1555 |
| DYS526b | (CCCT) <sub>3</sub> N <sub>20</sub> (CTTT) <sub>14</sub> (CCTT) <sub>9</sub> N <sub>113</sub> (CCTT) <sub>13</sub>                                                                                                                                                                   | (CCCT) <sub>3</sub> N <sub>20</sub> (CTTT) <sub>15</sub> (CCTT) <sub>9</sub> N <sub>113</sub> (CCTT) <sub>13</sub>                                                                                                                                                                   | 29 | 1662 |
| DYS526b | (CCCT) <sub>3</sub> N <sub>20</sub> (CTTT) <sub>15</sub> (CCTT) <sub>9</sub> N <sub>113</sub> (CCTT) <sub>14</sub>                                                                                                                                                                   | (CCCT) <sub>3</sub> N <sub>20</sub> (CTTT) <sub>16</sub> (CCTT) <sub>9</sub> N <sub>113</sub> (CCTT) <sub>14</sub>                                                                                                                                                                   | 50 | 1881 |
| DYS531  | (AAAT) <sub>11</sub>                                                                                                                                                                                                                                                                 | (AAAT) <sub>9</sub>                                                                                                                                                                                                                                                                  | 22 | 747  |
| DYS532  | (TCCC) <sub>3</sub> N <sub>5</sub> (TTCC) <sub>5</sub> N <sub>9</sub> (TTCT) <sub>3</sub> (TTCC) <sub>1</sub> (TTCT) <sub>12</sub> N <sub>17</sub><br>(TTCT) <sub>3</sub> N <sub>13</sub> (TTCC) <sub>4</sub> N <sub>70</sub> (TTCT) <sub>3</sub> N <sub>6</sub> (TTCT) <sub>3</sub> | (TCCC) <sub>3</sub> N <sub>5</sub> (TTCC) <sub>5</sub> N <sub>9</sub> (TTCT) <sub>3</sub> (TTCC) <sub>1</sub> (TTCT) <sub>13</sub> N <sub>17</sub><br>(TTCT) <sub>3</sub> N <sub>13</sub> (TTCC) <sub>4</sub> N <sub>70</sub> (TTCT) <sub>3</sub> N <sub>6</sub> (TTCT) <sub>3</sub> | 26 | 759  |
| DYS532  | (TCCC) <sub>3</sub> N <sub>5</sub> (TTCC) <sub>5</sub> N <sub>9</sub> (TTCT) <sub>3</sub> (TTCC) <sub>1</sub> (TTCT) <sub>12</sub> N <sub>17</sub><br>(TTCT) <sub>3</sub> N <sub>13</sub> (TTCC) <sub>4</sub> N <sub>70</sub> (TTCT) <sub>3</sub> N <sub>6</sub> (TTCT) <sub>3</sub> | (TCCC) <sub>3</sub> N <sub>5</sub> (TTCC) <sub>5</sub> N <sub>9</sub> (TTCT) <sub>3</sub> (TTCC) <sub>1</sub> (TTCT) <sub>11</sub> N <sub>17</sub><br>(TTCT) <sub>3</sub> N <sub>13</sub> (TTCC) <sub>4</sub> N <sub>70</sub> (TTCT) <sub>3</sub> N <sub>6</sub> (TTCT) <sub>3</sub> | 30 | 1101 |
| DYS532  | (TCCC) <sub>3</sub> N <sub>5</sub> (TTCC) <sub>5</sub> N <sub>9</sub> (TTCT) <sub>3</sub> (TTCC) <sub>1</sub> (TTCT) <sub>12</sub> N <sub>17</sub><br>(TTCT) <sub>3</sub> N <sub>13</sub> (TTCC) <sub>4</sub> N <sub>70</sub> (TTCT) <sub>3</sub> N <sub>6</sub> (TTCT) <sub>3</sub> | (TCCC) <sub>3</sub> N <sub>5</sub> (TTCC) <sub>5</sub> N <sub>9</sub> (TTCT) <sub>3</sub> (TTCC) <sub>1</sub> (TTCT) <sub>13</sub> N <sub>17</sub><br>(TTCT) <sub>3</sub> N <sub>13</sub> (TTCC) <sub>4</sub> N <sub>70</sub> (TTCT) <sub>3</sub> N <sub>6</sub> (TTCT) <sub>3</sub> | 29 | 1255 |
| DYS532  | (TCCC) <sub>3</sub> N <sub>5</sub> (TTCC) <sub>5</sub> N <sub>9</sub> (TTCT) <sub>3</sub> (TTCC) <sub>1</sub> (TTCT) <sub>12</sub> N <sub>17</sub><br>(TTCT) <sub>3</sub> N <sub>13</sub> (TTCC) <sub>4</sub> N <sub>70</sub> (TTCT) <sub>3</sub> N <sub>6</sub> (TTCT) <sub>3</sub> | (TCCC) <sub>3</sub> N <sub>5</sub> (TTCC) <sub>5</sub> N <sub>9</sub> (TTCT) <sub>3</sub> (TTCC) <sub>1</sub> (TTCT) <sub>13</sub> N <sub>17</sub><br>(TTCT) <sub>3</sub> N <sub>13</sub> (TTCC) <sub>4</sub> N <sub>70</sub> (TTCT) <sub>3</sub> N <sub>6</sub> (TTCT) <sub>3</sub> | 30 | 1347 |
| DYS533  | (TATC) <sub>13</sub>                                                                                                                                                                                                                                                                 | (TATC) <sub>12</sub>                                                                                                                                                                                                                                                                 | 34 | 27   |
| DYS533  | (TATC) <sub>13</sub>                                                                                                                                                                                                                                                                 | (TATC) <sub>12</sub>                                                                                                                                                                                                                                                                 | 29 | 892  |
| DYS533  | (TATC) <sub>13</sub>                                                                                                                                                                                                                                                                 | (TATC) <sub>12</sub>                                                                                                                                                                                                                                                                 | 37 | 905  |
| DYS533  | (TATC) <sub>13</sub>                                                                                                                                                                                                                                                                 | (TATC) <sub>14</sub>                                                                                                                                                                                                                                                                 | 18 | 1039 |
| DYS533  | (TATC) <sub>12</sub>                                                                                                                                                                                                                                                                 | (TATC) <sub>13</sub>                                                                                                                                                                                                                                                                 | 42 | 1054 |

|        |                                                                                            |                                                                                            |    |      |
|--------|--------------------------------------------------------------------------------------------|--------------------------------------------------------------------------------------------|----|------|
| DYS533 | (TATC) <sub>14</sub>                                                                       | (TATC) <sub>15</sub>                                                                       | 34 | 1158 |
| DYS533 | (TATC) <sub>12</sub>                                                                       | (TATC) <sub>13</sub>                                                                       | 21 | 1166 |
| DYS533 | (TATC) <sub>13</sub>                                                                       | (TATC) <sub>12</sub>                                                                       | 40 | 1281 |
| DYS534 | (CTTT) <sub>3</sub> N <sub>8</sub> (CTTT) <sub>16</sub> N <sub>9</sub> (CTTT) <sub>3</sub> | (CTTT) <sub>3</sub> N <sub>8</sub> (CTTT) <sub>17</sub> N <sub>9</sub> (CTTT) <sub>3</sub> | 37 | 135  |
| DYS534 | (CTTT) <sub>3</sub> N <sub>8</sub> (CTTT) <sub>16</sub> N <sub>9</sub> (CTTT) <sub>3</sub> | (CTTT) <sub>3</sub> N <sub>8</sub> (CTTT) <sub>17</sub> N <sub>9</sub> (CTTT) <sub>3</sub> | 27 | 167  |
| DYS534 | (CTTT) <sub>3</sub> N <sub>8</sub> (CTTT) <sub>15</sub> N <sub>9</sub> (CTTT) <sub>3</sub> | (CTTT) <sub>3</sub> N <sub>8</sub> (CTTT) <sub>16</sub> N <sub>9</sub> (CTTT) <sub>3</sub> | 17 | 235  |
| DYS534 | (CTTT) <sub>3</sub> N <sub>8</sub> (CTTT) <sub>14</sub> N <sub>9</sub> (CTTT) <sub>3</sub> | (CTTT) <sub>3</sub> N <sub>8</sub> (CTTT) <sub>15</sub> N <sub>9</sub> (CTTT) <sub>3</sub> | 41 | 250  |
| DYS534 | (CTTT) <sub>3</sub> N <sub>8</sub> (CTTT) <sub>14</sub> N <sub>9</sub> (CTTT) <sub>3</sub> | (CTTT) <sub>3</sub> N <sub>8</sub> (CTTT) <sub>15</sub> N <sub>9</sub> (CTTT) <sub>3</sub> | 34 | 308  |
| DYS534 | (CTTT) <sub>3</sub> N <sub>8</sub> (CTTT) <sub>17</sub> N <sub>9</sub> (CTTT) <sub>3</sub> | (CTTT) <sub>3</sub> N <sub>8</sub> (CTTT) <sub>16</sub> N <sub>9</sub> (CTTT) <sub>3</sub> | 39 | 419  |
| DYS534 | (CTTT) <sub>3</sub> N <sub>8</sub> (CTTT) <sub>18</sub> N <sub>9</sub> (CTTT) <sub>3</sub> | (CTTT) <sub>3</sub> N <sub>8</sub> (CTTT) <sub>19</sub> N <sub>9</sub> (CTTT) <sub>3</sub> | 28 | 674  |
| DYS534 | (CTTT) <sub>3</sub> N <sub>8</sub> (CTTT) <sub>13</sub> N <sub>9</sub> (CTTT) <sub>3</sub> | (CTTT) <sub>3</sub> N <sub>8</sub> (CTTT) <sub>14</sub> N <sub>9</sub> (CTTT) <sub>3</sub> | 23 | 1205 |
| DYS534 | (CTTT) <sub>3</sub> N <sub>8</sub> (CTTT) <sub>16</sub> N <sub>9</sub> (CTTT) <sub>3</sub> | (CTTT) <sub>3</sub> N <sub>8</sub> (CTTT) <sub>17</sub> N <sub>9</sub> (CTTT) <sub>3</sub> | 45 | 1364 |
| DYS534 | (CTTT) <sub>3</sub> N <sub>8</sub> (CTTT) <sub>14</sub> N <sub>9</sub> (CTTT) <sub>3</sub> | (CTTT) <sub>3</sub> N <sub>8</sub> (CTTT) <sub>13</sub> N <sub>9</sub> (CTTT) <sub>3</sub> | 58 | 1808 |
| DYS534 | (CTTT) <sub>3</sub> N <sub>8</sub> (CTTT) <sub>17</sub> N <sub>9</sub> (CTTT) <sub>3</sub> | (CTTT) <sub>3</sub> N <sub>8</sub> (CTTT) <sub>18</sub> N <sub>9</sub> (CTTT) <sub>3</sub> | 61 | 1836 |
| DYS536 | (TCCT) <sub>12</sub> N <sub>8</sub> (TTCT) <sub>4</sub>                                    | (TCCT) <sub>13</sub> N <sub>8</sub> (TTCT) <sub>4</sub>                                    | 20 | 1092 |
| DYS537 | (TCTA) <sub>12</sub>                                                                       | (TCTA) <sub>13</sub>                                                                       | 29 | 609  |
| DYS537 | (TCTA) <sub>13</sub>                                                                       | (TCTA) <sub>12</sub>                                                                       | 27 | 1248 |
| DYS537 | (TCTA) <sub>11</sub>                                                                       | (TCTA) <sub>12</sub>                                                                       | 40 | 1427 |
| DYS539 | (TAGA) <sub>11</sub>                                                                       | (TAGA) <sub>10</sub>                                                                       | 63 | 1902 |
| DYS540 | (TTAT) <sub>12</sub>                                                                       | (TTAT) <sub>13</sub>                                                                       | 31 | 141  |
| DYS540 | (TTAT) <sub>12</sub>                                                                       | (TTAT) <sub>11</sub>                                                                       | 59 | 152  |
| DYS540 | (TTAT) <sub>11</sub>                                                                       | (TTAT) <sub>10</sub>                                                                       | 19 | 682  |
| DYS540 | (TTAT) <sub>11</sub>                                                                       | (TTAT) <sub>12</sub>                                                                       | 38 | 1020 |
| DYS540 | (TTAT) <sub>12</sub>                                                                       | (TTAT) <sub>11</sub>                                                                       | 31 | 1134 |
| DYS541 | (TATC) <sub>12</sub> (TTC) <sub>1</sub> (TATC) <sub>3</sub>                                | (TATC) <sub>13</sub> (TTC) <sub>1</sub> (TATC) <sub>3</sub>                                | 34 | 151  |
| DYS541 | (TATC) <sub>12</sub> (TTC) <sub>1</sub> (TATC) <sub>3</sub>                                | (TATC) <sub>11</sub> (TTC) <sub>1</sub> (TATC) <sub>3</sub>                                | 34 | 239  |
| DYS541 | (TATC) <sub>14</sub> (TTC) <sub>1</sub> (TATC) <sub>3</sub>                                | (TATC) <sub>13</sub> (TTC) <sub>1</sub> (TATC) <sub>3</sub>                                | 33 | 339  |
| DYS541 | (TATC) <sub>13</sub> (TTC) <sub>1</sub> (TATC) <sub>3</sub>                                | (TATC) <sub>12</sub> (TTC) <sub>1</sub> (TATC) <sub>3</sub>                                | 36 | 733  |
| DYS541 | (TATC) <sub>14</sub> (TTC) <sub>1</sub> (TATC) <sub>3</sub>                                | (TATC) <sub>13</sub> (TTC) <sub>1</sub> (TATC) <sub>3</sub>                                | 25 | 1415 |
| DYS541 | (TATC) <sub>12</sub> (TTC) <sub>1</sub> (TATC) <sub>3</sub>                                | (TATC) <sub>13</sub> (TTC) <sub>1</sub> (TATC) <sub>3</sub>                                | 64 | 1843 |

|        |                                                                                                                                                                                                     |                                                                                                                                                                                                     |         |      |
|--------|-----------------------------------------------------------------------------------------------------------------------------------------------------------------------------------------------------|-----------------------------------------------------------------------------------------------------------------------------------------------------------------------------------------------------|---------|------|
| DYS543 | (AGAT) <sub>3</sub> (GATA) <sub>11</sub> N <sub>42</sub> (ATGT) <sub>4</sub> (ATGG) <sub>2</sub> N <sub>35</sub> (GAAA) <sub>3</sub>                                                                | (AGAT) <sub>3</sub> (GATA) <sub>12</sub> N <sub>42</sub> (ATGT) <sub>4</sub> (ATGG) <sub>2</sub> N <sub>35</sub> (GAAA) <sub>3</sub>                                                                | 23      | 16   |
| DYS543 | (AGAT) <sub>3</sub> (GATA) <sub>15</sub> N <sub>42</sub> (ATGT) <sub>3</sub> (ATGG) <sub>3</sub> N <sub>35</sub> (GAAA) <sub>3</sub>                                                                | (AGAT) <sub>3</sub> (GATA) <sub>14</sub> N <sub>42</sub> (ATGT) <sub>3</sub> (ATGG) <sub>3</sub> N <sub>35</sub> (GAAA) <sub>3</sub>                                                                | 40      | 774  |
| DYS543 | (AGAT) <sub>3</sub> (GATA) <sub>15</sub> N <sub>42</sub> (ATGT) <sub>3</sub> (ATGG) <sub>3</sub> N <sub>35</sub> (GAAA) <sub>3</sub>                                                                | (AGAT) <sub>3</sub> (GATA) <sub>14</sub> N <sub>42</sub> (ATGT) <sub>3</sub> (ATGG) <sub>3</sub> N <sub>35</sub> (GAAA) <sub>3</sub>                                                                | 33      | 844  |
| DYS543 | (AGAT) <sub>3</sub> (GATA) <sub>12</sub> N <sub>42</sub> (ATGT) <sub>4</sub> (ATGG) <sub>2</sub> N <sub>35</sub> (GAAA) <sub>3</sub>                                                                | (AGAT) <sub>3</sub> (GATA) <sub>11</sub> N <sub>42</sub> (ATGT) <sub>4</sub> (ATGG) <sub>2</sub> N <sub>35</sub> (GAAA) <sub>3</sub>                                                                | 43      | 939  |
| DYS543 | (AGAT) <sub>3</sub> (GATA) <sub>13</sub> N <sub>42</sub> (ATGT) <sub>3</sub> (ATGG) <sub>3</sub> N <sub>35</sub> (GAAA) <sub>3</sub>                                                                | (AGAT) <sub>3</sub> (GATA) <sub>14</sub> N <sub>42</sub> (ATGT) <sub>3</sub> (ATGG) <sub>3</sub> N <sub>35</sub> (GAAA) <sub>3</sub>                                                                | 42      | 1054 |
| DYS543 | (AGAT) <sub>3</sub> (GATA) <sub>15</sub> N <sub>42</sub> (ATGT) <sub>3</sub> (ATGG) <sub>3</sub> N <sub>35</sub> (GAAA) <sub>3</sub>                                                                | (AGAT) <sub>3</sub> (GATA) <sub>16</sub> N <sub>42</sub> (ATGT) <sub>3</sub> (ATGG) <sub>3</sub> N <sub>35</sub> (GAAA) <sub>3</sub>                                                                | Unknown | 1063 |
| DYS543 | (AGAT) <sub>3</sub> (GATA) <sub>13</sub> N <sub>42</sub> (ATGT) <sub>4</sub> (ATGG) <sub>2</sub> N <sub>35</sub> (GAAA) <sub>3</sub>                                                                | (AGAT) <sub>3</sub> (GATA) <sub>12</sub> N <sub>42</sub> (ATGT) <sub>4</sub> (ATGG) <sub>2</sub> N <sub>35</sub> (GAAA) <sub>3</sub>                                                                | Unknown | 1223 |
| DYS543 | (AGAT) <sub>3</sub> (GATA) <sub>15</sub> N <sub>42</sub> (ATGT) <sub>3</sub> (ATGG) <sub>3</sub> N <sub>35</sub> (GAAA) <sub>3</sub>                                                                | (AGAT) <sub>3</sub> (GATA) <sub>14</sub> N <sub>42</sub> (ATGT) <sub>3</sub> (ATGG) <sub>3</sub> N <sub>35</sub> (GAAA) <sub>3</sub>                                                                | 31      | 1229 |
| DYS543 | (AGAT) <sub>3</sub> (GATA) <sub>13</sub> N <sub>42</sub> (ATGT) <sub>3</sub> (ATGG) <sub>3</sub> N <sub>35</sub> (GAAA) <sub>3</sub>                                                                | (AGAT) <sub>3</sub> (GATA) <sub>12</sub> N <sub>42</sub> (ATGT) <sub>3</sub> (ATGG) <sub>3</sub> N <sub>35</sub> (GAAA) <sub>3</sub>                                                                | 31      | 1315 |
| DYS543 | (AGAT) <sub>3</sub> (GATA) <sub>11</sub> N <sub>42</sub> (ATGT) <sub>4</sub> (ATGG) <sub>2</sub> N <sub>35</sub> (GAAA) <sub>3</sub>                                                                | (AGAT) <sub>3</sub> (GATA) <sub>12</sub> N <sub>42</sub> (ATGT) <sub>4</sub> (ATGG) <sub>2</sub> N <sub>35</sub> (GAAA) <sub>3</sub>                                                                | Unknown | 1591 |
| DYS543 | (AGAT) <sub>3</sub> (GATA) <sub>13</sub> N <sub>42</sub> (ATGT) <sub>4</sub> (ATGG) <sub>2</sub> N <sub>35</sub> (GAAA) <sub>3</sub>                                                                | (AGAT) <sub>3</sub> (GATA) <sub>12</sub> N <sub>42</sub> (ATGT) <sub>4</sub> (ATGG) <sub>2</sub> N <sub>35</sub> (GAAA) <sub>3</sub>                                                                | 28      | 1712 |
| DYS546 | (TTCC) <sub>3</sub> N <sub>23</sub> (TTCT) <sub>3</sub> N <sub>33</sub> (TTCC) <sub>3</sub> N <sub>16</sub> (TTCT) <sub>17</sub>                                                                    | (TTCC) <sub>3</sub> N <sub>23</sub> (TTCT) <sub>3</sub> N <sub>33</sub> (TTCC) <sub>3</sub> N <sub>16</sub> (TTCT) <sub>18</sub>                                                                    | 34      | 371  |
| DYS546 | (TTCC) <sub>3</sub> N <sub>23</sub> (TTCT) <sub>3</sub> N <sub>33</sub> (TTCC) <sub>3</sub> N <sub>16</sub> (TTCT) <sub>14</sub>                                                                    | (TTCC) <sub>3</sub> N <sub>23</sub> (TTCT) <sub>3</sub> N <sub>33</sub> (TTCC) <sub>3</sub> N <sub>16</sub> (TTCT) <sub>13</sub>                                                                    | 20      | 706  |
| DYS546 | (TTCC) <sub>3</sub> N <sub>23</sub> (TTCT) <sub>3</sub> N <sub>33</sub> (TTCC) <sub>3</sub> N <sub>16</sub> (TTCT) <sub>16</sub>                                                                    | (TTCC) <sub>3</sub> N <sub>23</sub> (TTCT) <sub>3</sub> N <sub>33</sub> (TTCC) <sub>3</sub> N <sub>16</sub> (TTCT) <sub>17</sub>                                                                    | 20      | 756  |
| DYS546 | (TTCC) <sub>3</sub> N <sub>23</sub> (TTCT) <sub>3</sub> N <sub>33</sub> (TTCC) <sub>3</sub> N <sub>16</sub> (TTCT) <sub>17</sub>                                                                    | (TTCC) <sub>3</sub> N <sub>23</sub> (TTCT) <sub>3</sub> N <sub>33</sub> (TTCC) <sub>3</sub> N <sub>16</sub> (TTCT) <sub>16</sub>                                                                    | 31      | 878  |
| DYS546 | (TTCC) <sub>3</sub> N <sub>23</sub> (TTCT) <sub>3</sub> N <sub>33</sub> (TTCC) <sub>3</sub> N <sub>16</sub> (TTCT) <sub>18</sub>                                                                    | (TTCC) <sub>3</sub> N <sub>23</sub> (TTCT) <sub>3</sub> N <sub>33</sub> (TTCC) <sub>3</sub> N <sub>16</sub> (TTCT) <sub>17</sub>                                                                    | 23      | 1119 |
| DYS546 | (TTCC) <sub>3</sub> N <sub>23</sub> (TTCT) <sub>3</sub> N <sub>33</sub> (TTCC) <sub>3</sub> N <sub>16</sub> (TTCT) <sub>16</sub>                                                                    | (TTCC) <sub>3</sub> N <sub>23</sub> (TTCT) <sub>3</sub> N <sub>33</sub> (TTCC) <sub>3</sub> N <sub>16</sub> (TTCT) <sub>14</sub>                                                                    | 55      | 1840 |
| DYS547 | (CCTT) <sub>10</sub> T(C TTC) <sub>5</sub> N <sub>56</sub> (TTTC) <sub>16</sub> N <sub>10</sub> (CCTT) <sub>4</sub><br>(TCTC) <sub>1</sub> (TTTC) <sub>11</sub> N <sub>14</sub> (TTTC) <sub>3</sub> | (CCTT) <sub>10</sub> T(C TTC) <sub>5</sub> N <sub>56</sub> (TTTC) <sub>17</sub> N <sub>10</sub> (CCTT) <sub>4</sub><br>(TCTC) <sub>1</sub> (TTTC) <sub>11</sub> N <sub>14</sub> (TTTC) <sub>3</sub> | 28      | 1    |
| DYS547 | (CCTT) <sub>12</sub> T(C TTC) <sub>4</sub> N <sub>56</sub> (TTTC) <sub>15</sub> N <sub>10</sub> (CCTT) <sub>4</sub><br>(TCTC) <sub>1</sub> (TTTC) <sub>12</sub> N <sub>14</sub> (TTTC) <sub>3</sub> | (CCTT) <sub>12</sub> T(C TTC) <sub>4</sub> N <sub>56</sub> (TTTC) <sub>15</sub> N <sub>10</sub> (CCTT) <sub>4</sub><br>(TCTC) <sub>1</sub> (TTTC) <sub>13</sub> N <sub>14</sub> (TTTC) <sub>3</sub> | 46      | 10   |
| DYS547 | (CCTT) <sub>11</sub> T(C TTC) <sub>5</sub> N <sub>56</sub> (TTTC) <sub>17</sub> N <sub>10</sub> (CCTT) <sub>4</sub><br>(TCTC) <sub>1</sub> (TTTC) <sub>14</sub> N <sub>14</sub> (TTTC) <sub>3</sub> | (CCTT) <sub>11</sub> T(C TTC) <sub>5</sub> N <sub>56</sub> (TTTC) <sub>18</sub> N <sub>10</sub> (CCTT) <sub>4</sub><br>(TCTC) <sub>1</sub> (TTTC) <sub>14</sub> N <sub>14</sub> (TTTC) <sub>3</sub> | 59      | 152  |
| DYS547 | (CCTT) <sub>13</sub> T(C TTC) <sub>5</sub> N <sub>56</sub> (TTTC) <sub>16</sub> N <sub>10</sub> (CCTT) <sub>4</sub><br>(TCTC) <sub>1</sub> (TTTC) <sub>13</sub> N <sub>14</sub> (TTTC) <sub>3</sub> | (CCTT) <sub>12</sub> T(C TTC) <sub>5</sub> N <sub>56</sub> (TTTC) <sub>16</sub> N <sub>10</sub> (CCTT) <sub>4</sub><br>(TCTC) <sub>1</sub> (TTTC) <sub>13</sub> N <sub>14</sub> (TTTC) <sub>3</sub> | 34      | 243  |
| DYS547 | (CCTT) <sub>13</sub> T(C TTC) <sub>5</sub> N <sub>56</sub> (TTTC) <sub>14</sub> N <sub>10</sub> (CCTT) <sub>4</sub><br>(TCTC) <sub>1</sub> (TTTC) <sub>12</sub> N <sub>14</sub> (TTTC) <sub>3</sub> | (CCTT) <sub>13</sub> T(C TTC) <sub>5</sub> N <sub>56</sub> (TTTC) <sub>14</sub> N <sub>10</sub> (CCTT) <sub>4</sub><br>(TCTC) <sub>1</sub> (TTTC) <sub>11</sub> N <sub>14</sub> (TTTC) <sub>3</sub> | 31      | 268  |
| DYS547 | (CCTT) <sub>12</sub> T(C TTC) <sub>4</sub> N <sub>56</sub> (TTTC) <sub>17</sub> N <sub>10</sub> (CCTT) <sub>4</sub><br>(TCTC) <sub>1</sub> (TTTC) <sub>12</sub> N <sub>14</sub> (TTTC) <sub>3</sub> | (CCTT) <sub>12</sub> T(C TTC) <sub>4</sub> N <sub>56</sub> (TTTC) <sub>17</sub> N <sub>10</sub> (CCTT) <sub>4</sub><br>(TCTC) <sub>1</sub> (TTTC) <sub>11</sub> N <sub>14</sub> (TTTC) <sub>3</sub> | 50      | 270  |
| DYS547 | (CCTT) <sub>10</sub> T(C TTC) <sub>5</sub> N <sub>56</sub> (TTTC) <sub>18</sub> N <sub>10</sub> (CCTT) <sub>4</sub><br>(TCTC) <sub>1</sub> (TTTC) <sub>10</sub> N <sub>14</sub> (TTTC) <sub>3</sub> | (CCTT) <sub>10</sub> T(C TTC) <sub>5</sub> N <sub>56</sub> (TTTC) <sub>19</sub> N <sub>10</sub> (CCTT) <sub>4</sub><br>(TCTC) <sub>1</sub> (TTTC) <sub>10</sub> N <sub>14</sub> (TTTC) <sub>3</sub> | 33      | 339  |
| DYS547 | (CCTT) <sub>12</sub> T(C TTC) <sub>5</sub> N <sub>56</sub> (TTTC) <sub>17</sub> N <sub>10</sub> (CCTT) <sub>4</sub><br>(TCTC) <sub>1</sub> (TTTC) <sub>11</sub> N <sub>14</sub> (TTTC) <sub>3</sub> | (CCTT) <sub>12</sub> T(C TTC) <sub>5</sub> N <sub>56</sub> (TTTC) <sub>17</sub> N <sub>10</sub> (CCTT) <sub>4</sub><br>(TCTC) <sub>1</sub> (TTTC) <sub>10</sub> N <sub>14</sub> (TTTC) <sub>3</sub> | 36      | 378  |
| DYS547 | (CCTT) <sub>13</sub> T(C TTC) <sub>4</sub> N <sub>56</sub> (TTTC) <sub>16</sub> N <sub>10</sub> (CCTT) <sub>4</sub>                                                                                 | (CCTT) <sub>13</sub> T(C TTC) <sub>4</sub> N <sub>56</sub> (TTTC) <sub>17</sub> N <sub>10</sub> (CCTT) <sub>4</sub>                                                                                 | 28      | 425  |

|        |                                                                                              |                                                                                              |    |      |
|--------|----------------------------------------------------------------------------------------------|----------------------------------------------------------------------------------------------|----|------|
|        | $(TCTC)_1(TTTC)_{12}N_{14}(TTTC)_3$                                                          | $(TCTC)_1(TTTC)_{12}N_{14}(TTTC)_3$                                                          |    |      |
| DYS547 | $(CCTT)_{13}T(CTTC)_5N_{56}(TTTC)_{16}N_{10}(CCTT)_4$<br>$(TCTC)_1(TTTC)_{11}N_{14}(TTTC)_3$ | $(CCTT)_{13}T(CTTC)_5N_{56}(TTTC)_{18}N_{10}(CCTT)_4$<br>$(TCTC)_1(TTTC)_{11}N_{14}(TTTC)_3$ | 28 | 484  |
| DYS547 | $(CCTT)_{12}T(CTTC)_4N_{56}(TTTC)_{17}N_{10}(CCTT)_4$<br>$(TCTC)_1(TTTC)_{12}N_{14}(TTTC)_3$ | $(CCTT)_{12}T(CTTC)_4N_{56}(TTTC)_{16}N_{10}(CCTT)_4$<br>$(TCTC)_1(TTTC)_{12}N_{14}(TTTC)_3$ | 31 | 613  |
| DYS547 | $(CCTT)_{12}T(CTTC)_4N_{56}(TTTC)_{15}N_{10}(CCTT)_4$<br>$(TCTC)_1(TTTC)_{12}N_{14}(TTTC)_3$ | $(CCTT)_{12}T(CTTC)_4N_{56}(TTTC)_{15}N_{10}(CCTT)_4$<br>$(TCTC)_1(TTTC)_{11}N_{14}(TTTC)_3$ | 39 | 654  |
| DYS547 | $(CCTT)_{12}T(CTTC)_5N_{56}(TTTC)_{15}N_{10}(CCTT)_4$<br>$(TCTC)_1(TTTC)_{12}N_{14}(TTTC)_3$ | $(CCTT)_{12}T(CTTC)_5N_{56}(TTTC)_{14}N_{10}(CCTT)_4$<br>$(TCTC)_1(TTTC)_{12}N_{14}(TTTC)_3$ | 27 | 710  |
| DYS547 | $(CCTT)_{13}T(CTTC)_5N_{56}(TTTC)_{15}N_{10}(CCTT)_4$<br>$(TCTC)_1(TTTC)_{11}N_{14}(TTTC)_3$ | $(CCTT)_{13}T(CTTC)_5N_{56}(TTTC)_{14}N_{10}(CCTT)_4$<br>$(TCTC)_1(TTTC)_{11}N_{14}(TTTC)_3$ | 25 | 711  |
| DYS547 | $(CCTT)_{10}T(CTTC)_5N_{56}(TTTC)_{18}N_{10}(CCTT)_4$<br>$(TCTC)_1(TTTC)_{10}N_{14}(TTTC)_3$ | $(CCTT)_{10}T(CTTC)_5N_{56}(TTTC)_{17}N_{10}(CCTT)_4$<br>$(TCTC)_1(TTTC)_{10}N_{14}(TTTC)_3$ | 59 | 846  |
| DYS547 | $(CCTT)_{12}T(CTTC)_4N_{56}(TTTC)_{16}N_{10}(CCTT)_4$<br>$(TCTC)_1(TTTC)_{12}N_{14}(TTTC)_3$ | $(CCTT)_{12}T(CTTC)_4N_{56}(TTTC)_{17}N_{10}(CCTT)_4$<br>$(TCTC)_1(TTTC)_{12}N_{14}(TTTC)_3$ | 37 | 904  |
| DYS547 | $(CCTT)_{12}T(CTTC)_4N_{56}(TTTC)_{18}N_{10}(CCTT)_4$<br>$(TCTC)_1(TTTC)_{13}N_{14}(TTTC)_3$ | $(CCTT)_{12}T(CTTC)_4N_{56}(TTTC)_{19}N_{10}(CCTT)_4$<br>$(TCTC)_1(TTTC)_{13}N_{14}(TTTC)_3$ | 22 | 986  |
| DYS547 | $(CCTT)_{12}T(CTTC)_5N_{56}(TTTC)_{22}N_{10}(CCTT)_4$<br>$(TCTC)_1(TTTC)_9N_{14}(TTTC)_3$    | $(CCTT)_{12}T(CTTC)_5N_{56}(TTTC)_{21}N_{10}(CCTT)_4$<br>$(TCTC)_1(TTTC)_9N_{14}(TTTC)_3$    | 55 | 1022 |
| DYS547 | $(CCTT)_{12}T(CTTC)_4N_{56}(TTTC)_{16}N_{10}(CCTT)_4$<br>$(TCTC)_1(TTTC)_{13}N_{14}(TTTC)_3$ | $(CCTT)_{12}T(CTTC)_4N_{56}(TTTC)_{16}N_{10}(CCTT)_4$<br>$(TCTC)_1(TTTC)_{14}N_{14}(TTTC)_3$ | 43 | 1153 |
| DYS547 | $(CCTT)_{12}T(CTTC)_4N_{56}(TTTC)_{19}N_{10}(CCTT)_4$<br>$(TCTC)_1(TTTC)_{12}N_{14}(TTTC)_3$ | $(CCTT)_{12}T(CTTC)_4N_{56}(TTTC)_{18}N_{10}(CCTT)_4$<br>$(TCTC)_1(TTTC)_{12}N_{14}(TTTC)_3$ | 31 | 1229 |
| DYS547 | $(CCTT)_{12}T(CTTC)_4N_{56}(TTTC)_{16}N_{10}(CCTT)_4$<br>$(TCTC)_1(TTTC)_{13}N_{14}(TTTC)_3$ | $(CCTT)_{12}T(CTTC)_4N_{56}(TTTC)_{16}N_{10}(CCTT)_4$<br>$(TCTC)_1(TTTC)_{14}N_{14}(TTTC)_3$ | 29 | 1276 |
| DYS547 | $(CCTT)_{12}T(CTTC)_4N_{56}(TTTC)_{18}N_{10}(CCTT)_4$<br>$(TCTC)_1(TTTC)_{12}N_{14}(TTTC)_3$ | $(CCTT)_{12}T(CTTC)_4N_{56}(TTTC)_{19}N_{10}(CCTT)_4$<br>$(TCTC)_1(TTTC)_{12}N_{14}(TTTC)_3$ | 28 | 1294 |
| DYS547 | $(CCTT)_{11}T(CTTC)_4N_{56}(TTTC)_{16}N_{10}(CCTT)_4$<br>$(TCTC)_1(TTTC)_{12}N_{14}(TTTC)_3$ | $(CCTT)_{11}T(CTTC)_4N_{56}(TTTC)_{16}N_{10}(CCTT)_4$<br>$(TCTC)_1(TTTC)_{13}N_{14}(TTTC)_3$ | 30 | 1297 |
| DYS547 | $(CCTT)_{11}T(CTTC)_5N_{56}(TTTC)_{15}N_{10}(CCTT)_4$<br>$(TCTC)_1(TTTC)_{11}N_{14}(TTTC)_3$ | $(CCTT)_{11}T(CTTC)_5N_{56}(TTTC)_{15}N_{10}(CCTT)_4$<br>$(TCTC)_1(TTTC)_{12}N_{14}(TTTC)_3$ | 32 | 1321 |
| DYS547 | $(CCTT)_{12}T(CTTC)_5N_{56}(TTTC)_{15}N_{10}(CCTT)_4$<br>$(TCTC)_1(TTTC)_{12}N_{14}(TTTC)_3$ | $(CCTT)_{12}T(CTTC)_5N_{56}(TTTC)_{15}N_{10}(CCTT)_4$<br>$(TCTC)_1(TTTC)_{13}N_{14}(TTTC)_3$ | 41 | 1379 |
| DYS547 | $(CCTT)_{10}T(CTTC)_5N_{56}(TTTC)_{18}N_{10}(CCTT)_4$<br>$(TCTC)_1(TTTC)_{10}N_{14}(TTTC)_3$ | $(CCTT)_{10}T(CTTC)_5N_{56}(TTTC)_{19}N_{10}(CCTT)_4$<br>$(TCTC)_1(TTTC)_{10}N_{14}(TTTC)_3$ | 24 | 1466 |
| DYS547 | $(CCTT)_{10}T(CTTC)_5N_{56}(TTTC)_{16}N_{10}(CCTT)_4$<br>$(TCTC)_1(TTTC)_{10}N_{14}(TTTC)_3$ | $(CCTT)_{10}T(CTTC)_5N_{56}(TTTC)_{16}N_{10}(CCTT)_4$<br>$(TCTC)_1(TTTC)_{11}N_{14}(TTTC)_3$ | 42 | 1485 |
| DYS547 | $(CCTT)_{12}T(CTTC)_5N_{56}(TTTC)_{15}N_{10}(CCTT)_4$                                        | $(CCTT)_{12}T(CTTC)_5N_{56}(TTTC)_{16}N_{10}(CCTT)_4$                                        | 29 | 1491 |

|        |                                                                                                                                                                                                    |                                                                                                                                                                                                    |         |      |
|--------|----------------------------------------------------------------------------------------------------------------------------------------------------------------------------------------------------|----------------------------------------------------------------------------------------------------------------------------------------------------------------------------------------------------|---------|------|
|        | (TCTC) <sub>1</sub> (TTTC) <sub>13</sub> N <sub>14</sub> (TTTC) <sub>3</sub>                                                                                                                       | (TCTC) <sub>1</sub> (TTTC) <sub>13</sub> N <sub>14</sub> (TTTC) <sub>3</sub>                                                                                                                       |         |      |
| DYS547 | (CCTT) <sub>12</sub> T(CTTC) <sub>4</sub> N <sub>56</sub> (TTTC) <sub>16</sub> N <sub>10</sub> (CCTT) <sub>4</sub><br>(TCTC) <sub>1</sub> (TTTC) <sub>12</sub> N <sub>14</sub> (TTTC) <sub>3</sub> | (CCTT) <sub>12</sub> T(CTTC) <sub>4</sub> N <sub>56</sub> (TTTC) <sub>17</sub> N <sub>10</sub> (CCTT) <sub>4</sub><br>(TCTC) <sub>1</sub> (TTTC) <sub>12</sub> N <sub>14</sub> (TTTC) <sub>3</sub> | 23      | 1510 |
| DYS547 | (CCTT) <sub>12</sub> T(CTTC) <sub>5</sub> N <sub>56</sub> (TTTC) <sub>16</sub> N <sub>10</sub> (CCTT) <sub>4</sub><br>(TCTC) <sub>1</sub> (TTTC) <sub>11</sub> N <sub>14</sub> (TTTC) <sub>3</sub> | (CCTT) <sub>12</sub> T(CTTC) <sub>5</sub> N <sub>56</sub> (TTTC) <sub>16</sub> N <sub>10</sub> (CCTT) <sub>4</sub><br>(TCTC) <sub>1</sub> (TTTC) <sub>10</sub> N <sub>14</sub> (TTTC) <sub>3</sub> | 38      | 1524 |
| DYS547 | (CCTT) <sub>12</sub> T(CTTC) <sub>5</sub> N <sub>56</sub> (TTTC) <sub>10</sub> N <sub>10</sub> (CCTT) <sub>4</sub><br>(TCTC) <sub>1</sub> (TTTC) <sub>17</sub> N <sub>14</sub> (TTTC) <sub>3</sub> | (CCTT) <sub>12</sub> T(CTTC) <sub>5</sub> N <sub>56</sub> (TTTC) <sub>10</sub> N <sub>10</sub> (CCTT) <sub>4</sub><br>(TCTC) <sub>1</sub> (TTTC) <sub>16</sub> N <sub>14</sub> (TTTC) <sub>3</sub> | 36      | 1582 |
| DYS547 | (CCTT) <sub>12</sub> T(CTTC) <sub>5</sub> N <sub>56</sub> (TTTC) <sub>16</sub> N <sub>10</sub> (CCTT) <sub>4</sub><br>(TCTC) <sub>1</sub> (TTTC) <sub>13</sub> N <sub>14</sub> (TTTC) <sub>3</sub> | (CCTT) <sub>12</sub> T(CTTC) <sub>5</sub> N <sub>56</sub> (TTTC) <sub>17</sub> N <sub>10</sub> (CCTT) <sub>4</sub><br>(TCTC) <sub>1</sub> (TTTC) <sub>13</sub> N <sub>14</sub> (TTTC) <sub>3</sub> | 28      | 1640 |
| DYS547 | (CCTT) <sub>12</sub> T(CTTC) <sub>4</sub> N <sub>56</sub> (TTTC) <sub>15</sub> N <sub>10</sub> (CCTT) <sub>4</sub><br>(TCTC) <sub>1</sub> (TTTC) <sub>12</sub> N <sub>14</sub> (TTTC) <sub>3</sub> | (CCTT) <sub>12</sub> T(CTTC) <sub>4</sub> N <sub>56</sub> (TTTC) <sub>14</sub> N <sub>10</sub> (CCTT) <sub>4</sub><br>(TCTC) <sub>1</sub> (TTTC) <sub>12</sub> N <sub>14</sub> (TTTC) <sub>3</sub> | 22      | 1648 |
| DYS547 | (CCTT) <sub>12</sub> T(CTTC) <sub>5</sub> N <sub>56</sub> (TTTC) <sub>16</sub> N <sub>10</sub> (CCTT) <sub>4</sub><br>(TCTC) <sub>1</sub> (TTTC) <sub>12</sub> N <sub>14</sub> (TTTC) <sub>3</sub> | (CCTT) <sub>12</sub> T(CTTC) <sub>5</sub> N <sub>56</sub> (TTTC) <sub>17</sub> N <sub>10</sub> (CCTT) <sub>4</sub><br>(TCTC) <sub>1</sub> (TTTC) <sub>12</sub> N <sub>14</sub> (TTTC) <sub>3</sub> | 37      | 1663 |
| DYS547 | (CCTT) <sub>12</sub> T(CTTC) <sub>4</sub> N <sub>56</sub> (TTTC) <sub>16</sub> N <sub>10</sub> (CCTT) <sub>4</sub><br>(TCTC) <sub>1</sub> (TTTC) <sub>12</sub> N <sub>14</sub> (TTTC) <sub>3</sub> | (CCTT) <sub>12</sub> T(CTTC) <sub>4</sub> N <sub>56</sub> (TTTC) <sub>17</sub> N <sub>10</sub> (CCTT) <sub>4</sub><br>(TCTC) <sub>1</sub> (TTTC) <sub>12</sub> N <sub>14</sub> (TTTC) <sub>3</sub> | Unknown | 1723 |
| DYS547 | (CCTT) <sub>12</sub> T(CTTC) <sub>5</sub> N <sub>56</sub> (TTTC) <sub>17</sub> N <sub>10</sub> (CCTT) <sub>4</sub><br>(TCTC) <sub>1</sub> (TTTC) <sub>12</sub> N <sub>14</sub> (TTTC) <sub>3</sub> | (CCTT) <sub>12</sub> T(CTTC) <sub>5</sub> N <sub>56</sub> (TTTC) <sub>16</sub> N <sub>10</sub> (CCTT) <sub>4</sub><br>(TCTC) <sub>1</sub> (TTTC) <sub>12</sub> N <sub>14</sub> (TTTC) <sub>3</sub> | 54      | 1860 |
| DYS547 | (CCTT) <sub>10</sub> T(CTTC) <sub>5</sub> N <sub>56</sub> (TTTC) <sub>16</sub> N <sub>10</sub> (CCTT) <sub>4</sub><br>(TCTC) <sub>1</sub> (TTTC) <sub>13</sub> N <sub>14</sub> (TTTC) <sub>3</sub> | (CCTT) <sub>10</sub> T(CTTC) <sub>5</sub> N <sub>56</sub> (TTTC) <sub>16</sub> N <sub>10</sub> (CCTT) <sub>4</sub><br>(TCTC) <sub>1</sub> (TTTC) <sub>12</sub> N <sub>14</sub> (TTTC) <sub>3</sub> | 53      | 1871 |
| DYS547 | (CCTT) <sub>12</sub> T(CTTC) <sub>5</sub> N <sub>56</sub> (TTTC) <sub>16</sub> N <sub>10</sub> (CCTT) <sub>4</sub><br>(TCTC) <sub>1</sub> (TTTC) <sub>11</sub> N <sub>14</sub> (TTTC) <sub>3</sub> | (CCTT) <sub>12</sub> T(CTTC) <sub>5</sub> N <sub>56</sub> (TTTC) <sub>15</sub> N <sub>10</sub> (CCTT) <sub>4</sub><br>(TCTC) <sub>1</sub> (TTTC) <sub>11</sub> N <sub>14</sub> (TTTC) <sub>3</sub> | 55      | 1910 |
| DYS547 | (CCTT) <sub>12</sub> T(CTTC) <sub>5</sub> N <sub>56</sub> (TTTC) <sub>14</sub> N <sub>10</sub> (CCTT) <sub>4</sub><br>(TCTC) <sub>1</sub> (TTTC) <sub>11</sub> N <sub>14</sub> (TTTC) <sub>3</sub> | (CCTT) <sub>12</sub> T(CTTC) <sub>5</sub> N <sub>56</sub> (TTTC) <sub>14</sub> N <sub>10</sub> (CCTT) <sub>4</sub><br>(TCTC) <sub>1</sub> (TTTC) <sub>12</sub> N <sub>14</sub> (TTTC) <sub>3</sub> | 65      | 1920 |
| DYS549 | (GATA) <sub>13</sub>                                                                                                                                                                               | (GATA) <sub>12</sub>                                                                                                                                                                               | 30      | 87   |
| DYS549 | (GATA) <sub>13</sub>                                                                                                                                                                               | (GATA) <sub>12</sub>                                                                                                                                                                               | 47      | 113  |
| DYS549 | (GATA) <sub>12</sub>                                                                                                                                                                               | (GATA) <sub>11</sub>                                                                                                                                                                               | 27      | 119  |
| DYS549 | (GATA) <sub>12</sub>                                                                                                                                                                               | (GATA) <sub>13</sub>                                                                                                                                                                               | 38      | 336  |
| DYS549 | (GATA) <sub>14</sub>                                                                                                                                                                               | (GATA) <sub>13</sub>                                                                                                                                                                               | 43      | 472  |
| DYS549 | (GATA) <sub>12</sub>                                                                                                                                                                               | (GATA) <sub>11</sub>                                                                                                                                                                               | 25      | 517  |
| DYS549 | (GATA) <sub>12</sub>                                                                                                                                                                               | (GATA) <sub>11</sub>                                                                                                                                                                               | 22      | 625  |
| DYS551 | (AGAT) <sub>15</sub> N <sub>8</sub> (AGAC) <sub>3</sub> (AGGT) <sub>1</sub> (AGAT) <sub>4</sub>                                                                                                    | (AGAT) <sub>14</sub> N <sub>8</sub> (AGAC) <sub>3</sub> (AGGT) <sub>1</sub> (AGAT) <sub>4</sub>                                                                                                    | 21      | 436  |
| DYS551 | (AGAT) <sub>14</sub> N <sub>8</sub> (AGAC) <sub>3</sub> (AGGT) <sub>1</sub> (AGAT) <sub>4</sub>                                                                                                    | (AGAT) <sub>13</sub> N <sub>8</sub> (AGAC) <sub>3</sub> (AGGT) <sub>1</sub> (AGAT) <sub>4</sub>                                                                                                    | 22      | 604  |
| DYS551 | (AGAT) <sub>15</sub> N <sub>8</sub> (AGAC) <sub>3</sub> (AGGT) <sub>1</sub> (AGAT) <sub>4</sub>                                                                                                    | (AGAT) <sub>14</sub> N <sub>8</sub> (AGAC) <sub>3</sub> (AGGT) <sub>1</sub> (AGAT) <sub>4</sub>                                                                                                    | 41      | 862  |
| DYS551 | (AGAT) <sub>14</sub> N <sub>8</sub> (AGAC) <sub>3</sub> (AGGT) <sub>1</sub> (AGAT) <sub>4</sub>                                                                                                    | (AGAT) <sub>13</sub> N <sub>8</sub> (AGAC) <sub>3</sub> (AGGT) <sub>1</sub> (AGAT) <sub>4</sub>                                                                                                    | 51      | 1212 |
| DYS551 | (AGAT) <sub>13</sub> N <sub>8</sub> (AGAC) <sub>3</sub> (AGGT) <sub>1</sub> (AGAT) <sub>4</sub>                                                                                                    | (AGAT) <sub>14</sub> N <sub>8</sub> (AGAC) <sub>3</sub> (AGGT) <sub>1</sub> (AGAT) <sub>4</sub>                                                                                                    | 27      | 1671 |

|        |                                                                                                      |                                                                                                      |    |      |
|--------|------------------------------------------------------------------------------------------------------|------------------------------------------------------------------------------------------------------|----|------|
| DYS552 | (TCTA) <sub>3</sub> (TCTG) <sub>1</sub> (TCTA) <sub>9</sub> N <sub>40</sub> (TCTA) <sub>15</sub>     | (TCTA) <sub>3</sub> (TCTG) <sub>1</sub> (TCTA) <sub>7</sub> N <sub>40</sub> (TCTA) <sub>15</sub>     | 25 | 471  |
| DYS552 | (TCTA) <sub>3</sub> (TCTG) <sub>1</sub> (TCTA) <sub>10</sub> N <sub>40</sub> (TCTA) <sub>15</sub>    | (TCTA) <sub>3</sub> (TCTG) <sub>1</sub> (TCTA) <sub>10</sub> N <sub>40</sub> (TCTA) <sub>16</sub>    | 59 | 846  |
| DYS552 | (TCTA) <sub>3</sub> (TCTG) <sub>1</sub> (TCTA) <sub>10</sub> N <sub>40</sub> (TCTA) <sub>14</sub>    | (TCTA) <sub>3</sub> (TCTG) <sub>1</sub> (TCTA) <sub>10</sub> N <sub>40</sub> (TCTA) <sub>15</sub>    | 18 | 847  |
| DYS552 | (TCTA) <sub>3</sub> (TCTG) <sub>1</sub> (TCTA) <sub>11</sub> N <sub>40</sub> (TCTA) <sub>14</sub>    | (TCTA) <sub>3</sub> (TCTG) <sub>1</sub> (TCTA) <sub>12</sub> N <sub>40</sub> (TCTA) <sub>14</sub>    | 31 | 1486 |
| DYS554 | (TAAA) <sub>10</sub>                                                                                 | (TAAA) <sub>11</sub>                                                                                 | 37 | 1277 |
| DYS556 | (AAAT) <sub>12</sub>                                                                                 | (AAAT) <sub>11</sub>                                                                                 | 30 | 1101 |
| DYS556 | (AAAT) <sub>11</sub>                                                                                 | (AAAT) <sub>12</sub>                                                                                 | 21 | 1448 |
| DYS557 | (TTTC) <sub>4</sub> (TTCTC) <sub>1</sub> (TTTC) <sub>4</sub> (TTC) <sub>1</sub> (TTTC) <sub>16</sub> | (TTTC) <sub>4</sub> (TTCTC) <sub>1</sub> (TTTC) <sub>4</sub> (TTC) <sub>1</sub> (TTTC) <sub>15</sub> | 24 | 17   |
| DYS557 | (TTTC) <sub>4</sub> (TTCTC) <sub>1</sub> (TTTC) <sub>4</sub> (TTC) <sub>1</sub> (TTTC) <sub>16</sub> | (TTTC) <sub>4</sub> (TTCTC) <sub>1</sub> (TTTC) <sub>4</sub> (TTC) <sub>1</sub> (TTTC) <sub>15</sub> | 23 | 52   |
| DYS557 | (TTTC) <sub>4</sub> (TTCTC) <sub>1</sub> (TTTC) <sub>4</sub> (TTC) <sub>1</sub> (TTTC) <sub>15</sub> | (TTTC) <sub>4</sub> (TTCTC) <sub>1</sub> (TTTC) <sub>4</sub> (TTC) <sub>1</sub> (TTTC) <sub>16</sub> | 34 | 394  |
| DYS557 | (TTTC) <sub>4</sub> (TTCTC) <sub>1</sub> (TTTC) <sub>4</sub> (TTC) <sub>1</sub> (TTTC) <sub>15</sub> | (TTTC) <sub>4</sub> (TTCTC) <sub>1</sub> (TTTC) <sub>4</sub> (TTC) <sub>1</sub> (TTTC) <sub>16</sub> | 38 | 589  |
| DYS557 | (TTTC) <sub>4</sub> (TTCTC) <sub>1</sub> (TTTC) <sub>4</sub> (TTC) <sub>1</sub> (TTTC) <sub>17</sub> | (TTTC) <sub>4</sub> (TTCTC) <sub>1</sub> (TTTC) <sub>4</sub> (TTC) <sub>1</sub> (TTTC) <sub>16</sub> | 38 | 1494 |
| DYS557 | (TTTC) <sub>4</sub> (TTCTC) <sub>1</sub> (TTTC) <sub>4</sub> (TTC) <sub>1</sub> (TTTC) <sub>15</sub> | (TTTC) <sub>4</sub> (TTCTC) <sub>1</sub> (TTTC) <sub>4</sub> (TTC) <sub>1</sub> (TTTC) <sub>16</sub> | 17 | 1517 |
| DYS559 | (TAAA) <sub>9</sub>                                                                                  | (TAAA) <sub>8</sub>                                                                                  | 27 | 1357 |
| DYS561 | (GATA) <sub>13</sub> (GACA) <sub>4</sub>                                                             | (GATA) <sub>12</sub> (GACA) <sub>4</sub>                                                             | 34 | 359  |
| DYS565 | (ATAA) <sub>13</sub>                                                                                 | (ATAA) <sub>12</sub>                                                                                 | 34 | 101  |
| DYS565 | (ATAA) <sub>13</sub>                                                                                 | (ATAA) <sub>12</sub>                                                                                 | 43 | 624  |
| DYS565 | (ATAA) <sub>13</sub>                                                                                 | (ATAA) <sub>14</sub>                                                                                 | 27 | 1673 |
| DYS568 | (AAAT) <sub>12</sub>                                                                                 | (AAAT) <sub>13</sub>                                                                                 | 35 | 1547 |
| DYS569 | (ATTT) <sub>12</sub>                                                                                 | (ATTT) <sub>11</sub>                                                                                 | 31 | 598  |
| DYS569 | (ATTT) <sub>12</sub>                                                                                 | (ATTT) <sub>11</sub>                                                                                 | 21 | 1053 |
| DYS570 | (TTTC) <sub>17</sub>                                                                                 | (TTTC) <sub>16</sub>                                                                                 | 34 | 92   |
| DYS570 | (TTTC) <sub>19</sub>                                                                                 | (TTTC) <sub>20</sub>                                                                                 | 39 | 112  |
| DYS570 | (TTTC) <sub>19</sub>                                                                                 | (TTTC) <sub>18</sub>                                                                                 | 20 | 240  |
| DYS570 | (TTTC) <sub>20</sub>                                                                                 | (TTTC) <sub>19</sub>                                                                                 | 37 | 293  |
| DYS570 | (TTTC) <sub>17</sub>                                                                                 | (TTTC) <sub>18</sub>                                                                                 | 41 | 313  |
| DYS570 | (TTTC) <sub>19</sub>                                                                                 | (TTTC) <sub>17</sub>                                                                                 | 16 | 316  |
| DYS570 | (TTTC) <sub>19</sub>                                                                                 | (TTTC) <sub>18</sub>                                                                                 | 25 | 317  |
| DYS570 | (TTTC) <sub>20</sub>                                                                                 | (TTTC) <sub>21</sub>                                                                                 | 32 | 614  |
| DYS570 | (TTTC) <sub>20</sub>                                                                                 | (TTTC) <sub>21</sub>                                                                                 | 24 | 855  |

|        |                      |                      |         |      |
|--------|----------------------|----------------------|---------|------|
| DYS570 | (TTTC) <sub>20</sub> | (TTTC) <sub>19</sub> | 30      | 867  |
| DYS570 | (TTTC) <sub>21</sub> | (TTTC) <sub>22</sub> | 22      | 922  |
| DYS570 | (TTTC) <sub>18</sub> | (TTTC) <sub>19</sub> | 36      | 1061 |
| DYS570 | (TTTC) <sub>19</sub> | (TTTC) <sub>20</sub> | 20      | 1253 |
| DYS570 | (TTTC) <sub>16</sub> | (TTTC) <sub>15</sub> | 41      | 1256 |
| DYS570 | (TTTC) <sub>21</sub> | (TTTC) <sub>20</sub> | 45      | 1364 |
| DYS570 | (TTTC) <sub>17</sub> | (TTTC) <sub>18</sub> | 54      | 1895 |
| DYS570 | (TTTC) <sub>19</sub> | (TTTC) <sub>18</sub> | 66      | 1901 |
| DYS572 | (AAAT) <sub>11</sub> | (AAAT) <sub>10</sub> | 35      | 735  |
| DYS572 | (AAAT) <sub>11</sub> | (AAAT) <sub>10</sub> | 24      | 1342 |
| DYS572 | (AAAT) <sub>11</sub> | (AAAT) <sub>10</sub> | 28      | 1696 |
| DYS574 | (TTAT) <sub>10</sub> | (TTAT) <sub>9</sub>  | 43      | 1818 |
| DYS576 | (AAAG) <sub>17</sub> | (AAAG) <sub>18</sub> | 28      | 153  |
| DYS576 | (AAAG) <sub>19</sub> | (AAAG) <sub>18</sub> | 34      | 236  |
| DYS576 | (AAAG) <sub>17</sub> | (AAAG) <sub>18</sub> | 34      | 243  |
| DYS576 | (AAAG) <sub>18</sub> | (AAAG) <sub>17</sub> | 47      | 347  |
| DYS576 | (AAAG) <sub>19</sub> | (AAAG) <sub>18</sub> | 17      | 635  |
| DYS576 | (AAAG) <sub>19</sub> | (AAAG) <sub>18</sub> | 37      | 715  |
| DYS576 | (AAAG) <sub>20</sub> | (AAAG) <sub>21</sub> | 23      | 716  |
| DYS576 | (AAAG) <sub>18</sub> | (AAAG) <sub>17</sub> | 38      | 719  |
| DYS576 | (AAAG) <sub>20</sub> | (AAAG) <sub>21</sub> | 29      | 789  |
| DYS576 | (AAAG) <sub>20</sub> | (AAAG) <sub>19</sub> | 50      | 884  |
| DYS576 | (AAAG) <sub>17</sub> | (AAAG) <sub>18</sub> | 42      | 1054 |
| DYS576 | (AAAG) <sub>19</sub> | (AAAG) <sub>18</sub> | 36      | 1061 |
| DYS576 | (AAAG) <sub>18</sub> | (AAAG) <sub>19</sub> | Unknown | 1200 |
| DYS576 | (AAAG) <sub>18</sub> | (AAAG) <sub>19</sub> | 40      | 1204 |
| DYS576 | (AAAG) <sub>18</sub> | (AAAG) <sub>19</sub> | 51      | 1212 |
| DYS576 | (AAAG) <sub>18</sub> | (AAAG) <sub>17</sub> | Unknown | 1224 |
| DYS576 | (AAAG) <sub>18</sub> | (AAAG) <sub>19</sub> | Unknown | 1265 |
| DYS576 | (AAAG) <sub>18</sub> | (AAAG) <sub>19</sub> | 38      | 1278 |

|        |                                                                                                                                                                                                                                                                                                                                                                                                                                                                                                                                                                                                                         |                                                                                                                                                                                                                                                                                                                                                                                                                                                                                                                                                                                                                         |         |      |
|--------|-------------------------------------------------------------------------------------------------------------------------------------------------------------------------------------------------------------------------------------------------------------------------------------------------------------------------------------------------------------------------------------------------------------------------------------------------------------------------------------------------------------------------------------------------------------------------------------------------------------------------|-------------------------------------------------------------------------------------------------------------------------------------------------------------------------------------------------------------------------------------------------------------------------------------------------------------------------------------------------------------------------------------------------------------------------------------------------------------------------------------------------------------------------------------------------------------------------------------------------------------------------|---------|------|
| DYS576 | (AAAG) <sub>17</sub>                                                                                                                                                                                                                                                                                                                                                                                                                                                                                                                                                                                                    | (AAAG) <sub>16</sub>                                                                                                                                                                                                                                                                                                                                                                                                                                                                                                                                                                                                    | 22      | 1403 |
| DYS576 | (AAAG) <sub>19</sub>                                                                                                                                                                                                                                                                                                                                                                                                                                                                                                                                                                                                    | (AAAG) <sub>18</sub>                                                                                                                                                                                                                                                                                                                                                                                                                                                                                                                                                                                                    | 42      | 1411 |
| DYS576 | (AAAG) <sub>18</sub>                                                                                                                                                                                                                                                                                                                                                                                                                                                                                                                                                                                                    | (AAAG) <sub>17</sub>                                                                                                                                                                                                                                                                                                                                                                                                                                                                                                                                                                                                    | 26      | 1440 |
| DYS576 | (AAAG) <sub>18</sub>                                                                                                                                                                                                                                                                                                                                                                                                                                                                                                                                                                                                    | (AAAG) <sub>19</sub>                                                                                                                                                                                                                                                                                                                                                                                                                                                                                                                                                                                                    | 47      | 1675 |
| DYS576 | (AAAG) <sub>18</sub>                                                                                                                                                                                                                                                                                                                                                                                                                                                                                                                                                                                                    | (AAAG) <sub>19</sub>                                                                                                                                                                                                                                                                                                                                                                                                                                                                                                                                                                                                    | 55      | 1844 |
| DYS576 | (AAAG) <sub>20</sub>                                                                                                                                                                                                                                                                                                                                                                                                                                                                                                                                                                                                    | (AAAG) <sub>19</sub>                                                                                                                                                                                                                                                                                                                                                                                                                                                                                                                                                                                                    | 54      | 1939 |
| DYS578 | (AAAT) <sub>8</sub>                                                                                                                                                                                                                                                                                                                                                                                                                                                                                                                                                                                                     | (AAAT) <sub>9</sub>                                                                                                                                                                                                                                                                                                                                                                                                                                                                                                                                                                                                     | Unknown | 1353 |
| DYS585 | (TTATG) <sub>9</sub>                                                                                                                                                                                                                                                                                                                                                                                                                                                                                                                                                                                                    | (TTATG) <sub>10</sub>                                                                                                                                                                                                                                                                                                                                                                                                                                                                                                                                                                                                   | 35      | 794  |
| DYS585 | (TTATG) <sub>9</sub>                                                                                                                                                                                                                                                                                                                                                                                                                                                                                                                                                                                                    | (TTATG) <sub>8</sub>                                                                                                                                                                                                                                                                                                                                                                                                                                                                                                                                                                                                    | 26      | 1105 |
| DYS585 | (TTATG) <sub>9</sub>                                                                                                                                                                                                                                                                                                                                                                                                                                                                                                                                                                                                    | (TTATG) <sub>10</sub>                                                                                                                                                                                                                                                                                                                                                                                                                                                                                                                                                                                                   | 17      | 1109 |
| DYS587 | (CAATA) <sub>11</sub> [(CAGTA) <sub>1</sub> (CAATA) <sub>1</sub> ] <sub>3</sub>                                                                                                                                                                                                                                                                                                                                                                                                                                                                                                                                         | (CAATA) <sub>10</sub> [(CAGTA) <sub>1</sub> (CAATA) <sub>1</sub> ] <sub>3</sub>                                                                                                                                                                                                                                                                                                                                                                                                                                                                                                                                         | 24      | 83   |
| DYS587 | (CAATA) <sub>11</sub> [(CAGTA) <sub>1</sub> (CAATA) <sub>1</sub> ] <sub>3</sub>                                                                                                                                                                                                                                                                                                                                                                                                                                                                                                                                         | (CAATA) <sub>12</sub> [(CAGTA) <sub>1</sub> (CAATA) <sub>1</sub> ] <sub>3</sub>                                                                                                                                                                                                                                                                                                                                                                                                                                                                                                                                         | 59      | 152  |
| DYS587 | (CAATA) <sub>12</sub> [(CAGTA) <sub>1</sub> (CAATA) <sub>1</sub> ] <sub>3</sub>                                                                                                                                                                                                                                                                                                                                                                                                                                                                                                                                         | (CAATA) <sub>11</sub> [(CAGTA) <sub>1</sub> (CAATA) <sub>1</sub> ] <sub>3</sub>                                                                                                                                                                                                                                                                                                                                                                                                                                                                                                                                         | 25      | 260  |
| DYS587 | (CAATA) <sub>12</sub> [(CAGTA) <sub>1</sub> (CAATA) <sub>1</sub> ] <sub>3</sub>                                                                                                                                                                                                                                                                                                                                                                                                                                                                                                                                         | (CAATA) <sub>13</sub> [(CAGTA) <sub>1</sub> (CAATA) <sub>1</sub> ] <sub>3</sub>                                                                                                                                                                                                                                                                                                                                                                                                                                                                                                                                         | 63      | 917  |
| DYS593 | (AAAAC) <sub>4</sub> (AAAAT) <sub>8</sub>                                                                                                                                                                                                                                                                                                                                                                                                                                                                                                                                                                               | (AAAAC) <sub>4</sub> (AAAAT) <sub>7</sub>                                                                                                                                                                                                                                                                                                                                                                                                                                                                                                                                                                               | 26      | 1082 |
| DYS593 | (AAAAC) <sub>4</sub> (AAAAT) <sub>8</sub>                                                                                                                                                                                                                                                                                                                                                                                                                                                                                                                                                                               | (AAAAC) <sub>4</sub> (AAAAT) <sub>9</sub>                                                                                                                                                                                                                                                                                                                                                                                                                                                                                                                                                                               | Unknown | 1353 |
| DYS594 | (AAATA) <sub>10</sub>                                                                                                                                                                                                                                                                                                                                                                                                                                                                                                                                                                                                   | (AAATA) <sub>11</sub>                                                                                                                                                                                                                                                                                                                                                                                                                                                                                                                                                                                                   | 31      | 1134 |
| DYS611 | (TTC) <sub>5</sub> N <sub>9</sub> (TTC) <sub>4</sub> (CTC) <sub>1</sub> (TTC) <sub>3</sub> N <sub>9</sub> (TTC) <sub>5</sub> (CTC) <sub>1</sub> (TTC) <sub>3</sub> N <sub>15</sub> (TTC) <sub>4</sub> (CT) <sub>1</sub> (TTC) <sub>3</sub> (CTC) <sub>1</sub> (TTC) <sub>3</sub> N <sub>20</sub> (TTC) <sub>3</sub> T<br>(TTC) <sub>4</sub> N <sub>7</sub> (TTC) <sub>3</sub> N <sub>9</sub> (TTC) <sub>4</sub> (TCC) <sub>1</sub> (TTC) <sub>19</sub> N <sub>23</sub> (TTC) <sub>4</sub> N <sub>4</sub><br>[(TTC) <sub>1</sub> (CTC) <sub>1</sub> ] <sub>2</sub> [(CTC) <sub>1</sub> (TTC) <sub>1</sub> ] <sub>3</sub> | (TTC) <sub>5</sub> N <sub>9</sub> (TTC) <sub>4</sub> (CTC) <sub>1</sub> (TTC) <sub>3</sub> N <sub>9</sub> (TTC) <sub>5</sub> (CTC) <sub>1</sub> (TTC) <sub>3</sub> N <sub>15</sub> (TTC) <sub>4</sub> (CT) <sub>1</sub> (TTC) <sub>3</sub> (CTC) <sub>1</sub> (TTC) <sub>3</sub> N <sub>20</sub> (TTC) <sub>3</sub> T<br>(TTC) <sub>4</sub> N <sub>7</sub> (TTC) <sub>3</sub> N <sub>9</sub> (TTC) <sub>4</sub> (TCC) <sub>1</sub> (TTC) <sub>20</sub> N <sub>23</sub> (TTC) <sub>4</sub> N <sub>4</sub><br>[(TTC) <sub>1</sub> (CTC) <sub>1</sub> ] <sub>2</sub> [(CTC) <sub>1</sub> (TTC) <sub>1</sub> ] <sub>3</sub> | 30      | 99   |
| DYS611 | (TTC) <sub>5</sub> N <sub>9</sub> (TTC) <sub>4</sub> (CTC) <sub>1</sub> (TTC) <sub>3</sub> N <sub>9</sub> (TTC) <sub>5</sub> (CTC) <sub>1</sub> (TTC) <sub>3</sub> N <sub>15</sub> (TTC) <sub>4</sub> (CT) <sub>1</sub> (TTC) <sub>3</sub> (CTC) <sub>1</sub> (TTC) <sub>3</sub> N <sub>20</sub> (TTC) <sub>3</sub> T<br>(TTC) <sub>4</sub> N <sub>7</sub> (TTC) <sub>3</sub> N <sub>9</sub> (TTC) <sub>4</sub> (TCC) <sub>1</sub> (TTC) <sub>17</sub> N <sub>23</sub> (TTC) <sub>4</sub> N <sub>4</sub><br>[(TTC) <sub>1</sub> (CTC) <sub>1</sub> ] <sub>2</sub> [(CTC) <sub>1</sub> (TTC) <sub>1</sub> ] <sub>3</sub> | (TTC) <sub>5</sub> N <sub>9</sub> (TTC) <sub>4</sub> (CTC) <sub>1</sub> (TTC) <sub>3</sub> N <sub>9</sub> (TTC) <sub>5</sub> (CTC) <sub>1</sub> (TTC) <sub>3</sub> N <sub>15</sub> (TTC) <sub>4</sub> (CT) <sub>1</sub> (TTC) <sub>3</sub> (CTC) <sub>1</sub> (TTC) <sub>3</sub> N <sub>20</sub> (TTC) <sub>3</sub> T<br>(TTC) <sub>4</sub> N <sub>7</sub> (TTC) <sub>3</sub> N <sub>9</sub> (TTC) <sub>4</sub> (TCC) <sub>1</sub> (TTC) <sub>16</sub> N <sub>23</sub> (TTC) <sub>4</sub> N <sub>4</sub><br>[(TTC) <sub>1</sub> (CTC) <sub>1</sub> ] <sub>2</sub> [(CTC) <sub>1</sub> (TTC) <sub>1</sub> ] <sub>3</sub> | 31      | 164  |
| DYS611 | (TTC) <sub>5</sub> N <sub>9</sub> (TTC) <sub>4</sub> (CTC) <sub>1</sub> (TTC) <sub>3</sub> N <sub>9</sub> (TTC) <sub>5</sub> (CTC) <sub>1</sub> (TTC) <sub>3</sub> N <sub>15</sub> (TTC) <sub>4</sub> (CT) <sub>1</sub> (TTC) <sub>3</sub> (CTC) <sub>1</sub> (TTC) <sub>3</sub> N <sub>20</sub> (TTC) <sub>3</sub> T<br>(TTC) <sub>4</sub> N <sub>7</sub> (TTC) <sub>3</sub> N <sub>9</sub> (TTC) <sub>4</sub> (TCC) <sub>1</sub> (TTC) <sub>18</sub> N <sub>23</sub> (TTC) <sub>4</sub> N <sub>4</sub><br>[(TTC) <sub>1</sub> (CTC) <sub>1</sub> ] <sub>2</sub> [(CTC) <sub>1</sub> (TTC) <sub>1</sub> ] <sub>3</sub> | (TTC) <sub>5</sub> N <sub>9</sub> (TTC) <sub>4</sub> (CTC) <sub>1</sub> (TTC) <sub>3</sub> N <sub>9</sub> (TTC) <sub>5</sub> (CTC) <sub>1</sub> (TTC) <sub>3</sub> N <sub>15</sub> (TTC) <sub>4</sub> (CT) <sub>1</sub> (TTC) <sub>3</sub> (CTC) <sub>1</sub> (TTC) <sub>3</sub> N <sub>20</sub> (TTC) <sub>3</sub> T<br>(TTC) <sub>4</sub> N <sub>7</sub> (TTC) <sub>3</sub> N <sub>9</sub> (TTC) <sub>4</sub> (TCC) <sub>1</sub> (TTC) <sub>16</sub> N <sub>23</sub> (TTC) <sub>4</sub> N <sub>4</sub><br>[(TTC) <sub>1</sub> (CTC) <sub>1</sub> ] <sub>2</sub> [(CTC) <sub>1</sub> (TTC) <sub>1</sub> ] <sub>3</sub> | 20      | 254  |
| DYS611 | (TTC) <sub>5</sub> N <sub>9</sub> (TTC) <sub>4</sub> (CTC) <sub>1</sub> (TTC) <sub>3</sub> N <sub>9</sub> (TTC) <sub>5</sub> (CTC) <sub>1</sub> (TTC) <sub>3</sub> N <sub>15</sub> (TTC) <sub>4</sub> (CT) <sub>1</sub> (TTC) <sub>3</sub> (CTC) <sub>1</sub> (TTC) <sub>3</sub> N <sub>20</sub> (TTC) <sub>3</sub> T<br>(TTC) <sub>4</sub> N <sub>7</sub> (TTC) <sub>3</sub> N <sub>9</sub> (TTC) <sub>4</sub> (TCC) <sub>1</sub> (TTC) <sub>15</sub> N <sub>23</sub> (TTC) <sub>4</sub> N <sub>4</sub><br>[(TTC) <sub>1</sub> (CTC) <sub>1</sub> ] <sub>2</sub> [(CTC) <sub>1</sub> (TTC) <sub>1</sub> ] <sub>3</sub> | (TTC) <sub>5</sub> N <sub>9</sub> (TTC) <sub>4</sub> (CTC) <sub>1</sub> (TTC) <sub>3</sub> N <sub>9</sub> (TTC) <sub>5</sub> (CTC) <sub>1</sub> (TTC) <sub>3</sub> N <sub>15</sub> (TTC) <sub>4</sub> (CT) <sub>1</sub> (TTC) <sub>3</sub> (CTC) <sub>1</sub> (TTC) <sub>3</sub> N <sub>20</sub> (TTC) <sub>3</sub> T<br>(TTC) <sub>4</sub> N <sub>7</sub> (TTC) <sub>3</sub> N <sub>9</sub> (TTC) <sub>4</sub> (TCC) <sub>1</sub> (TTC) <sub>14</sub> N <sub>23</sub> (TTC) <sub>4</sub> N <sub>4</sub><br>[(TTC) <sub>1</sub> (CTC) <sub>1</sub> ] <sub>2</sub> [(CTC) <sub>1</sub> (TTC) <sub>1</sub> ] <sub>3</sub> | 25      | 517  |
| DYS611 | (TTC) <sub>5</sub> N <sub>9</sub> (TTC) <sub>4</sub> (CTC) <sub>1</sub> (TTC) <sub>3</sub> N <sub>9</sub> (TTC) <sub>5</sub> (CTC) <sub>1</sub> (TTC) <sub>3</sub> N <sub>15</sub>                                                                                                                                                                                                                                                                                                                                                                                                                                      | (TTC) <sub>5</sub> N <sub>9</sub> (TTC) <sub>4</sub> (CTC) <sub>1</sub> (TTC) <sub>3</sub> N <sub>9</sub> (TTC) <sub>5</sub> (CTC) <sub>1</sub> (TTC) <sub>3</sub> N <sub>15</sub>                                                                                                                                                                                                                                                                                                                                                                                                                                      | 18      | 956  |





|        |                                                                                                                                                                                                                                                                                                                                                                                                                                                                                               |                                                                                                                                                                                                                                                                                                                                                                                                                                                                                                |    |      |
|--------|-----------------------------------------------------------------------------------------------------------------------------------------------------------------------------------------------------------------------------------------------------------------------------------------------------------------------------------------------------------------------------------------------------------------------------------------------------------------------------------------------|------------------------------------------------------------------------------------------------------------------------------------------------------------------------------------------------------------------------------------------------------------------------------------------------------------------------------------------------------------------------------------------------------------------------------------------------------------------------------------------------|----|------|
| DYS614 | (CTT) <sub>4</sub> (CCT) <sub>1</sub> (CTT) <sub>3</sub> N <sub>15</sub> (CCT) <sub>4</sub> (CTT) <sub>4</sub> (CCT) <sub>1</sub> (CTT) <sub>3</sub> N <sub>18</sub><br>(CCT) <sub>3</sub> (CTT) <sub>5</sub> N <sub>20</sub> [(CTT) <sub>1</sub> (CTG) <sub>1</sub> ] <sub>3</sub> (CT) <sub>1</sub> (CTT) <sub>19</sub> N <sub>8</sub> (CTT) <sub>4</sub><br>[(CTC) <sub>1</sub> (CTT) <sub>1</sub> ] <sub>3</sub> [(CTC) <sub>1</sub> (TTT) <sub>1</sub> ] <sub>1</sub> (CTT) <sub>5</sub> | (CTT) <sub>4</sub> (CCT) <sub>1</sub> (CTT) <sub>3</sub> N <sub>15</sub> (CCT) <sub>4</sub> (CTT) <sub>4</sub> (CCT) <sub>1</sub> (CTT) <sub>3</sub> N <sub>18</sub> (<br>CCT) <sub>3</sub> (CTT) <sub>5</sub> N <sub>20</sub> [(CTT) <sub>1</sub> (CTG) <sub>1</sub> ] <sub>3</sub> (CT) <sub>1</sub> (CTT) <sub>18</sub> N <sub>8</sub> (CTT) <sub>4</sub><br>[(CTC) <sub>1</sub> (CTT) <sub>1</sub> ] <sub>3</sub> [(CTC) <sub>1</sub> (TTT) <sub>1</sub> ] <sub>1</sub> (CTT) <sub>5</sub> | 19 | 1784 |
| DYS614 | (CTT) <sub>4</sub> (CCT) <sub>1</sub> (CTT) <sub>3</sub> N <sub>15</sub> (CCT) <sub>4</sub> (CTT) <sub>4</sub> (CCT) <sub>1</sub> (CTT) <sub>3</sub> N <sub>18</sub><br>(CCT) <sub>3</sub> (CTT) <sub>5</sub> N <sub>20</sub> [(CTT) <sub>1</sub> (CTG) <sub>1</sub> ] <sub>3</sub> (CT) <sub>1</sub> (CTT) <sub>18</sub> N <sub>8</sub> (CTT) <sub>4</sub><br>[(CTC) <sub>1</sub> (CTT) <sub>1</sub> ] <sub>3</sub> [(CTC) <sub>1</sub> (TTT) <sub>1</sub> ] <sub>1</sub> (CTT) <sub>5</sub> | (CTT) <sub>4</sub> (CCT) <sub>1</sub> (CTT) <sub>3</sub> N <sub>15</sub> (CCT) <sub>4</sub> (CTT) <sub>4</sub> (CCT) <sub>1</sub> (CTT) <sub>3</sub> N <sub>18</sub> (<br>CCT) <sub>3</sub> (CTT) <sub>5</sub> N <sub>20</sub> [(CTT) <sub>1</sub> (CTG) <sub>1</sub> ] <sub>3</sub> (CT) <sub>1</sub> (CTT) <sub>16</sub> N <sub>8</sub> (CTT) <sub>4</sub><br>[(CTC) <sub>1</sub> (CTT) <sub>1</sub> ] <sub>3</sub> [(CTC) <sub>1</sub> (TTT) <sub>1</sub> ] <sub>1</sub> (CTT) <sub>5</sub> | 52 | 1965 |
| DYS616 | (TAT) <sub>14</sub> (CAT) <sub>1</sub> (TAT) <sub>3</sub>                                                                                                                                                                                                                                                                                                                                                                                                                                     | (TAT) <sub>15</sub> (CAT) <sub>1</sub> (TAT) <sub>3</sub>                                                                                                                                                                                                                                                                                                                                                                                                                                      | 25 | 40   |
| DYS616 | (TAT) <sub>15</sub> (CAT) <sub>1</sub> (TAT) <sub>3</sub>                                                                                                                                                                                                                                                                                                                                                                                                                                     | (TAT) <sub>14</sub> (CAT) <sub>1</sub> (TAT) <sub>3</sub>                                                                                                                                                                                                                                                                                                                                                                                                                                      | 41 | 417  |
| DYS622 | (GAAA) <sub>6</sub> (AGAAG) <sub>1</sub> (GAAA) <sub>12</sub>                                                                                                                                                                                                                                                                                                                                                                                                                                 | (GAAA) <sub>6</sub> (AGAAG) <sub>1</sub> (GAAA) <sub>13</sub>                                                                                                                                                                                                                                                                                                                                                                                                                                  | 33 | 187  |
| DYS622 | (GAAA) <sub>6</sub> (AGAAG) <sub>1</sub> (GAAA) <sub>14</sub>                                                                                                                                                                                                                                                                                                                                                                                                                                 | (GAAA) <sub>6</sub> (AGAAG) <sub>1</sub> (GAAA) <sub>15</sub>                                                                                                                                                                                                                                                                                                                                                                                                                                  | 34 | 308  |
| DYS622 | (GAAA) <sub>6</sub> (AGAAG) <sub>1</sub> (GAAA) <sub>14</sub>                                                                                                                                                                                                                                                                                                                                                                                                                                 | (GAAA) <sub>6</sub> (AGAAG) <sub>1</sub> (GAAA) <sub>13</sub>                                                                                                                                                                                                                                                                                                                                                                                                                                  | 30 | 842  |
| DYS622 | (GAAA) <sub>6</sub> (AGAAG) <sub>1</sub> (GAAA) <sub>11</sub>                                                                                                                                                                                                                                                                                                                                                                                                                                 | (GAAA) <sub>6</sub> (AGAAG) <sub>1</sub> (GAAA) <sub>10</sub>                                                                                                                                                                                                                                                                                                                                                                                                                                  | 19 | 1006 |
| DYS622 | (GAAA) <sub>6</sub> (AGAAG) <sub>1</sub> (GAAA) <sub>13</sub>                                                                                                                                                                                                                                                                                                                                                                                                                                 | (GAAA) <sub>6</sub> (AGAAG) <sub>1</sub> (GAAA) <sub>12</sub>                                                                                                                                                                                                                                                                                                                                                                                                                                  | 21 | 1436 |
| DYS625 | (CTTT) <sub>4</sub> (TTCT) <sub>1</sub> (CTTT) <sub>3</sub> (TTT) <sub>1</sub> (CTTT) <sub>4</sub> (TT) <sub>1</sub><br>(CTTT) <sub>3</sub> N <sub>47</sub> (CTTT) <sub>4</sub> (CT) <sub>1</sub> (CTTT) <sub>4</sub> (CCTT) <sub>1</sub><br>(CTTT) <sub>3</sub> N <sub>10</sub> (CTTT) <sub>3</sub>                                                                                                                                                                                          | (CTTT) <sub>4</sub> (TTCT) <sub>1</sub> (CTTT) <sub>3</sub> (TTT) <sub>1</sub> (CTTT) <sub>4</sub> (TT) <sub>1</sub><br>(CTTT) <sub>3</sub> N <sub>47</sub> (CTTT) <sub>3</sub> (CT) <sub>1</sub> (CTTT) <sub>4</sub> (CCTT) <sub>1</sub><br>(CTTT) <sub>3</sub> N <sub>10</sub> (CTTT) <sub>3</sub>                                                                                                                                                                                           | 38 | 445  |
| DYS626 | (GAAA) <sub>19</sub> N <sub>24</sub> (GAAA) <sub>3</sub> N <sub>6</sub> (GAAA) <sub>5</sub> (AAA) <sub>1</sub><br>(GAAA) <sub>2</sub> (GAAG) <sub>1</sub> (GAAA) <sub>3</sub>                                                                                                                                                                                                                                                                                                                 | (GAAA) <sub>20</sub> N <sub>24</sub> (GAAA) <sub>3</sub> N <sub>6</sub> (GAAA) <sub>5</sub> (AAA) <sub>1</sub><br>(GAAA) <sub>2</sub> (GAAG) <sub>1</sub> (GAAA) <sub>3</sub>                                                                                                                                                                                                                                                                                                                  | 42 | 383  |
| DYS626 | (GAAA) <sub>16</sub> N <sub>24</sub> (GAAA) <sub>3</sub> N <sub>6</sub> (GAAA) <sub>5</sub> (AAA) <sub>1</sub><br>(GAAA) <sub>2</sub> (GAAG) <sub>1</sub> (GAAA) <sub>3</sub>                                                                                                                                                                                                                                                                                                                 | (GAAA) <sub>17</sub> N <sub>24</sub> (GAAA) <sub>3</sub> N <sub>6</sub> (GAAA) <sub>5</sub> (AAA) <sub>1</sub><br>(GAAA) <sub>2</sub> (GAAG) <sub>1</sub> (GAAA) <sub>3</sub>                                                                                                                                                                                                                                                                                                                  | 37 | 388  |
| DYS626 | (GAAA) <sub>17</sub> N <sub>24</sub> (GAAA) <sub>3</sub> N <sub>6</sub> (GAAA) <sub>5</sub> (AAA) <sub>1</sub><br>(GAAA) <sub>2</sub> (GAAG) <sub>1</sub> (GAAA) <sub>3</sub>                                                                                                                                                                                                                                                                                                                 | (GAAA) <sub>18</sub> N <sub>24</sub> (GAAA) <sub>3</sub> N <sub>6</sub> (GAAA) <sub>5</sub> (AAA) <sub>1</sub><br>(GAAA) <sub>2</sub> (GAAG) <sub>1</sub> (GAAA) <sub>3</sub>                                                                                                                                                                                                                                                                                                                  | 35 | 500  |
| DYS626 | (GAAA) <sub>18</sub> N <sub>24</sub> (GAAA) <sub>3</sub> N <sub>6</sub> (GAAA) <sub>5</sub> (AAA) <sub>1</sub><br>(GAAA) <sub>2</sub> (GAAG) <sub>1</sub> (GAAA) <sub>3</sub>                                                                                                                                                                                                                                                                                                                 | (GAAA) <sub>17</sub> N <sub>24</sub> (GAAA) <sub>3</sub> N <sub>6</sub> (GAAA) <sub>5</sub> (AAA) <sub>1</sub><br>(GAAA) <sub>2</sub> (GAAG) <sub>1</sub> (GAAA) <sub>3</sub>                                                                                                                                                                                                                                                                                                                  | 38 | 529  |
| DYS626 | (GAAA) <sub>19</sub> N <sub>24</sub> (GAAA) <sub>3</sub> N <sub>6</sub> (GAAA) <sub>5</sub> (AAA) <sub>1</sub><br>(GAAA) <sub>2</sub> (GAAG) <sub>1</sub> (GAAA) <sub>3</sub>                                                                                                                                                                                                                                                                                                                 | (GAAA) <sub>18</sub> N <sub>24</sub> (GAAA) <sub>3</sub> N <sub>6</sub> (GAAA) <sub>5</sub> (AAA) <sub>1</sub><br>(GAAA) <sub>2</sub> (GAAG) <sub>1</sub> (GAAA) <sub>3</sub>                                                                                                                                                                                                                                                                                                                  | 24 | 571  |
| DYS626 | (GAAA) <sub>18</sub> N <sub>24</sub> (GAAA) <sub>3</sub> N <sub>6</sub> (GAAA) <sub>5</sub> (AAA) <sub>1</sub><br>(GAAA) <sub>2</sub> (GAAG) <sub>1</sub> (GAAA) <sub>3</sub>                                                                                                                                                                                                                                                                                                                 | (GAAA) <sub>19</sub> N <sub>24</sub> (GAAA) <sub>3</sub> N <sub>6</sub> (GAAA) <sub>5</sub> (AAA) <sub>1</sub><br>(GAAA) <sub>2</sub> (GAAG) <sub>1</sub> (GAAA) <sub>3</sub>                                                                                                                                                                                                                                                                                                                  | 40 | 612  |
| DYS626 | (GAAA) <sub>17</sub> N <sub>24</sub> (GAAA) <sub>3</sub> N <sub>6</sub> (GAAA) <sub>5</sub> (AAA) <sub>1</sub><br>(GAAA) <sub>2</sub> (GAAG) <sub>1</sub> (GAAA) <sub>3</sub>                                                                                                                                                                                                                                                                                                                 | (GAAA) <sub>18</sub> N <sub>24</sub> (GAAA) <sub>3</sub> N <sub>6</sub> (GAAA) <sub>5</sub> (AAA) <sub>1</sub><br>(GAAA) <sub>2</sub> (GAAG) <sub>1</sub> (GAAA) <sub>3</sub>                                                                                                                                                                                                                                                                                                                  | 29 | 650  |
| DYS626 | (GAAA) <sub>19</sub> N <sub>24</sub> (GAAA) <sub>3</sub> N <sub>6</sub> (GAAA) <sub>5</sub> (AAA) <sub>1</sub><br>(GAAA) <sub>2</sub> (GAAG) <sub>1</sub> (GAAA) <sub>3</sub>                                                                                                                                                                                                                                                                                                                 | (GAAA) <sub>20</sub> N <sub>24</sub> (GAAA) <sub>3</sub> N <sub>6</sub> (GAAA) <sub>5</sub> (AAA) <sub>1</sub><br>(GAAA) <sub>2</sub> (GAAG) <sub>1</sub> (GAAA) <sub>3</sub>                                                                                                                                                                                                                                                                                                                  | 36 | 733  |
| DYS626 | (GAAA) <sub>18</sub> N <sub>24</sub> (GAAA) <sub>3</sub> N <sub>6</sub> (GAAA) <sub>5</sub> (AAA) <sub>1</sub><br>(GAAA) <sub>2</sub> (GAAG) <sub>1</sub> (GAAA) <sub>3</sub>                                                                                                                                                                                                                                                                                                                 | (GAAA) <sub>19</sub> N <sub>24</sub> (GAAA) <sub>3</sub> N <sub>6</sub> (GAAA) <sub>5</sub> (AAA) <sub>1</sub><br>(GAAA) <sub>2</sub> (GAAG) <sub>1</sub> (GAAA) <sub>3</sub>                                                                                                                                                                                                                                                                                                                  | 41 | 779  |
| DYS626 | (GAAA) <sub>20</sub> N <sub>24</sub> (GAAA) <sub>3</sub> N <sub>6</sub> (GAAA) <sub>5</sub> (AAA) <sub>1</sub><br>(GAAA) <sub>2</sub> (GAAG) <sub>1</sub> (GAAA) <sub>3</sub>                                                                                                                                                                                                                                                                                                                 | (GAAA) <sub>19</sub> N <sub>24</sub> (GAAA) <sub>3</sub> N <sub>6</sub> (GAAA) <sub>5</sub> (AAA) <sub>1</sub><br>(GAAA) <sub>2</sub> (GAAG) <sub>1</sub> (GAAA) <sub>3</sub>                                                                                                                                                                                                                                                                                                                  | 29 | 901  |

|        |                                                                                                                                                                               |                                                                                                                                                                               |    |      |
|--------|-------------------------------------------------------------------------------------------------------------------------------------------------------------------------------|-------------------------------------------------------------------------------------------------------------------------------------------------------------------------------|----|------|
| DYS626 | (GAAA) <sub>20</sub> N <sub>24</sub> (GAAA) <sub>3</sub> N <sub>6</sub> (GAAA) <sub>5</sub> (AAA) <sub>1</sub><br>(GAAA) <sub>2</sub> (GAAG) <sub>1</sub> (GAAA) <sub>3</sub> | (GAAA) <sub>21</sub> N <sub>24</sub> (GAAA) <sub>3</sub> N <sub>6</sub> (GAAA) <sub>5</sub> (AAA) <sub>1</sub><br>(GAAA) <sub>2</sub> (GAAG) <sub>1</sub> (GAAA) <sub>3</sub> | 27 | 953  |
| DYS626 | (GAAA) <sub>19</sub> N <sub>24</sub> (GAAA) <sub>3</sub> N <sub>6</sub> (GAAA) <sub>5</sub> (AAA) <sub>1</sub><br>(GAAA) <sub>2</sub> (GAAG) <sub>1</sub> (GAAA) <sub>3</sub> | (GAAA) <sub>20</sub> N <sub>24</sub> (GAAA) <sub>3</sub> N <sub>6</sub> (GAAA) <sub>5</sub> (AAA) <sub>1</sub><br>(GAAA) <sub>2</sub> (GAAG) <sub>1</sub> (GAAA) <sub>3</sub> | 39 | 1071 |
| DYS626 | (GAAA) <sub>17</sub> N <sub>24</sub> (GAAA) <sub>3</sub> N <sub>6</sub> (GAAA) <sub>5</sub> (AAA) <sub>1</sub><br>(GAAA) <sub>2</sub> (GAAG) <sub>1</sub> (GAAA) <sub>3</sub> | (GAAA) <sub>18</sub> N <sub>24</sub> (GAAA) <sub>3</sub> N <sub>6</sub> (GAAA) <sub>5</sub> (AAA) <sub>1</sub><br>(GAAA) <sub>2</sub> (GAAG) <sub>1</sub> (GAAA) <sub>3</sub> | 17 | 1109 |
| DYS626 | (GAAA) <sub>19</sub> N <sub>24</sub> (GAAA) <sub>3</sub> N <sub>6</sub> (GAAA) <sub>5</sub> (AAA) <sub>1</sub><br>(GAAA) <sub>2</sub> (GAAG) <sub>1</sub> (GAAA) <sub>3</sub> | (GAAA) <sub>20</sub> N <sub>24</sub> (GAAA) <sub>3</sub> N <sub>6</sub> (GAAA) <sub>5</sub> (AAA) <sub>1</sub><br>(GAAA) <sub>2</sub> (GAAG) <sub>1</sub> (GAAA) <sub>3</sub> | 33 | 1112 |
| DYS626 | (GAAA) <sub>19</sub> N <sub>24</sub> (GAAA) <sub>3</sub> N <sub>6</sub> (GAAA) <sub>5</sub> (AAA) <sub>1</sub><br>(GAAA) <sub>2</sub> (GAAG) <sub>1</sub> (GAAA) <sub>3</sub> | (GAAA) <sub>20</sub> N <sub>24</sub> (GAAA) <sub>3</sub> N <sub>6</sub> (GAAA) <sub>5</sub> (AAA) <sub>1</sub><br>(GAAA) <sub>2</sub> (GAAG) <sub>1</sub> (GAAA) <sub>3</sub> | 27 | 1389 |
| DYS626 | (GAAA) <sub>19</sub> N <sub>24</sub> (GAAA) <sub>3</sub> N <sub>6</sub> (GAAA) <sub>5</sub> (AAA) <sub>1</sub><br>(GAAA) <sub>2</sub> (GAAG) <sub>1</sub> (GAAA) <sub>3</sub> | (GAAA) <sub>18</sub> N <sub>24</sub> (GAAA) <sub>3</sub> N <sub>6</sub> (GAAA) <sub>5</sub> (AAA) <sub>1</sub><br>(GAAA) <sub>2</sub> (GAAG) <sub>1</sub> (GAAA) <sub>3</sub> | 25 | 1445 |
| DYS626 | (GAAA) <sub>16</sub> N <sub>24</sub> (GAAA) <sub>3</sub> N <sub>6</sub> (GAAA) <sub>5</sub> (AAA) <sub>1</sub><br>(GAAA) <sub>2</sub> (GAAG) <sub>1</sub> (GAAA) <sub>3</sub> | (GAAA) <sub>15</sub> N <sub>24</sub> (GAAA) <sub>3</sub> N <sub>6</sub> (GAAA) <sub>5</sub> (AAA) <sub>1</sub><br>(GAAA) <sub>2</sub> (GAAG) <sub>1</sub> (GAAA) <sub>3</sub> | 25 | 1514 |
| DYS626 | (GAAA) <sub>18</sub> N <sub>24</sub> (GAAA) <sub>3</sub> N <sub>6</sub> (GAAA) <sub>5</sub> (AAA) <sub>1</sub><br>(GAAA) <sub>2</sub> (GAAG) <sub>1</sub> (GAAA) <sub>3</sub> | (GAAA) <sub>19</sub> N <sub>24</sub> (GAAA) <sub>3</sub> N <sub>6</sub> (GAAA) <sub>5</sub> (AAA) <sub>1</sub><br>(GAAA) <sub>2</sub> (GAAG) <sub>1</sub> (GAAA) <sub>3</sub> | 19 | 1530 |
| DYS626 | (GAAA) <sub>19</sub> N <sub>24</sub> (GAAA) <sub>3</sub> N <sub>6</sub> (GAAA) <sub>5</sub> (AAA) <sub>1</sub><br>(GAAA) <sub>2</sub> (GAAG) <sub>1</sub> (GAAA) <sub>3</sub> | (GAAA) <sub>20</sub> N <sub>24</sub> (GAAA) <sub>3</sub> N <sub>6</sub> (GAAA) <sub>5</sub> (AAA) <sub>1</sub><br>(GAAA) <sub>2</sub> (GAAG) <sub>1</sub> (GAAA) <sub>3</sub> | 59 | 1823 |
| DYS626 | (GAAA) <sub>22</sub> N <sub>24</sub> (GAAA) <sub>3</sub> N <sub>6</sub> (GAAA) <sub>5</sub> (AAA) <sub>1</sub><br>(GAAA) <sub>2</sub> (GAAG) <sub>1</sub> (GAAA) <sub>3</sub> | (GAAA) <sub>21</sub> N <sub>24</sub> (GAAA) <sub>3</sub> N <sub>6</sub> (GAAA) <sub>5</sub> (AAA) <sub>1</sub><br>(GAAA) <sub>2</sub> (GAAG) <sub>1</sub> (GAAA) <sub>3</sub> | 56 | 1907 |
| DYS627 | (AGAA) <sub>3</sub> N <sub>16</sub> (AGAG) <sub>3</sub> (AAAG) <sub>21</sub> N <sub>81</sub> (AAGG) <sub>3</sub>                                                              | (AGAA) <sub>3</sub> N <sub>16</sub> (AGAG) <sub>3</sub> (AAAG) <sub>20</sub> N <sub>81</sub> (AAGG) <sub>3</sub>                                                              | 25 | 4    |
| DYS627 | (AGAA) <sub>3</sub> N <sub>16</sub> (AGAG) <sub>3</sub> (AAAG) <sub>22</sub> N <sub>81</sub> (AAGG) <sub>3</sub>                                                              | (AGAA) <sub>3</sub> N <sub>16</sub> (AGAG) <sub>3</sub> (AAAG) <sub>21</sub> N <sub>81</sub> (AAGG) <sub>3</sub>                                                              | 36 | 49   |
| DYS627 | (AGAA) <sub>3</sub> N <sub>16</sub> (AGAG) <sub>3</sub> (AAAG) <sub>18</sub> N <sub>81</sub> (AAGG) <sub>3</sub>                                                              | (AGAA) <sub>3</sub> N <sub>16</sub> (AGAG) <sub>3</sub> (AAAG) <sub>19</sub> N <sub>81</sub> (AAGG) <sub>3</sub>                                                              | 29 | 82   |
| DYS627 | (AGAA) <sub>3</sub> N <sub>16</sub> (AGAG) <sub>3</sub> (AAAG) <sub>18</sub> N <sub>81</sub> (AAGG) <sub>3</sub>                                                              | (AGAA) <sub>3</sub> N <sub>16</sub> (AGAG) <sub>3</sub> (AAAG) <sub>19</sub> N <sub>81</sub> (AAGG) <sub>3</sub>                                                              | 39 | 112  |
| DYS627 | (AGAA) <sub>3</sub> N <sub>16</sub> (AGAG) <sub>3</sub> (AAAG) <sub>19</sub> N <sub>81</sub> (AAGG) <sub>3</sub>                                                              | (AGAA) <sub>3</sub> N <sub>16</sub> (AGAG) <sub>3</sub> (AAAG) <sub>18</sub> N <sub>81</sub> (AAGG) <sub>3</sub>                                                              | 27 | 170  |
| DYS627 | (AGAA) <sub>3</sub> N <sub>16</sub> (AGAG) <sub>3</sub> (AAAG) <sub>20</sub> N <sub>81</sub> (AAGG) <sub>3</sub>                                                              | (AGAA) <sub>3</sub> N <sub>16</sub> (AGAG) <sub>3</sub> (AAAG) <sub>21</sub> N <sub>81</sub> (AAGG) <sub>3</sub>                                                              | 34 | 243  |
| DYS627 | (AGAA) <sub>3</sub> N <sub>16</sub> (AGAG) <sub>3</sub> (AAAG) <sub>19</sub> N <sub>81</sub> (AAGG) <sub>3</sub>                                                              | (AGAA) <sub>3</sub> N <sub>16</sub> (AGAG) <sub>3</sub> (AAAG) <sub>18</sub> N <sub>81</sub> (AAGG) <sub>3</sub>                                                              | 20 | 256  |
| DYS627 | (AGAA) <sub>3</sub> N <sub>16</sub> (AGAG) <sub>3</sub> (AAAG) <sub>19</sub> N <sub>81</sub> (AAGG) <sub>3</sub>                                                              | (AGAA) <sub>3</sub> N <sub>16</sub> (AGAG) <sub>3</sub> (AAAG) <sub>20</sub> N <sub>81</sub> (AAGG) <sub>3</sub>                                                              | 21 | 328  |
| DYS627 | (AGAA) <sub>3</sub> N <sub>16</sub> (AGAG) <sub>3</sub> (AAAG) <sub>19</sub> N <sub>81</sub> (AAGG) <sub>3</sub>                                                              | (AGAA) <sub>3</sub> N <sub>16</sub> (AGAG) <sub>3</sub> (AAAG) <sub>20</sub> N <sub>81</sub> (AAGG) <sub>3</sub>                                                              | 31 | 331  |
| DYS627 | (AGAA) <sub>3</sub> N <sub>16</sub> (AGAG) <sub>3</sub> (AAAG) <sub>18</sub> N <sub>81</sub> (AAGG) <sub>3</sub>                                                              | (AGAA) <sub>3</sub> N <sub>16</sub> (AGAG) <sub>3</sub> (AAAG) <sub>17</sub> N <sub>81</sub> (AAGG) <sub>3</sub>                                                              | 37 | 355  |
| DYS627 | (AGAA) <sub>3</sub> N <sub>16</sub> (AGAG) <sub>3</sub> (AAAG) <sub>20</sub> N <sub>81</sub> (AAGG) <sub>3</sub>                                                              | (AGAA) <sub>3</sub> N <sub>16</sub> (AGAG) <sub>3</sub> (AAAG) <sub>21</sub> N <sub>81</sub> (AAGG) <sub>3</sub>                                                              | 23 | 496  |
| DYS627 | (AGAA) <sub>3</sub> N <sub>16</sub> (AGAG) <sub>3</sub> (AAAG) <sub>23</sub> N <sub>81</sub> (AAGG) <sub>3</sub>                                                              | (AGAA) <sub>3</sub> N <sub>16</sub> (AGAG) <sub>3</sub> (AAAG) <sub>22</sub> N <sub>81</sub> (AAGG) <sub>3</sub>                                                              | 35 | 500  |
| DYS627 | (AGAA) <sub>3</sub> N <sub>16</sub> (AGAG) <sub>3</sub> (AAAG) <sub>20</sub> N <sub>81</sub> (AAGG) <sub>3</sub>                                                              | (AGAA) <sub>3</sub> N <sub>16</sub> (AGAG) <sub>3</sub> (AAAG) <sub>19</sub> N <sub>81</sub> (AAGG) <sub>3</sub>                                                              | 36 | 619  |
| DYS627 | (AGAA) <sub>3</sub> N <sub>16</sub> (AGAG) <sub>3</sub> (AAAG) <sub>20</sub> N <sub>81</sub> (AAGG) <sub>3</sub>                                                              | (AGAA) <sub>3</sub> N <sub>16</sub> (AGAG) <sub>3</sub> (AAAG) <sub>19</sub> N <sub>81</sub> (AAGG) <sub>3</sub>                                                              | 25 | 711  |

|        |                                                                                                                             |                                                                                                                          |         |      |
|--------|-----------------------------------------------------------------------------------------------------------------------------|--------------------------------------------------------------------------------------------------------------------------|---------|------|
| DYS627 | (AGAA) <sub>3</sub> N <sub>16</sub> (AGAG) <sub>3</sub> (AAAG) <sub>19</sub> N <sub>81</sub> (AAGG) <sub>3</sub>            | (AGAA) <sub>3</sub> N <sub>16</sub> (AGAG) <sub>3</sub> (AAAG) <sub>18</sub> N <sub>81</sub> (AAGG) <sub>3</sub>         | 20      | 742  |
| DYS627 | (AGAA) <sub>3</sub> N <sub>16</sub> (AGAG) <sub>3</sub> (AAAG) <sub>19</sub> N <sub>81</sub> (AAGG) <sub>3</sub>            | (AGAA) <sub>3</sub> N <sub>16</sub> (AGAG) <sub>3</sub> (AAAG) <sub>20</sub> N <sub>81</sub> (AAGG) <sub>3</sub>         | 29      | 789  |
| DYS627 | (AGAA) <sub>3</sub> N <sub>16</sub> (AGAG) <sub>3</sub> (AAAG) <sub>19</sub> N <sub>81</sub> (AAGG) <sub>3</sub>            | (AGAA) <sub>3</sub> N <sub>16</sub> (AGAG) <sub>3</sub> (AAAG) <sub>20</sub> N <sub>81</sub> (AAGG) <sub>3</sub>         | Unknown | 1310 |
| DYS627 | (AGAA) <sub>3</sub> N <sub>16</sub> (AGAG) <sub>3</sub> (AAAG) <sub>15</sub> N <sub>81</sub> (AAGG) <sub>3</sub>            | (AGAA) <sub>3</sub> N <sub>16</sub> (AGAG) <sub>3</sub> (AAAG) <sub>16</sub> N <sub>81</sub> (AAGG) <sub>3</sub>         | 22      | 1323 |
| DYS627 | (AGAA) <sub>3</sub> N <sub>16</sub> (AGAG) <sub>3</sub> (AAAG) <sub>18</sub> N <sub>81</sub> (AAGG) <sub>3</sub>            | (AGAA) <sub>3</sub> N <sub>16</sub> (AGAG) <sub>3</sub> (AAAG) <sub>19</sub> N <sub>81</sub> (AAGG) <sub>3</sub>         | 42      | 1407 |
| DYS627 | (AGAA) <sub>3</sub> N <sub>16</sub> (AGAG) <sub>3</sub> (AAAG) <sub>22</sub> N <sub>81</sub> (AAGG) <sub>3</sub>            | (AGAA) <sub>3</sub> N <sub>16</sub> (AGAG) <sub>3</sub> (AAAG) <sub>23</sub> N <sub>81</sub> (AAGG) <sub>3</sub>         | 17      | 1416 |
| DYS627 | (AGAA) <sub>3</sub> N <sub>16</sub> (AGAG) <sub>3</sub> (AAAG) <sub>19</sub> N <sub>81</sub> (AAGG) <sub>3</sub>            | (AGAA) <sub>3</sub> N <sub>16</sub> (AGAG) <sub>3</sub> (AAAG) <sub>20</sub> N <sub>81</sub> (AAGG) <sub>3</sub>         | 54      | 1860 |
| DYS629 | (TATC) <sub>9</sub>                                                                                                         | (TATC) <sub>10</sub>                                                                                                     | 29      | 609  |
| DYS630 | (AAAG) <sub>4</sub> (AGAG) <sub>3</sub> N <sub>18</sub> (AAAG) <sub>14</sub>                                                | (AAAG) <sub>4</sub> (AGAG) <sub>3</sub> N <sub>18</sub> (AAAG) <sub>15</sub>                                             | 21      | 46   |
| DYS630 | (AAAG) <sub>4</sub> (AGAG) <sub>3</sub> N <sub>18</sub> (AAAG) <sub>15</sub>                                                | (AAAG) <sub>4</sub> (AGAG) <sub>3</sub> N <sub>18</sub> (AAAG) <sub>14</sub>                                             | 33      | 53   |
| DYS630 | (AAAG) <sub>4</sub> (AGAG) <sub>3</sub> N <sub>18</sub> (AAAG) <sub>18</sub>                                                | (AAAG) <sub>4</sub> (AGAG) <sub>3</sub> N <sub>18</sub> (AAAG) <sub>17</sub>                                             | 23      | 96   |
| DYS630 | (AAAG) <sub>4</sub> (AGAG) <sub>3</sub> N <sub>18</sub> (AAAG) <sub>16</sub>                                                | (AAAG) <sub>4</sub> (AGAG) <sub>3</sub> N <sub>18</sub> (AAAG) <sub>15</sub>                                             | 40      | 255  |
| DYS630 | (AAAG) <sub>4</sub> (AGAG) <sub>3</sub> N <sub>18</sub> (AAAG) <sub>15</sub>                                                | (AAAG) <sub>4</sub> (AGAG) <sub>3</sub> N <sub>18</sub> (AAAG) <sub>16</sub>                                             | 30      | 448  |
| DYS630 | (AAAG) <sub>4</sub> (AGAG) <sub>3</sub> N <sub>18</sub> (AAAG) <sub>13</sub>                                                | (AAAG) <sub>4</sub> (AGAG) <sub>3</sub> N <sub>18</sub> (AAAG) <sub>14</sub>                                             | 21      | 478  |
| DYS630 | (AAAG) <sub>4</sub> (AGAG) <sub>3</sub> N <sub>18</sub> (AAAG) <sub>17</sub>                                                | (AAAG) <sub>4</sub> (AGAG) <sub>3</sub> N <sub>18</sub> (AAAG) <sub>18</sub>                                             | 39      | 501  |
| DYS630 | (AAAG) <sub>4</sub> (AGAG) <sub>3</sub> N <sub>18</sub> (AAAG) <sub>14</sub>                                                | (AAAG) <sub>4</sub> (AGAG) <sub>3</sub> N <sub>18</sub> (AAAG) <sub>15</sub>                                             | 36      | 665  |
| DYS631 | (AATA) <sub>4</sub> (CATA) <sub>1</sub> (AATA) <sub>11</sub>                                                                | (AATA) <sub>4</sub> (CATA) <sub>1</sub> (AATA) <sub>10</sub>                                                             | 47      | 347  |
| DYS635 | (TCTA) <sub>4</sub> (TGTA) <sub>2</sub> (TCTA) <sub>2</sub> (TGTA) <sub>2</sub> (TCTA) <sub>2</sub> (TCTA) <sub>12</sub>    | (TCTA) <sub>4</sub> (TGTA) <sub>2</sub> (TCTA) <sub>2</sub> (TGTA) <sub>2</sub> (TCTA) <sub>2</sub> (TCTA) <sub>11</sub> | 53      | 35   |
| DYS635 | (TCTA) <sub>4</sub> (TGTA) <sub>2</sub> (TCTA) <sub>2</sub> (TGTA) <sub>2</sub> (TCTA) <sub>2</sub> (TCTA) <sub>13,14</sub> | (TCTA) <sub>4</sub> (TGTA) <sub>2</sub> (TCTA) <sub>2</sub> (TGTA) <sub>2</sub> (TCTA) <sub>2</sub> (TCTA) <sub>13</sub> | 33      | 528  |
| DYS635 | (TCTA) <sub>4</sub> (TGTA) <sub>2</sub> (TCTA) <sub>2</sub> (TGTA) <sub>2</sub> (TCTA) <sub>2</sub> (TCTA) <sub>13</sub>    | (TCTA) <sub>4</sub> (TGTA) <sub>2</sub> (TCTA) <sub>2</sub> (TGTA) <sub>2</sub> (TCTA) <sub>2</sub> (TCTA) <sub>12</sub> | 36      | 617  |
| DYS635 | (TCTA) <sub>4</sub> (TGTA) <sub>2</sub> (TCTA) <sub>2</sub> (TGTA) <sub>2</sub> (TCTA) <sub>2</sub> (TCTA) <sub>12</sub>    | (TCTA) <sub>4</sub> (TGTA) <sub>2</sub> (TCTA) <sub>2</sub> (TGTA) <sub>2</sub> (TCTA) <sub>2</sub> (TCTA) <sub>11</sub> | 26      | 800  |
| DYS635 | (TCTA) <sub>4</sub> (TGTA) <sub>2</sub> (TCTA) <sub>2</sub> (TGTA) <sub>2</sub> (TCTA) <sub>2</sub> (TCTA) <sub>12</sub>    | (TCTA) <sub>4</sub> (TGTA) <sub>2</sub> (TCTA) <sub>2</sub> (TGTA) <sub>2</sub> (TCTA) <sub>2</sub> (TCTA) <sub>11</sub> | 29      | 1674 |
| DYS635 | (TCTA) <sub>4</sub> (TGTA) <sub>2</sub> (TCTA) <sub>2</sub> (TGTA) <sub>2</sub> (TCTA) <sub>2</sub> (TCTA) <sub>11</sub>    | (TCTA) <sub>4</sub> (TGTA) <sub>2</sub> (TCTA) <sub>2</sub> (TGTA) <sub>2</sub> (TCTA) <sub>2</sub> (TCTA) <sub>12</sub> | 52      | 1891 |
| DYS637 | (AAAT) <sub>4</sub> (ACAT) <sub>11</sub>                                                                                    | (AAAT) <sub>4</sub> (ACAT) <sub>10</sub>                                                                                 | 25      | 950  |
| DYS638 | (TTTA) <sub>11</sub>                                                                                                        | (TTTA) <sub>12</sub>                                                                                                     | 56      | 1677 |
| DYS643 | (AAAT) <sub>11</sub>                                                                                                        | (AAAT) <sub>12</sub>                                                                                                     | 32      | 95   |
| DYS643 | (AAAT) <sub>13</sub>                                                                                                        | (AAAT) <sub>14</sub>                                                                                                     | 19      | 1697 |
| DYS644 | (TTTTA) <sub>10</sub> (TTTTA) <sub>7</sub>                                                                                  | (TTTTA) <sub>10</sub> (TTTTA) <sub>8</sub>                                                                               | 22      | 487  |
| DYS644 | (TTTTA) <sub>10</sub> (TTTTA) <sub>6</sub>                                                                                  | (TTTTA) <sub>10</sub> (TTTTA) <sub>5</sub>                                                                               | 24      | 681  |
| DYS644 | (TTTTA) <sub>10</sub> (TTTA) <sub>1</sub> (TTTTA) <sub>13</sub>                                                             | (TTTTA) <sub>11</sub> (TTTA) <sub>1</sub> (TTTTA) <sub>13</sub>                                                          | 21      | 1667 |

|            |                                                                                                                  |                                                                                                                  |    |      |
|------------|------------------------------------------------------------------------------------------------------------------|------------------------------------------------------------------------------------------------------------------|----|------|
| DYS644     | (TTTTA) <sub>10</sub> (TTTFA) <sub>6</sub>                                                                       | (TTTTA) <sub>10</sub> (TTTFA) <sub>7</sub>                                                                       | 19 | 1717 |
| DYS644     | (TTTTA) <sub>10</sub> (TTTFA) <sub>7</sub>                                                                       | (TTTTA) <sub>10</sub> (TTTFA) <sub>6</sub>                                                                       | 50 | 1832 |
| Y-GATA-A10 | (ATCT) <sub>13</sub>                                                                                             | (ATCT) <sub>14</sub>                                                                                             | 41 | 417  |
| Y-GATA-A10 | (ATCT) <sub>14</sub>                                                                                             | (ATCT) <sub>15</sub>                                                                                             | 35 | 735  |
| Y-GATA-A10 | (ATCT) <sub>13</sub>                                                                                             | (ATCT) <sub>12</sub>                                                                                             | 24 | 855  |
| Y-GATA-A10 | (ATCT) <sub>13</sub>                                                                                             | (ATCT) <sub>12</sub>                                                                                             | 46 | 1252 |
| Y-GATA-A10 | (ATCT) <sub>13</sub>                                                                                             | (ATCT) <sub>14</sub>                                                                                             | 40 | 1606 |
| Y-GATA-H4  | (TAGA) <sub>3</sub> N <sub>12</sub> (TAGG) <sub>3</sub> (TAGA) <sub>12</sub> N <sub>22</sub> (TAGA) <sub>4</sub> | (TAGA) <sub>3</sub> N <sub>12</sub> (TAGG) <sub>3</sub> (TAGA) <sub>11</sub> N <sub>22</sub> (TAGA) <sub>4</sub> | 23 | 251  |
| Y-GATA-H4  | (TAGA) <sub>3</sub> N <sub>12</sub> (TAGG) <sub>3</sub> (TAGA) <sub>11</sub> N <sub>22</sub> (TAGA) <sub>4</sub> | (TAGA) <sub>3</sub> N <sub>12</sub> (TAGG) <sub>3</sub> (TAGA) <sub>12</sub> N <sub>22</sub> (TAGA) <sub>4</sub> | 19 | 1004 |
| Y-GATA-H4  | (TAGA) <sub>3</sub> N <sub>12</sub> (TAGG) <sub>3</sub> (TAGA) <sub>12</sub> N <sub>22</sub> (TAGA) <sub>4</sub> | (TAGA) <sub>3</sub> N <sub>12</sub> (TAGG) <sub>3</sub> (TAGA) <sub>11</sub> N <sub>22</sub> (TAGA) <sub>4</sub> | 29 | 1051 |
| Y-GATA-H4  | (TAGA) <sub>3</sub> N <sub>12</sub> (TAGG) <sub>3</sub> (TAGA) <sub>13</sub> N <sub>22</sub> (TAGA) <sub>4</sub> | (TAGA) <sub>3</sub> N <sub>12</sub> (TAGG) <sub>3</sub> (TAGA) <sub>12</sub> N <sub>22</sub> (TAGA) <sub>4</sub> | 42 | 1411 |
| Y-GATA-H4  | (TAGA) <sub>3</sub> N <sub>12</sub> (TAGG) <sub>3</sub> (TAGA) <sub>13</sub> N <sub>22</sub> (TAGA) <sub>4</sub> | (TAGA) <sub>3</sub> N <sub>12</sub> (TAGG) <sub>3</sub> (TAGA) <sub>12</sub> N <sub>22</sub> (TAGA) <sub>4</sub> | 53 | 1799 |

The repeat structure of both the father and son's alleles at the mutated Y-STR are given where possible. In the case of multicopy markers with multiple variable segments within the STR, total repeat numbers or amplicon size is given in the absence of sequence information. The age of the father at the time of the son's birth is given, as is an individual pair reference.

**Table S3. Ability of 13 Rapidly-Mutating RM Y-STRs and 17 Yfiler Y-STRs to Differentiate between Pairs of Male Relatives by One or More Mutations**

| <b>Number of Meioses Separating Pair</b> | <b>RM Y-STR Mutations</b> | <b>RM Y-STR Locus Comparisons</b> | <b>Yfiler Mutations</b> | <b>Yfiler Locus Comparisons</b> |
|------------------------------------------|---------------------------|-----------------------------------|-------------------------|---------------------------------|
| 1                                        | 1                         | 9                                 | 0                       | 17                              |
| 1                                        | 1                         | 12                                | 0                       | 17                              |
| 1                                        | 1                         | 12                                | 0                       | 17                              |
| 1                                        | 1                         | 11                                | 0                       | 17                              |
| 1                                        | 1                         | 10                                | 0                       | 17                              |
| 1                                        | 1                         | 12                                | 0                       | 17                              |
| 1                                        | 2                         | 5                                 | 0                       | 17                              |
| 1                                        | 0                         | 13                                | 0                       | 17                              |
| 1                                        | 1                         | 12                                | 0                       | 17                              |
| 1                                        | 0                         | 13                                | 0                       | 17                              |
| 1                                        | 0                         | 13                                | 0                       | 17                              |
| 1                                        | 1                         | 13                                | 0                       | 17                              |
| 1                                        | 0                         | 13                                | 0                       | 17                              |
| 1                                        | 0                         | 13                                | 0                       | 17                              |
| 1                                        | 3                         | 11                                | 0                       | 17                              |
| 1                                        | 1                         | 10                                | 0                       | 17                              |
| 1                                        | 0                         | 13                                | 0                       | 17                              |
| 1                                        | 1                         | 10                                | 0                       | 17                              |
| 1                                        | 1                         | 4                                 | 0                       | 17                              |
| 1                                        | 1                         | 12                                | 0                       | 17                              |
| 2                                        | 1                         | 12                                | 0                       | 17                              |
| 2                                        | 2                         | 11                                | 0                       | 17                              |
| 2                                        | 1                         | 8                                 | 0                       | 17                              |
| 2                                        | 2                         | 11                                | 0                       | 17                              |
| 2                                        | 2                         | 13                                | 0                       | 17                              |
| 2                                        | 1                         | 9                                 | 0                       | 17                              |
| 2                                        | 2                         | 13                                | 0                       | 17                              |
| 2                                        | 0                         | 13                                | 0                       | 17                              |
| 2                                        | 0                         | 13                                | 0                       | 17                              |
| 2                                        | 0                         | 13                                | 0                       | 17                              |
| 2                                        | 1                         | 13                                | 0                       | 17                              |
| 2                                        | 0                         | 13                                | 0                       | 17                              |
| 2                                        | 0                         | 13                                | 0                       | 17                              |
| 2                                        | 1                         | 12                                | 0                       | 17                              |
| 2                                        | 3                         | 13                                | 0                       | 17                              |
| 2                                        | 0                         | 13                                | 0                       | 17                              |

|   |   |    |   |    |
|---|---|----|---|----|
| 2 | 0 | 13 | 0 | 17 |
| 2 | 0 | 13 | 1 | 17 |
| 2 | 0 | 13 | 0 | 17 |
| 2 | 0 | 13 | 0 | 17 |
| 2 | 3 | 13 | 0 | 17 |
| 2 | 0 | 12 | 0 | 17 |
| 2 | 4 | 13 | 0 | 17 |
| 2 | 1 | 13 | 0 | 17 |
| 2 | 3 | 13 | 0 | 17 |
| 2 | 0 | 13 | 0 | 17 |
| 2 | 0 | 13 | 0 | 17 |
| 2 | 0 | 13 | 0 | 17 |
| 2 | 1 | 13 | 0 | 17 |
| 2 | 0 | 13 | 0 | 17 |
| 2 | 1 | 10 | 1 | 17 |
| 2 | 1 | 13 | 0 | 17 |
| 2 | 1 | 13 | 0 | 17 |
| 2 | 2 | 3  | 0 | 17 |
| 3 | 0 | 13 | 0 | 17 |
| 3 | 0 | 13 | 0 | 17 |
| 3 | 0 | 13 | 0 | 17 |
| 3 | 2 | 12 | 0 | 17 |
| 3 | 2 | 12 | 0 | 17 |
| 3 | 2 | 13 | 0 | 17 |
| 3 | 3 | 13 | 0 | 17 |
| 4 | 0 | 13 | 0 | 17 |
| 4 | 1 | 13 | 0 | 17 |
| 4 | 1 | 13 | 0 | 17 |
| 5 | 1 | 5  | 0 | 17 |
| 5 | 1 | 13 | 0 | 17 |
| 5 | 1 | 12 | 0 | 17 |
| 5 | 2 | 12 | 0 | 17 |
| 6 | 3 | 9  | 0 | 17 |
| 6 | 1 | 10 | 0 | 17 |
| 6 | 1 | 13 | 2 | 17 |
| 6 | 5 | 12 | 1 | 17 |
| 6 | 3 | 13 | 0 | 17 |
| 6 | 4 | 13 | 0 | 17 |
| 6 | 3 | 13 | 0 | 17 |
| 6 | 0 | 13 | 0 | 17 |
| 6 | 2 | 13 | 0 | 17 |

|                |             |              |             |             |
|----------------|-------------|--------------|-------------|-------------|
| 7              | 0           | 13           | 0           | 17          |
| 7              | 4           | 13           | 1           | 17          |
| 8              | 3           | 13           | 0           | 17          |
| 8              | 4           | 13           | 0           | 17          |
| 8              | 2           | 13           | 0           | 17          |
| 8              | 0           | 13           | 0           | 17          |
| 8              | 0           | 13           | 1           | 17          |
| 8              | 4           | 13           | 0           | 17          |
| 8              | 2           | 13           | 0           | 17          |
| 9              | 1           | 13           | 1           | 17          |
| 10             | 1           | 13           | 0           | 17          |
| 10             | 4           | 12           | 1           | 17          |
| 10             | 2           | 13           | 0           | 17          |
| 10             | 3           | 13           | 0           | 17          |
| 10             | 3           | 13           | 1           | 17          |
| 10             | 1           | 12           | 2           | 17          |
| 10             | 0           | 12           | 1           | 17          |
| 11             | 6           | 13           | 0           | 17          |
| 11             | 6           | 13           | 0           | 17          |
| 11             | 3           | 12           | 0           | 17          |
| 11             | 4           | 13           | 2           | 17          |
| 11             | 1           | 13           | 1           | 17          |
| 11             | 3           | 13           | 0           | 17          |
| 13             | 4           | 12           | 1           | 17          |
| 13             | 5           | 13           | 0           | 17          |
| 20             | 4           | 13           | 0           | 17          |
| <b>Total</b>   | <b>158</b>  | <b>1246</b>  | <b>17</b>   | <b>1751</b> |
| <b>Average</b> | <b>1.53</b> | <b>12.10</b> | <b>0.17</b> | <b>17</b>   |
